# Supplementary material for: Activation of mTORC1 and c-Jun by Prohibitin1 loss in Schwann cells may link mitochondrial dysfunction to demyelination
Source: eLife. 2021 Sep 14;10:e66278. doi: 10.7554/eLife.66278 (PMC8478418; doi:10.7554/eLife.66278)
Supplement: Figure 1—figure supplement 1—source data 2. [file elife-66278-fig1-figsupp1-data2.xlsx]

## Sheet: Figure 1–figure supplement 1B
Figure 1–figure supplement 1B
p-AKT
	Control								Phb1-SCKO										Significant?	P value	Mean of Control	Mean of Phb1-SCKO	Difference	SE of difference	t ratio	df
P20	0.865367	1.0242	0.843947	1.26649	0.780972	1.21903	0.71507	1.28493	0.775507	1.10861	1.23948	0.775979	0.828132	1.08685	0.785741	1.51377		P20	No	0.91143	1	1.01426	-0.0142582	0.125886	0.113263	14
P40	0.848099	0.813672	1.63153	0.7067	1.25105	0.748953	1.26827	0.731728	0.735943	0.38945	0.807538	0.96914	0.753041	0.817068	1.1195	1.2071		P40	No	0.33462	1	0.849848	0.150152	0.150261	0.999276	14
P90	0.802115	0.882008	1.31588	0.949079	1.05092	1.35163	0.648367		2.21843	1.35696	0.883235	0.917068	1.97493	1.12013	1.13421			P90	No	0.118018	1	1.37214	-0.372138	0.221003	1.68386	12
AKT
	Control								Phb1-SCKO										Significant?	P value	Mean of Control	Mean of Phb1-SCKO	Difference	SE of difference	t ratio	df
P20	0.788962	1.19137	0.995612	1.02405	0.892481	1.10752	1.01277	0.987234	0.479692	0.775524	0.795295	0.644084	0.874579	1.0482	1.00318	0.94054		P20	Yes	0.041013	1	0.820137	0.179863	0.0799205	2.25053	14
P40	0.853669	1.57062	0.864527	0.71118	1.13013	0.869872	1.01664	0.983362	0.617469	0.941845	0.958204	0.735366	0.74079	0.679717	1.25504	0.968461		P40	No	0.26462	1	0.862111	0.137889	0.118654	1.16211	14
P90	0.978574	1.15645	0.864976	0.900703	1.0993	1.03361	0.966389		0.761583	0.822643	1.00928	1.20948	1.14763	1.06443	1.07047			P90	No	0.870872	1	1.01222	-0.012216	0.0735623	0.166063	12
	Control						Phb1-SCKO												Significant?	P value	Mean of Control	Mean of Phb1-SCKO	Difference	SE of difference	t ratio	df
P20	1.02891	0.97109	0.514005	1.48599	0.805459	1.19454	1.13412	1.12213	0.792872	0.532079	1.02287	1.09574						P20	No	0.770953	1	0.949968	0.0500322	0.167249	0.299147	10
P40	0.962639	1.03736	0.976109	1.02389	1.05201	0.947985	1.17201	1.2503	1.92026	0.890552	0.839675	0.784852						P40	No	0.430893	1	1.14294	-0.142942	0.174149	0.820798	10
P90	0.76113	1.23887	1.04039	0.959608	0.592107	1.40789	0.977357	0.774623	0.758246	1.16847	0.723522	0.866844						P90	No	0.406687	1	0.878178	0.121822	0.140641	0.866192	10
	Control						Phb1-SCKO												Significant?	P value	Mean of Control	Mean of Phb1-SCKO	Difference	SE of difference	t ratio	df
P20	0.994489	1.00551	0.520564	1.47944	0.734353	1.26565	1.23143	1.12668	0.805985	0.569611	1.04179	1.03833						P20	No	0.860695	1	0.96897	0.0310297	0.172321	0.180069	10
P40	0.970424	1.02958	0.946175	1.05383	1.14203	0.857974	0.955645	1.11491	1.64484	0.707415	0.626498	0.5925						P40	No	0.73001	1	0.940302	0.0596977	0.168193	0.354935	10
P90	0.646175	1.35383	0.950951	1.04905	0.573699	1.4263	0.889507	0.784139	0.564167	0.884836	0.6696	0.475181						P90	No	0.100678	1	0.711238	0.288762	0.159685	1.80832	10
