# Supplementary material for: Activation of mTORC1 and c-Jun by Prohibitin1 loss in Schwann cells may link mitochondrial dysfunction to demyelination
Source: eLife. 2021 Sep 14;10:e66278. doi: 10.7554/eLife.66278 (PMC8478418; doi:10.7554/eLife.66278)
Supplement: Figure 1—figure supplement 2—source data 2. [file elife-66278-fig1-figsupp2-data2.xlsx]

## Sheet: Figure 1–figure supplement 2B
Figure 1–figure supplement 2B
Control	Phb1-SCKO			Table Analyzed	c-Jun
0.87645	2.82428
1.12355	2.72693			Column B	Phb1-SCKO
1.03362	4.3432			vs.	vs.
0.96638				Column A	Control
				Unpaired t test
				P value	0.0035
				P value summary	**
				Significantly different (P < 0.05)?	Yes
				One- or two-tailed P value?	Two-tailed
				t, df	t=5.198, df=5
				How big is the difference?
				Mean of column A	1
				Mean of column B	3.298
				Difference between means (B - A) ± SEM	2.298 ± 0.4422
				95% confidence interval	1.162 to 3.435
				R squared (eta squared)	0.8438
				F test to compare variances
				F, DFn, Dfd	75.16, 2, 3
				P value	0.0055
				P value summary	**
				Significantly different (P < 0.05)?	Yes
				Data analyzed
				Sample size, column A	4
				Sample size, column B	3

## Sheet: Figure 1–figure supplement 2C
Figure 1–figure supplement 2C
p-4E-BP1			4E-BP1			p-4E-BP1/4E-BP1			p-S6			S6			p-S6/S6
Control	Phb1-SCKO		Control	Phb1-SCKO		Control	Phb1-SCKO		Control	Phb1-SCKO		Control	Phb1-SCKO		Control	Phb1-SCKO
0.722169	3.86397		0.876514	1.54838		0.840172	2.54475		0.872671	2.95877		0.912349	2.3291		0.959875	1.27482
1.27783	5.81562		1.12349	2.37261		1.15983	2.49953		1.12733	3.04566		1.08765	2.35693		1.04012	1.29676
0.942525	3.5223		1.17018	3.24484		0.774553	1.04386		1.13766	4.80975		0.996395	2.21011		1.1412	2.17514
1.05747			0.829823			1.22545			0.862336			1.00361			0.858801
Table Analyzed	p-4E-BP1		Table Analyzed	4E-BP1		Table Analyzed	p-4E-BP1/4E-BP1		Table Analyzed	p-S6		Table Analyzed	S6		Table Analyzed	p-S6/S6
Column B	Phb1-SCKO		Column B	Phb1-SCKO		Column B	Phb1-SCKO		Column B	Phb1-SCKO		Column B	Phb1-SCKO		Column B	Phb1-SCKO
vs.	vs.		vs.	vs.		vs.	vs.		vs.	vs.		vs.	vs.		vs.	vs.
Column A	Control		Column A	Control		Column A	Control		Column A	Control		Column A	Control		Column A	Control
Unpaired t test			Unpaired t test			Unpaired t test			Unpaired t test			Unpaired t test			Unpaired t test
P value	0.0026		P value	0.0217		P value	0.0636		P value	0.0038		P value	<0.0001		P value	0.0737
P value summary	**		P value summary	*		P value summary	ns		P value summary	**		P value summary	****		P value summary	ns
Significantly different (P < 0.05)?	Yes		Significantly different (P < 0.05)?	Yes		Significantly different (P < 0.05)?	No		Significantly different (P < 0.05)?	Yes		Significantly different (P < 0.05)?	Yes		Significantly different (P < 0.05)?	No
One- or two-tailed P value?	Two-tailed		One- or two-tailed P value?	Two-tailed		One- or two-tailed P value?	Two-tailed		One- or two-tailed P value?	Two-tailed		One- or two-tailed P value?	Two-tailed		One- or two-tailed P value?	Two-tailed
t, df	t=5.546, df=5		t, df	t=3.289, df=5		t, df	t=2.375, df=5		t, df	t=5.081, df=5		t, df	t=22.91, df=5		t, df	t=2.257, df=5
How big is the difference?			How big is the difference?			How big is the difference?			How big is the difference?			How big is the difference?			How big is the difference?
Mean of column A	1		Mean of column A	1		Mean of column A	1		Mean of column A	1		Mean of column A	1		Mean of column A	1
Mean of column B	4.401		Mean of column B	2.389		Mean of column B	2.029		Mean of column B	3.605		Mean of column B	2.299		Mean of column B	1.582
Difference between means (B - A) ± SEM	3.401 ± 0.6132		Difference between means (B - A) ± SEM	1.389 ± 0.4222		Difference between means (B - A) ± SEM	1.029 ± 0.4335		Difference between means (B - A) ± SEM	2.605 ± 0.5126		Difference between means (B - A) ± SEM	1.299 ± 0.05670		Difference between means (B - A) ± SEM	0.5822 ± 0.2580
95% confidence interval	1.824 to 4.977		95% confidence interval	0.3033 to 2.474		95% confidence interval	-0.08492 to 2.144		95% confidence interval	1.287 to 3.922		95% confidence interval	1.153 to 1.444		95% confidence interval	-0.08102 to 1.245
R squared (eta squared)	0.8602		R squared (eta squared)	0.6839		R squared (eta squared)	0.53		R squared (eta squared)	0.8378		R squared (eta squared)	0.9906		R squared (eta squared)	0.5046
F test to compare variances			F test to compare variances			F test to compare variances			F test to compare variances			F test to compare variances			F test to compare variances
F, DFn, Dfd	28.53, 2, 3		F, DFn, Dfd	24.42, 2, 3		F, DFn, Dfd	14.32, 2, 3		F, DFn, Dfd	46.54, 2, 3		F, DFn, Dfd	1.185, 2, 3		F, DFn, Dfd	18.36, 2, 3
P value	0.0223		P value	0.0278		P value	0.0584		P value	0.011		P value	0.8349		P value	0.0415
P value summary	*		P value summary	*		P value summary	ns		P value summary	*		P value summary	ns		P value summary	*
Significantly different (P < 0.05)?	Yes		Significantly different (P < 0.05)?	Yes		Significantly different (P < 0.05)?	No		Significantly different (P < 0.05)?	Yes		Significantly different (P < 0.05)?	No		Significantly different (P < 0.05)?	Yes
Data analyzed			Data analyzed			Data analyzed			Data analyzed			Data analyzed			Data analyzed
Sample size, column A	4		Sample size, column A	4		Sample size, column A	4		Sample size, column A	4		Sample size, column A	4		Sample size, column A	4
Sample size, column B	3		Sample size, column B	3		Sample size, column B	3		Sample size, column B	3		Sample size, column B	3		Sample size, column B	3
