# Supplementary material for: Activation of mTORC1 and c-Jun by Prohibitin1 loss in Schwann cells may link mitochondrial dysfunction to demyelination
Source: eLife. 2021 Sep 14;10:e66278. doi: 10.7554/eLife.66278 (PMC8478418; doi:10.7554/eLife.66278)
Supplement: Figure 1—figure supplement 3—source data 1. [file elife-66278-fig1-figsupp3-data1.xlsx]

## Sheet: Figure 1–figure supplement 3A
Figure 1–figure supplement 2C
p-4E-BP1 / 4E-BP1
	Control								Phb1-SCKO
P20	0.399301	1.10757	1.50688	0.986255	0.999936	1.00006	0.902943	1.09706	2.36435	1.55059	0.972895	0.582061	1.17402	1.41429	0.656848	1.09763
P40	1.13466	0.660263	0.416852	1.78822	1.08968	0.910317	1.20782	0.792181	0.899952	2.02627	3.66665	1.74685	1.39718	1.97872	2.16392	3.08827
P90	0.941765	1.05824	1.22772	0.772275					1.19589	1.21136	0.768044	2.53306
	Significant?	P value	Mean of Control	Mean of Phb1-SCKO	Difference	SE of difference	t ratio	df
P20	No	0.33685	1	1.22658	-0.226584	0.227833	0.994518	14
P40	Yes	0.005943	1	2.12098	-1.12098	0.346099	3.23889	14
P90	No	0.320613	1	1.42709	-0.427089	0.394547	1.08248	6
p-S6/S6
	Control								Phb1-SCKO
P20	0.990028	1.00997	0.68298	1.31702	1.39672	0.603283	1.01933	0.98067	1.00803	0.748183	4.44323	2.41303	0.546301	0.361521	1.11293	0.938912
P40	1.08584	0.914162	1.07739	0.922614	1.05218	0.947822	0.92198	1.07802	0.569445	1.17842	1.24786	1.29868	1.23943	0.996469	2.87351	2.19581
P90	0.787603	1.2124	0.859976	1.14002	1.08776	1.13964	0.772599		1.39589	2.56083	0.394418	0.475793	0.982649	1.66787	0.80429
	Significant?	P value	Mean of Control	Mean of Phb1-SCKO	Difference	SE of difference	t ratio	df
P20	No	0.377962	1	1.44652	-0.446518	0.490402	0.910514	14
P40	No	0.105674	1	1.44995	-0.449953	0.260146	1.72962	14
P90	No	0.548429	1	1.18311	-0.183107	0.296518	0.617523	12
