# Supplementary material for: Activation of mTORC1 and c-Jun by Prohibitin1 loss in Schwann cells may link mitochondrial dysfunction to demyelination
Source: eLife. 2021 Sep 14;10:e66278. doi: 10.7554/eLife.66278 (PMC8478418; doi:10.7554/eLife.66278)
Supplement: Figure 1—source data 2. [file elife-66278-fig1-data2.xlsx]

## Sheet: Figure 1B
Figure 1B
Myelinated		Control			Phb1-SCKO
	P20	50000	41496.6	43537.4	43197.3	49659.9	48639.5
	P40	35374.1	34353.7	41836.7	27551	29251.7	32312.9
	P90	32653.1	31292.5	31972.8	22108.8	17346.9	17687.1
Compare each cell mean with the other cell mean in that row
Number of families	1
Number of comparisons per family	3
Alpha	0.05
Uncorrected Fisher's LSD	Mean Diff.	95.00% CI of diff.	Significant?	Summary	Individual P Value
Control - Phb1-SCKO
P20	-2154	-11400 to 7092	No	ns	0.5462
P40	7483	-816.7 to 15783	No	ns	0.0648
P90	12925	6814 to 19036	Yes	*	0.0101
Test details	Mean 1	Mean 2	Mean Diff.	SE of diff.	N1	N2	t	DF
Control - Phb1-SCKO
P20	45011	47166	-2154	3255	3	3	0.6619	3.782
P40	37188	29705	7483	2726	3	3	2.745	3.257
P90	31973	19048	12925	1583	3	3	8.164	2.261
Demyelinated		Control			Phb1-SCKO
	P20	0	0	0	2380.95	340.136	1700.68
	P40	0	0	0	5782.31	4081.63	4421.77
	P90	0	0	0	10204.1	19727.9	19047.6
Compare each cell mean with the other cell mean in that row
Number of families	1
Number of comparisons per family	3
Alpha	0.05
Uncorrected Fisher's LSD	Mean Diff.	95.00% CI of diff.	Significant?	Summary	Individual P Value
Control - Phb1-SCKO
P20	-1474	-4055 to 1107	No	ns	0.1333
P40	-4762	-6997 to -2526	Yes	*	0.0117
P90	-16327	-29525 to -3128	Yes	*	0.0335
Test details	Mean 1	Mean 2	Mean Diff.	SE of diff.	N1	N2	t	DF
Control - Phb1-SCKO
P20	0	1474	-1474	599.9	3	3	2.457	2
P40	0	4762	-4762	519.6	3	3	9.165	2
P90	0	16327	-16327	3068	3	3	5.322	2
Degenerating		Control			Phb1-SCKO
	P20	0	0	0	340.136	0	340.136
	P40	0	0	0	340.136	680.272	340.136
	P90	0	0	0	0	340.136	0
Compare each cell mean with the other cell mean in that row
Number of families	1
Number of comparisons per family	3
Alpha	0.05
Uncorrected Fisher's LSD	Mean Diff.	95.00% CI of diff.	Significant?	Summary	Individual P Value
Control - Phb1-SCKO
P20	-226.8	-714.6 to 261.1	No	ns	0.1835
P40	-453.5	-941.3 to 34.31	No	ns	0.0572
P90	-113.4	-601.2 to 374.5	No	ns	0.4226
Test details	Mean 1	Mean 2	Mean Diff.	SE of diff.	N1	N2	t	DF
Control - Phb1-SCKO
P20	0	226.8	-226.8	113.4	3	3	2	2
P40	0	453.5	-453.5	113.4	3	3	4	2
P90	0	113.4	-113.4	113.4	3	3	1	2

## Sheet: Figure 1D
Figure 1D
p-4E-BP1
	Control									Phb1-SCKO											Significant?	P value	Mean of Control	Mean of Phb1-SCKO	Difference	SE of difference	t ratio	df
P20	0.30901	0.924787	0.978225	1.78798	0.781469	1.21853	0.961803	1.0382		1.93378	1.31027	0.832134	0.769602	1.10007	3.42387	3.07608	3.26743			P20	Yes	0.03995	1	1.96416	-0.964155	0.425781	2.26444	14
P40	1.9556	0.847891	0.604209	0.592301	1.27873	0.72127	1.0244	0.975597		1.33453	3.75644	5.10933	3.91924	4.07794	7.62477	4.41226	5.48174			P40	Yes	0.000105	1	4.46453	-3.46453	0.649191	5.33668	14
P90	1.24642	0.753585	1.08208	0.917921						2.29197	5.16615	3.16545	4.54795							P90	Yes	0.005515	1	3.79288	-2.79288	0.660638	4.22755	6
4E-BP1
	Control									Phb1-SCKO											Significant?	P value	Mean of Control	Mean of Phb1-SCKO	Difference	SE of difference	t ratio	df
P20	0.760395	0.820425	0.637865	1.78131	0.875894	1.12411	0.961868	1.03813		0.803643	0.830291	0.840417	1.29917	1.69494	3.15692	2.62014	2.31031			P20	No	0.063768	1	1.69448	-0.694479	0.345013	2.01291	14
P40	1.43975	1.07274	1.21082	0.27669	1.07527	0.924729	0.934576	1.06542		1.23875	1.54865	1.16404	1.87422	1.91399	2.50756	3.13943	2.7541			P40	Yes	0.00276	1	2.01759	-1.01759	0.280738	3.6247	14
P90	1.0198	0.980199	1.13965	0.860354						2.99762	2.04868	2.62542	3.72389							P90	Yes	0.002017	1	2.8489	-1.8489	0.355645	5.19873	6
c-Jun
	Control									Phb1-SCKO											Significant?	P value	Mean of Control	Mean of Phb1-SCKO	Difference	SE of difference	t ratio	df
P20	0.701885	1.1026	1.04387	1.15165	0.782128	1.21787				1.78809	1.73081	2.6373	1.16891	2.81942	3.50357					P20	Yes	0.005451	1	2.27468	-1.27468	0.361152	3.52949	10
P40	1.67646	0.954714	0.936642	0.432185	1.04694	0.953063				7.21798	6.17186	3.41637	3.34397	2.57314	3.49884					P40	Yes	0.001468	1	4.37036	-3.37036	0.776701	4.33932	10
P90	1.02654	0.973458	1.08652	1.0529	0.860584					1.88389	2.34317	2.90609	2.73403	2.10404						P90	Yes	9.5e-05	1	2.39425	-1.39425	0.194405	7.17187	8
p-S6
	Control									Phb1-SCKO											Significant?	P value	Mean of Control	Mean of Phb1-SCKO	Difference	SE of difference	t ratio	df
P20	0.627692	1.37231	0.450947	1.54905	1.07747	0.922527	1.13874	0.861255		0.831344	2.0984	5.00485	3.33851	1.07834	0.873708	2.29054	1.62791			P20	Yes	0.04627	1	2.14295	-1.14295	0.522771	2.18633	14
P40	1.20317	0.79683	0.971952	1.02805	0.738847	1.26115	1.15523	0.844768		1.11492	2.54524	2.57446	2.12955	7.65897	5.67796	2.70842	2.55293			P40	Yes	0.00805	1	3.37031	-2.37031	0.768035	3.08619	14
P90	1.12754	0.87246	1.08822	1.03218	0.879596	0.887424	1.11258			1.77635	3.9746	0.783503	0.638517	1.82604	0.427763	0.680823				P90	No	0.367571	1	1.44394	-0.443941	0.474135	0.936318	12
S6
	Control									Phb1-SCKO											Significant?	P value	Mean of Control	Mean of Phb1-SCKO	Difference	SE of difference	t ratio	df
P20	0.636315	1.36369	0.719067	1.28093	1.05823	0.941769	0.727002	1.273		0.82771	2.81483	1.22672	1.50675	0.970015	0.931601	3.73873	4.01526			P20	No	0.053883	1	2.00395	-1.00395	0.477051	2.1045	14
P40	1.11942	0.880585	0.894794	1.10521	0.813058	1.18694	1.1039	0.896105		1.97797	2.18201	2.0463	1.62643	2.70424	2.62353	2.19706	2.57587			P40	Yes	<0.000001	1	2.24168	-1.24168	0.140497	8.83777	14
P90	1.17394	0.826057	1.33097	0.669029	0.985764	0.892432	1.1218	1.02789	0.972113	1.08863	1.15055	1.1831	1.44297	0.785652	0.377222	2.2371	1.08031	1.42534		P90	No	0.294325	1	1.19676	-0.196762	0.181474	1.08424	16
