# Supplementary material for: Activation of mTORC1 and c-Jun by Prohibitin1 loss in Schwann cells may link mitochondrial dysfunction to demyelination
Source: eLife. 2021 Sep 14;10:e66278. doi: 10.7554/eLife.66278 (PMC8478418; doi:10.7554/eLife.66278)
Supplement: Figure 2—figure supplement 1—source data 2. [file elife-66278-fig2-figsupp1-data2.xlsx]

## Sheet: Figure 2–figure supplement 1B
Figure 2–figure supplement 1B
p-eIF2a					Number of families	1
Veh	FCCP	Oligo	AA		Number of comparisons per family	3
0.885507	1.21723	1.25485	1.06842		Alpha	0.05
1.19667	1.11256	1.16105	1.03378
0.917825	0.978202	1.04085	0.933426		Dunnett's multiple comparisons test	Mean Diff.	95.00% CI of diff.	Significant?	Summary	Adjusted P Value	A-?
0.73346	1.95436	1.76376	1.39735		Veh vs. FCCP	-0.4475	-0.8878 to -0.007189	Yes	*	0.0459	B	FCCP
0.830586	1.93315	1.4133	1.27563		Veh vs. Oligo	-0.3375	-0.7778 to 0.1028	No	ns	0.1573	C	Oligo
1.43595	1.48944	1.3914	0.772157		Veh vs. AA	-0.08013	-0.5204 to 0.3602	No	ns	0.9382	D	AA
					Test details	Mean 1	Mean 2	Mean Diff.	SE of diff.	n1	n2	q	DF
					Veh vs. FCCP	1	1.447	-0.4475	0.1733	6	6	2.582	20
					Veh vs. Oligo	1	1.338	-0.3375	0.1733	6	6	1.948	20
					Veh vs. AA	1	1.08	-0.08013	0.1733	6	6	0.4623	20
eIF2a					Number of families	1
Veh	FCCP	Oligo	AA		Number of comparisons per family	3
1.07763	0.976806	1.24679	1.10875		Alpha	0.05
1.03192	1.24198	1.24012	0.699942
0.890456	1.21445	1.15165	0.716166		Dunnett's multiple comparisons test	Mean Diff.	95.00% CI of diff.	Significant?	Summary	Adjusted P Value	A-?
1.07659	1.06175	1.20321	1.15462		Veh vs. FCCP	-0.2306	-0.5867 to 0.1256	No	ns	0.2636	B	FCCP
0.953573	1.03657	1.80137	1.02815		Veh vs. Oligo	-0.2944	-0.6505 to 0.06179	No	ns	0.119	C	Oligo
0.96984	1.85191	1.12308	1.32715		Veh vs. AA	-0.005797	-0.3620 to 0.3504	No	ns	>0.9999	D	AA
					Test details	Mean 1	Mean 2	Mean Diff.	SE of diff.	n1	n2	q	DF
					Veh vs. FCCP	1	1.231	-0.2306	0.1402	6	6	1.645	20
					Veh vs. Oligo	1	1.294	-0.2944	0.1402	6	6	2.1	20
					Veh vs. AA	1	1.006	-0.005797	0.1402	6	6	0.04135	20
p-eIF2a/eIF2a					Number of families	1
Veh	FCCP	Oligo	AA		Number of comparisons per family	3
0.818418	1.24112	1.00242	0.959748		Alpha	0.05
1.15499	0.892193	0.932479	1.47101
1.02659	0.802232	0.900154	1.29813		Dunnett's multiple comparisons test	Mean Diff.	95.00% CI of diff.	Significant?	Summary	Adjusted P Value	A-?
0.673889	1.82071	1.44996	1.1971		Veh vs. FCCP	-0.2328	-0.7420 to 0.2765	No	ns	0.5261	B	FCCP
0.861571	1.84471	0.776051	1.22723		Veh vs. Oligo	-0.04776	-0.5570 to 0.4615	No	ns	0.9904	C	Oligo
1.46454	0.795546	1.22546	0.575502		Veh vs. AA	-0.1215	-0.6307 to 0.3878	No	ns	0.8763	D	AA
					Test details	Mean 1	Mean 2	Mean Diff.	SE of diff.	n1	n2	q	DF
					Veh vs. FCCP	1	1.233	-0.2328	0.2004	6	6	1.161	20
					Veh vs. Oligo	1	1.048	-0.04776	0.2004	6	6	0.2383	20
					Veh vs. AA	1	1.121	-0.1215	0.2004	6	6	0.6059	20
p-S6					Number of families	1
Veh	FCCP	Oligo	AA		Number of comparisons per family	3
1.11392	0.907578	0.919764	0.652064		Alpha	0.05
0.938865	0.920681	1.09491	0.613375
0.947213	0.949848	0.845224	0.605304		Dunnett's multiple comparisons test	Mean Diff.	95.00% CI of diff.	Significant?	Summary	Adjusted P Value	A-?
1.03134	1.00034	1.44846	0.679214		Veh vs. FCCP	0.0356	-0.2471 to 0.3183	No	ns	0.9777	B	FCCP
1.04601	1.22026	1.67308	0.850544		Veh vs. Oligo	-0.1957	-0.4784 to 0.08707	No	ns	0.2187	C	Oligo
0.922659	0.787694	1.19261	0.970842		Veh vs. AA	0.2714	-0.01130 to 0.5542	No	ns	0.0615	D	AA
					Test details	Mean 1	Mean 2	Mean Diff.	SE of diff.	n1	n2	q	DF
					Veh vs. FCCP	1	0.9644	0.0356	0.1113	6	6	0.3199	20
					Veh vs. Oligo	1	1.196	-0.1957	0.1113	6	6	1.758	20
					Veh vs. AA	1	0.7286	0.2714	0.1113	6	6	2.439	20
S6					Number of families	1
Veh	FCCP	Oligo	AA		Number of comparisons per family	3
0.988603	1.07433	0.764442	0.739696		Alpha	0.05
1.26952	0.671448	0.691914	0.930057
0.741881	0.757185	0.78979	0.733038		Dunnett's multiple comparisons test	Mean Diff.	95.00% CI of diff.	Significant?	Summary	Adjusted P Value	A-?
0.881506	1.21427	1.19823	0.95905		Veh vs. FCCP	0.04004	-0.2647 to 0.3448	No	ns	0.9749	B	FCCP
1.0505	1.10418	1.36423	0.895947		Veh vs. Oligo	-0.01016	-0.3149 to 0.2946	No	ns	0.9995	C	Oligo
1.06799	0.938335	1.25238	0.785285		Veh vs. AA	0.1595	-0.1453 to 0.4643	No	ns	0.4226	D	AA
					Test details	Mean 1	Mean 2	Mean Diff.	SE of diff.	n1	n2	q	DF
					Veh vs. FCCP	1	0.96	0.04004	0.12	6	6	0.3338	20
					Veh vs. Oligo	1	1.01	-0.01016	0.12	6	6	0.08472	20
					Veh vs. AA	1	0.8405	0.1595	0.12	6	6	1.329	20
					Number of families	1
p-S6/S6					Number of comparisons per family	3
Veh	FCCP	Oligo	AA		Alpha	0.05
1.07547	0.806331	1.14841	0.841401
0.705879	1.30877	1.51039	0.62948		Dunnett's multiple comparisons test	Mean Diff.	95.00% CI of diff.	Significant?	Summary	Adjusted P Value	A-?
1.21865	1.19734	1.02147	0.788157		Veh vs. FCCP	-0.008966	-0.3103 to 0.2924	No	ns	0.9996	B	FCCP
1.15854	0.815772	1.19702	0.701293		Veh vs. Oligo	-0.1724	-0.4738 to 0.1289	No	ns	0.3539	C	Oligo
0.985987	1.09433	1.21441	0.940046		Veh vs. AA	0.1459	-0.1554 to 0.4472	No	ns	0.4824	D	AA
0.855477	0.831255	0.942971	1.22421
					Test details	Mean 1	Mean 2	Mean Diff.	SE of diff.	n1	n2	q	DF
					Veh vs. FCCP	1	1.009	-0.008966	0.1186	6	6	0.07559	20
					Veh vs. Oligo	1	1.172	-0.1724	0.1186	6	6	1.454	20
					Veh vs. AA	1	0.8541	0.1459	0.1186	6	6	1.23	20
p-4E-BP1					Number of families	1
Veh	FCCP	Oligo	AA		Number of comparisons per family	3
0.927101	1.26381	1.10443	0.933468		Alpha	0.05
1.12355	1.2802	0.943328	0.849352
0.949353	1.02101	0.934107	0.844828		Dunnett's multiple comparisons test	Mean Diff.	95.00% CI of diff.	Significant?	Summary	Adjusted P Value	A-?
1.0869	0.995786	1.45484	0.893813		Veh vs. FCCP	-0.09138	-0.3132 to 0.1304	No	ns	0.6014	B	FCCP
1.13051	1.11482	1.03536	1.083		Veh vs. Oligo	-0.1148	-0.3366 to 0.1070	No	ns	0.4309	C	Oligo
0.782597	0.872626	1.21685	0.873232		Veh vs. AA	0.08705	-0.1348 to 0.3089	No	ns	0.6346	D	AA
					Test details	Mean 1	Mean 2	Mean Diff.	SE of diff.	n1	n2	q	DF
					Veh vs. FCCP	1	1.091	-0.09138	0.08731	6	6	1.047	20
					Veh vs. Oligo	1	1.115	-0.1148	0.08731	6	6	1.315	20
					Veh vs. AA	1	0.9129	0.08705	0.08731	6	6	0.9971	20
4E-BP1					Number of families	1
Veh	FCCP	Oligo	AA		Number of comparisons per family	3
1.115	0.923854	0.989533	1.11038		Alpha	0.05
1.21659	0.93369	0.891295	0.884016
0.668414	0.803921	0.881794	0.869264		Dunnett's multiple comparisons test	Mean Diff.	95.00% CI of diff.	Significant?	Summary	Adjusted P Value	A-?
1.02806	1.84477	1.45649	1.2784		Veh vs. FCCP	-0.2704	-0.7477 to 0.2069	No	ns	0.3616	B	FCCP
0.74543	1.76505	1.70336	1.16762		Veh vs. Oligo	-0.2403	-0.7177 to 0.2370	No	ns	0.4524	C	Oligo
1.22651	1.35109	1.51951	0.91763		Veh vs. AA	-0.03789	-0.5152 to 0.4394	No	ns	0.9941	D	AA
					Test details	Mean 1	Mean 2	Mean Diff.	SE of diff.	n1	n2	q	DF
					Veh vs. FCCP	1	1.27	-0.2704	0.1879	6	6	1.439	20
					Veh vs. Oligo	1	1.24	-0.2403	0.1879	6	6	1.279	20
					Veh vs. AA	1	1.038	-0.03789	0.1879	6	6	0.2016	20
p-4E-BP1/4E-BP1					Number of families	1
Veh	FCCP	Oligo	AA		Number of comparisons per family	3
0.785577	1.29245	1.05449	0.794259		Alpha	0.05
0.872533	1.29542	0.999945	0.907742
1.34189	1.19992	1.00084	0.91823		Dunnett's multiple comparisons test	Mean Diff.	95.00% CI of diff.	Significant?	Summary	Adjusted P Value	A-?
0.987489	0.504181	0.932978	0.653043		Veh vs. FCCP	0.0858	-0.3137 to 0.4853	No	ns	0.9049	B	FCCP
1.41654	0.589942	0.567736	0.866345		Veh vs. Oligo	0.116	-0.2835 to 0.5155	No	ns	0.8032	C	Oligo
0.595976	0.603263	0.747991	0.88884		Veh vs. AA	0.1619	-0.2376 to 0.5615	No	ns	0.6128	D	AA
					Test details	Mean 1	Mean 2	Mean Diff.	SE of diff.	n1	n2	q	DF
					Veh vs. FCCP	1	0.9142	0.0858	0.1573	6	6	0.5456	20
					Veh vs. Oligo	1	0.884	0.116	0.1573	6	6	0.7376	20
					Veh vs. AA	1	0.8381	0.1619	0.1573	6	6	1.03	20
c-Jun					Number of families	1
Veh	FCCP	Oligo	AA		Number of comparisons per family	3
1.04666	1.48104	1.45877	1.37252		Alpha	0.05
1.0252	1.19625	1.14187	1.21434
0.928139	1.18308	0.945004	1.0403		Dunnett's multiple comparisons test	Mean Diff.	95.00% CI of diff.	Significant?	Summary	Adjusted P Value	A-?
0.927559	1.42677	1.28547	1.10141		Veh vs. FCCP	-0.2962	-0.6205 to 0.02814	No	ns	0.0779	B	FCCP
0.834407	1.4345	1.44853	0.860646		Veh vs. Oligo	-0.2354	-0.5597 to 0.08889	No	ns	0.1888	C	Oligo
1.23803	1.0553	1.13282	0.441554		Veh vs. AA	-0.005128	-0.3294 to 0.3192	No	ns	>0.9999	D	AA
					Test details	Mean 1	Mean 2	Mean Diff.	SE of diff.	n1	n2	q	DF
					Veh vs. FCCP	1	1.296	-0.2962	0.1276	6	6	2.32	20
					Veh vs. Oligo	1	1.235	-0.2354	0.1276	6	6	1.844	20
					Veh vs. AA	1	1.005	-0.005128	0.1276	6	6	0.04017	20
Bip					Number of families	1
Veh	FCCP	Oligo	AA		Number of comparisons per family	3
0.904816	1.15542	0.750097	0.858335		Alpha	0.05
1.02201	1.13839	0.747273	0.732049
1.07317	0.830092	0.66525	0.72213		Dunnett's multiple comparisons test	Mean Diff.	95.00% CI of diff.	Significant?	Summary	Adjusted P Value	A-?
0.90723	1.37276	1.17765	1.11613		Veh vs. FCCP	-0.17	-0.4444 to 0.1045	No	ns	0.2951	B	FCCP
0.924134	1.27928	1.2584	0.989252		Veh vs. Oligo	0.04036	-0.2341 to 0.3148	No	ns	0.9655	C	Oligo
1.16864	1.24403	1.15917	0.878078		Veh vs. AA	0.1173	-0.1571 to 0.3918	No	ns	0.5751	D	AA
					Test details	Mean 1	Mean 2	Mean Diff.	SE of diff.	n1	n2	q	DF
					Veh vs. FCCP	1	1.17	-0.17	0.108	6	6	1.574	20
					Veh vs. Oligo	1	0.9596	0.04036	0.108	6	6	0.3736	20
					Veh vs. AA	1	0.8827	0.1173	0.108	6	6	1.086	20
Opa1-L/Opa1-s					Number of families	1
Veh	FCCP	Oligo	AA		Number of comparisons per family	3
1.02901	0.474113	0.953856	1.09776		Alpha	0.05
0.916371	0.735849	1.20002	1.37193
1.05462	0.520706	1.1527	1.19336		Dunnett's multiple comparisons test	Mean Diff.	95.00% CI of diff.	Significant?	Summary	Adjusted P Value	A-?
0.950649	0.416454	1.11383	1.13698		Veh vs. FCCP	0.5005	0.2387 to 0.7623	Yes	***	0.0003	B	FCCP
1.01979	0.378726	1.13503	0.979452		Veh vs. Oligo	-0.1058	-0.3676 to 0.1560	No	ns	0.6147	C	Oligo
1.02956	0.471363	1.07944	0.441987		Veh vs. AA	-0.03691	-0.2987 to 0.2249	No	ns	0.9693	D	AA
					Test details	Mean 1	Mean 2	Mean Diff.	SE of diff.	n1	n2	q	DF
					Veh vs. FCCP	1	0.4995	0.5005	0.1031	6	6	4.856	20
					Veh vs. Oligo	1	1.106	-0.1058	0.1031	6	6	1.027	20
					Veh vs. AA	1	1.037	-0.03691	0.1031	6	6	0.3582	20
