# Supplementary material for: Activation of mTORC1 and c-Jun by Prohibitin1 loss in Schwann cells may link mitochondrial dysfunction to demyelination
Source: eLife. 2021 Sep 14;10:e66278. doi: 10.7554/eLife.66278 (PMC8478418; doi:10.7554/eLife.66278)
Supplement: Figure 2—figure supplement 2—source data 1. [file elife-66278-fig2-figsupp2-data1.xlsx]

## Sheet: Figure 2–figure supplement 2A
Figure 2–figure supplement 2A
p-eIF2a/eIF2a					Number of families	1
Veh	FCCP	Oligo	AA		Number of comparisons per family	3
1.01486	2.90587	2.67725	2.68893		Alpha	0.05
0.977211	2.60355	2.43393	2.72108
1.00793	2.49487	2.88995	2.66542		Dunnett's multiple comparisons test	Mean Diff.	95.00% CI of diff.	Significant?	Summary	Adjusted P Value	A-?
0.967415	1.46712	2.05259	1.43131		Veh vs. FCCP	-1.308	-2.084 to -0.5319	Yes	**	0.001	B	FCCP
1.05345	1.35471	2.09131	1.31482		Veh vs. Oligo	-1.378	-2.154 to -0.6015	Yes	***	0.0006	C	Oligo
0.979131	3.02274	2.1214	1.57832		Veh vs. AA	-1.067	-1.843 to -0.2904	Yes	**	0.0063	D	AA
					Test details	Mean 1	Mean 2	Mean Diff.	SE of diff.	n1	n2	q	DF
					Veh vs. FCCP	1	2.308	-1.308	0.3056	6	6	4.281	20
					Veh vs. Oligo	1	2.378	-1.378	0.3056	6	6	4.509	20
					Veh vs. AA	1	2.067	-1.067	0.3056	6	6	3.491	20
p-S6/S6					Number of families	1
Veh	FCCP	Oligo	AA		Number of comparisons per family	3
1.29949	0.753131	1.28409	0.663654		Alpha	0.05
0.906723	0.826975	1.23019	0.690249
0.793784	0.654455	1.19387	0.859392		Dunnett's multiple comparisons test	Mean Diff.	95.00% CI of diff.	Significant?	Summary	Adjusted P Value	A-?
0.99507	0.759426	1.27507	0.776653		Veh vs. FCCP	0.2234	-0.02670 to 0.4735	No	ns	0.0861	B	FCCP
1.04176	0.925104	1.49526	0.831254		Veh vs. Oligo	-0.3795	-0.6296 to -0.1294	Yes	**	0.0027	C	Oligo
0.963168	0.740539	1.79863	0.4168		Veh vs. AA	0.2937	0.04357 to 0.5438	Yes	*	0.0195	D	AA
					Test details	Mean 1	Mean 2	Mean Diff.	SE of diff.	n1	n2	q	DF
					Veh vs. FCCP	1	0.7766	0.2234	0.09844	6	6	2.269	20
					Veh vs. Oligo	1	1.38	-0.3795	0.09844	6	6	3.855	20
					Veh vs. AA	1	0.7063	0.2937	0.09844	6	6	2.983	20
p-4E-BP1/4E-BP1					Number of families	1
Veh	FCCP	Oligo	AA		Number of comparisons per family	3
0.740835	0.742054	1.97967	1.86497		Alpha	0.05
0.936884	1.3769	1.49616	1.33932
1.32228	1.1442	1.60824	2.78834		Dunnett's multiple comparisons test	Mean Diff.	95.00% CI of diff.	Significant?	Summary	Adjusted P Value	A-?
1.01902	1.13646	1.55577	1.21201		Veh vs. FCCP	-0.1094	-0.6803 to 0.4615	No	ns	0.9291	B	FCCP
1.00207	1.30505	1.40571	0.913234		Veh vs. Oligo	-0.5248	-1.096 to 0.04606	No	ns	0.0756	C	Oligo
0.978912	0.951827	1.10333	1.7005		Veh vs. AA	-0.6364	-1.207 to -0.06552	Yes	*	0.0271	D	AA
					Test details	Mean 1	Mean 2	Mean Diff.	SE of diff.	n1	n2	q	DF
					Veh vs. FCCP	1	1.109	-0.1094	0.2247	6	6	0.4869	20
					Veh vs. Oligo	1	1.525	-0.5248	0.2247	6	6	2.336	20
					Veh vs. AA	1	1.636	-0.6364	0.2247	6	6	2.832	20
