# Supplementary material for: Activation of mTORC1 and c-Jun by Prohibitin1 loss in Schwann cells may link mitochondrial dysfunction to demyelination
Source: eLife. 2021 Sep 14;10:e66278. doi: 10.7554/eLife.66278 (PMC8478418; doi:10.7554/eLife.66278)
Supplement: Figure 2—source data 2. [file elife-66278-fig2-data2.xlsx]

## Sheet: Figure 2B
Figure 2B
p-eIF2a					Number of families	1
Veh	FCCP	Oligo	AA		Number of comparisons per family	3
1.05291	1.18382	4.38769	3.41362		Alpha	0.05
0.967414	1.41544	4.12133	2.64184
0.979673	1.93647	3.96165	2.5176		Dunnett's multiple comparisons test	Mean Diff.	95.00% CI of diff.	Significant?	Summary	Adjusted P Value	A-?
1.07634	1.46718	3.11423	1.81213		Veh vs. FCCP	-0.4625	-1.125 to 0.1996	No	ns	0.2127	B	FCCP
0.997554	1.2702	2.92467	1.91751		Veh vs. Oligo	-2.615	-3.277 to -1.952	Yes	****	<0.0001	C	Oligo
0.926108	1.50194	3.17778	2.01586		Veh vs. AA	-1.386	-2.049 to -0.7243	Yes	****	<0.0001	D	AA
					Test details	Mean 1	Mean 2	Mean Diff.	SE of diff.	n1	n2	q	DF
					Veh vs. FCCP	1	1.463	-0.4625	0.2606	6	6	1.775	20
					Veh vs. Oligo	1	3.615	-2.615	0.2606	6	6	10.03	20
					Veh vs. AA	1	2.386	-1.386	0.2606	6	6	5.32	20
eIF2a					Number of families	1
Veh	FCCP	Oligo	AA		Number of comparisons per family	3
1.03769	0.407465	1.63919	1.26975		Alpha	0.05
0.990161	0.54376	1.6936	0.971064
0.97215	0.776327	1.37109	0.944717		Dunnett's multiple comparisons test	Mean Diff.	95.00% CI of diff.	Significant?	Summary	Adjusted P Value	A-?
1.1106	0.998254	1.5145	1.2638		Veh vs. FCCP	0.307	0.05248 to 0.5616	Yes	*	0.0164	B	FCCP
0.945242	0.935937	1.39599	1.45577		Veh vs. Oligo	-0.5183	-0.7728 to -0.2637	Yes	***	0.0001	C	Oligo
0.944156	0.495992	1.49528	1.27494		Veh vs. AA	-0.1967	-0.4512 to 0.05789	No	ns	0.153	D	AA
					Test details	Mean 1	Mean 2	Mean Diff.	SE of diff.	n1	n2	q	DF
					Veh vs. FCCP	1	0.693	0.307	0.1002	6	6	3.064	20
					Veh vs. Oligo	1	1.518	-0.5183	0.1002	6	6	5.172	20
					Veh vs. AA	1	1.197	-0.1967	0.1002	6	6	1.963	20
p-S6					Number of families	1
Veh	FCCP	Oligo	AA		Number of comparisons per family	3
0.98588	0.812445	3.02199	1.26286		Alpha	0.05
1.0532	1.35494	3.35187	1.26897
0.960917	1.09789	3.09081	1.24235		Dunnett's multiple comparisons test	Mean Diff.	95.00% CI of diff.	Significant?	Summary	Adjusted P Value	A-?
0.974123	1.13306	2.39228	0.971062		Veh vs. FCCP	-0.1109	-0.4671 to 0.2453	No	ns	0.7703	B	FCCP
1.08053	1.29191	2.61169	1.14036		Veh vs. Oligo	-1.914	-2.270 to -1.558	Yes	****	<0.0001	C	Oligo
0.94535	0.975184	3.01698	0.585745		Veh vs. AA	-0.07856	-0.4347 to 0.2776	No	ns	0.8982	D	AA
					Test details	Mean 1	Mean 2	Mean Diff.	SE of diff.	n1	n2	q	DF
					Veh vs. FCCP	1	1.111	-0.1109	0.1402	6	6	0.7911	20
					Veh vs. Oligo	1	2.914	-1.914	0.1402	6	6	13.65	20
					Veh vs. AA	1	1.079	-0.07856	0.1402	6	6	0.5603	20
S6					Number of families	1
Veh	FCCP	Oligo	AA		Number of comparisons per family	3
0.858466	1.23304	1.71195	1.53986		Alpha	0.05
1.0639	1.27858	2.00287	1.24391
1.07764	1.94862	1.89651	0.871064		Dunnett's multiple comparisons test	Mean Diff.	95.00% CI of diff.	Significant?	Summary	Adjusted P Value	A-?
0.99413	1.28995	1.45829	1.02608		Veh vs. FCCP	-0.4094	-0.7289 to -0.08996	Yes	*	0.0107	B	FCCP
1.03032	1.26633	1.43075	1.12718		Veh vs. Oligo	-0.673	-0.9925 to -0.3535	Yes	****	<0.0001	C	Oligo
0.975553	1.44001	1.53757	1.08303		Veh vs. AA	-0.1485	-0.4680 to 0.1709	No	ns	0.5133	D	AA
					Test details	Mean 1	Mean 2	Mean Diff.	SE of diff.	n1	n2	q	DF
					Veh vs. FCCP	1	1.409	-0.4094	0.1257	6	6	3.256	20
					Veh vs. Oligo	1	1.673	-0.673	0.1257	6	6	5.352	20
					Veh vs. AA	1	1.149	-0.1485	0.1257	6	6	1.181	20
p-4E-BP1					Number of families	1
Veh	FCCP	Oligo	AA		Number of comparisons per family	3
1.04247	0.708208	3.72382	2.90981		Alpha	0.05
0.84673	1.22517	3.89588	1.69759
1.1108	1.34854	3.38649	2.43474		Dunnett's multiple comparisons test	Mean Diff.	95.00% CI of diff.	Significant?	Summary	Adjusted P Value	A-?
1.26788	1.13811	2.72513	1.64867		Veh vs. FCCP	-0.1727	-0.7796 to 0.4341	No	ns	0.8118	B	FCCP
0.807406	1.42459	3.30488	1.45039		Veh vs. Oligo	-2.268	-2.875 to -1.661	Yes	****	<0.0001	C	Oligo
0.924713	1.19186	2.57068	1.8415		Veh vs. AA	-0.9971	-1.604 to -0.3902	Yes	**	0.0013	D	AA
					Test details	Mean 1	Mean 2	Mean Diff.	SE of diff.	n1	n2	q	DF
					Veh vs. FCCP	1	1.173	-0.1727	0.2389	6	6	0.7232	20
					Veh vs. Oligo	1	3.268	-2.268	0.2389	6	6	9.494	20
					Veh vs. AA	1	1.997	-0.9971	0.2389	6	6	4.174	20
4E-BP1					Number of families	1
Veh	FCCP	Oligo	AA		Number of comparisons per family	3
1.17541	0.789206	2.44411	1.8224		Alpha	0.05
0.932646	1.07773	3.34815	1.77062
0.891947	0.959029	2.71694	1.36971		Dunnett's multiple comparisons test	Mean Diff.	95.00% CI of diff.	Significant?	Summary	Adjusted P Value	A-?
1.23066	1.16344	2.26359	1.66489		Veh vs. FCCP	-0.05812	-0.4258 to 0.3096	No	ns	0.9578	B	FCCP
0.81473	1.20915	2.88287	1.9415		Veh vs. Oligo	-1.701	-2.069 to -1.334	Yes	****	<0.0001	C	Oligo
0.954612	1.15017	2.55305	1.41143		Veh vs. AA	-0.6634	-1.031 to -0.2957	Yes	***	0.0005	D	AA
					Test details	Mean 1	Mean 2	Mean Diff.	SE of diff.	n1	n2	q	DF
					Veh vs. FCCP	1	1.058	-0.05812	0.1447	6	6	0.4016	20
					Veh vs. Oligo	1	2.701	-1.701	0.1447	6	6	11.76	20
					Veh vs. AA	1	1.663	-0.6634	0.1447	6	6	4.584	20
c-Jun					Number of families	1
Veh	FCCP	Oligo	AA		Number of comparisons per family	3
1.02414	0.671631	0.926298	0.750194		Alpha	0.05
1.011	0.746354	1.07677	0.795764
0.964867	0.753973	0.999439	0.548261		Dunnett's multiple comparisons test	Mean Diff.	95.00% CI of diff.	Significant?	Summary	Adjusted P Value	A-?
1.07098	0.880795	0.867714	0.790546		Veh vs. FCCP	0.2086	0.07332 to 0.3438	Yes	**	0.0024	B	FCCP
0.843009	0.881307	1.10685	0.833533		Veh vs. Oligo	0.0001665	-0.1351 to 0.1354	No	ns	>0.9999	C	Oligo
1.08602	0.814553	1.02193	0.668587		Veh vs. AA	0.2689	0.1336 to 0.4041	Yes	***	0.0002	D	AA
					Test details	Mean 1	Mean 2	Mean Diff.	SE of diff.	n1	n2	q	DF
					Veh vs. FCCP	1	0.7914	0.2086	0.05324	6	6	3.918	20
					Veh vs. Oligo	1	0.9998	0.0001665	0.05324	6	6	0.003128	20
					Veh vs. AA	1	0.7311	0.2689	0.05324	6	6	5.05	20
Bip					Number of families	1
Veh	FCCP	Oligo	AA		Number of comparisons per family	3
1.10577	1.19567	1.14922	1.23528		Alpha	0.05
0.964221	1.09631	1.11168	1.16774
0.930009	1.2093	1.24656	1.17164		Dunnett's multiple comparisons test	Mean Diff.	95.00% CI of diff.	Significant?	Summary	Adjusted P Value	A-?
1.1015	0.983263	1.04896	1.00734		Veh vs. FCCP	-0.08992	-0.2410 to 0.06120	No	ns	0.3246	B	FCCP
1.0401	0.977902	0.971463	1.02877		Veh vs. Oligo	-0.09248	-0.2436 to 0.05864	No	ns	0.3039	C	Oligo
0.858395	1.07708	1.02701	1.29887		Veh vs. AA	-0.1516	-0.3027 to -0.0004856	Yes	*	0.0492	D	AA
					Test details	Mean 1	Mean 2	Mean Diff.	SE of diff.	n1	n2	q	DF
					Veh vs. FCCP	1	1.09	-0.08992	0.05948	6	6	1.512	20
					Veh vs. Oligo	1	1.092	-0.09248	0.05948	6	6	1.555	20
					Veh vs. AA	1	1.152	-0.1516	0.05948	6	6	2.549	20
Opa1-L/Opa1-s					Number of families	1
Veh	FCCP	Oligo	AA		Number of comparisons per family	3
0.878101	0.789661	0.745354	1.09715		Alpha	0.05
1.02496	0.89379	0.839373	1.25874
1.09694	0.84919	0.773941	1.04441		Dunnett's multiple comparisons test	Mean Diff.	95.00% CI of diff.	Significant?	Summary	Adjusted P Value	A-?
1.01485	0.89923	0.734858	1.15602		Veh vs. FCCP	0.1113	-0.01779 to 0.2404	No	ns	0.1002	B	FCCP
0.931662	0.964679	0.977473	1.26534		Veh vs. Oligo	0.1584	0.02926 to 0.2875	Yes	*	0.0146	C	Oligo
1.05349	0.935496	0.978794	1.11225		Veh vs. AA	-0.1556	-0.2848 to -0.02654	Yes	*	0.0164	D	AA
					Test details	Mean 1	Mean 2	Mean Diff.	SE of diff.	n1	n2	q	DF
					Veh vs. FCCP	1	0.8887	0.1113	0.05082	6	6	2.191	20
					Veh vs. Oligo	1	0.8416	0.1584	0.05082	6	6	3.116	20
					Veh vs. AA	1	1.156	-0.1556	0.05082	6	6	3.063	20
