# Supplementary material for: Activation of mTORC1 and c-Jun by Prohibitin1 loss in Schwann cells may link mitochondrial dysfunction to demyelination
Source: eLife. 2021 Sep 14;10:e66278. doi: 10.7554/eLife.66278 (PMC8478418; doi:10.7554/eLife.66278)
Supplement: Figure 3—figure supplement 1—source data 1. [file elife-66278-fig3-figsupp1-data1.xlsx]

## Sheet: Figure 3–figure supplement 1B
Figure 3–figure supplement 1B
	c-Jun +	c-Jun -
Damaged	15	35
Intact	12	370
Table Analyzed	cJUN - Pham P40
P value and statistical significance
Test	Fisher's exact test
P value	<0.0001
P value summary	****
One- or two-sided	Two-sided
Statistically significant (P < 0.05)?	Yes
Data analyzed	c-Jun +	c-Jun -	Total
Damaged	15	35	50
Intact	12	370	382
Total	27	405	432
Percentage of row total	c-Jun +	c-Jun -
Damaged	30.00%	70.00%
Intact	3.14%	96.86%
Percentage of column total	c-Jun +	c-Jun -
Damaged	55.56%	8.64%
Intact	44.44%	91.36%
Percentage of grand total	c-Jun +	c-Jun -
Damaged	3.47%	8.10%
Intact	2.78%	85.65%

## Sheet: Figure 3–figure supplement 1C
Figure 3–figure supplement 1C
	Damaged	Intact
	38.4615	5.46875
	46.6667	2.65487
	10	1.26582
	16.6667	1.6129
Table Analyzed	cJUN - percentage
Column B	Intact
vs.	vs.
Column A	Damaged
Paired t test
P value	0.053
P value summary	ns
Significantly different (P < 0.05)?	No
One- or two-tailed P value?	Two-tailed
t, df	t=3.108, df=3
Number of pairs	4
How big is the difference?
Mean of differences	-25.2
SD of differences	16.21
SEM of differences	8.107
95% confidence interval	-51.00 to 0.6019
R squared (partial eta squared)	0.763
How effective was the pairing?
Correlation coefficient (r)	0.6654
P value (one tailed)	0.1673
P value summary	ns
Was the pairing significantly effective?	No

## Sheet: Figure 3–figure supplement 1E
Figure 3–figure supplement 1E
	p-S6+	p-S6-
Damaged	5	19
Intact	31	146
Table Analyzed	p-S6 - Pham P40
P value and statistical significance
Test	Fisher's exact test
P value	0.7763
P value summary	ns
One- or two-sided	Two-sided
Statistically significant (P < 0.05)?	No
Data analyzed	p-S6+	p-S6-	Total
Damaged	5	19	24
Intact	31	146	177
Total	36	165	201
Percentage of row total	p-S6+	p-S6-
Damaged	20.83%	79.17%
Intact	17.51%	82.49%
Percentage of column total	p-S6+	p-S6-
Damaged	13.89%	11.52%
Intact	86.11%	88.48%
Percentage of grand total	p-S6+	p-S6-
Damaged	2.49%	9.45%
Intact	15.42%	72.64%

## Sheet: Figure 3–figure supplement 1F
Figure 3–figure supplement 1F
	Damaged	Intact
	12.5	14.2857
	37.5	12.7907
	12.5	34.2857
Table Analyzed	p-S6 - percentage
Column B	Intact
vs.	vs.
Column A	Damaged
Paired t test
P value	0.9801
P value summary	ns
Significantly different (P < 0.05)?	No
One- or two-tailed P value?	Two-tailed
t, df	t=0.02817, df=2
Number of pairs	3
How big is the difference?
Mean of differences	-0.3793
SD of differences	23.32
SEM of differences	13.47
95% confidence interval	-58.32 to 57.56
R squared (partial eta squared)	0.0003966
How effective was the pairing?
Correlation coefficient (r)	-0.553
P value (one tailed)	0.3135
P value summary	ns
Was the pairing significantly effective?	No
