# Supplementary material for: Activation of mTORC1 and c-Jun by Prohibitin1 loss in Schwann cells may link mitochondrial dysfunction to demyelination
Source: eLife. 2021 Sep 14;10:e66278. doi: 10.7554/eLife.66278 (PMC8478418; doi:10.7554/eLife.66278)
Supplement: Figure 3—source data 1. [file elife-66278-fig3-data1.xlsx]

## Sheet: Figure 3B
Figure 3B				Table Analyzed	c-Jun - Pham P40
	c-Jun+	c-Jun-		P value and statistical significance
Damaged	46	12		Test	Fisher's exact test
Intact	53	177		P value	<0.0001
				P value summary	****
				One- or two-sided	Two-sided
				Statistically significant (P < 0.05)?	Yes
				Data analyzed	c-Jun+	c-Jun-	Total
				Damaged	46	12	58
				Intact	53	177	230
				Total	99	189	288
				Percentage of row total	c-Jun+	c-Jun-
				Damaged	79.31%	20.69%
				Intact	23.04%	76.96%
				Percentage of column total	c-Jun+	c-Jun-
				Damaged	46.46%	6.35%
				Intact	53.54%	93.65%
				Percentage of grand total	c-Jun+	c-Jun-
				Damaged	15.97%	4.17%
				Intact	18.40%	61.46%

## Sheet: Figure 3C
Figure 3C				Table Analyzed	cJUN - percentage
Damaged	Intact			Column B	Intact
75	8.51064			vs.	vs.
83.3333	29.6875			Column A	Damaged
76.9231	21.9512
80	32.4324			Paired t test
				P value	0.0008
				P value summary	***
				Significantly different (P < 0.05)?	Yes
				One- or two-tailed P value?	Two-tailed
				t, df	t=14.09, df=3
				Number of pairs	4
				How big is the difference?
				Mean of differences	-55.67
				SD of differences	7.901
				SEM of differences	3.951
				95% confidence interval	-68.24 to -43.10
				R squared (partial eta squared)	0.9851
				How effective was the pairing?
				Correlation coefficient (r)	0.8407
				P value (one tailed)	0.0796
				P value summary	ns
				Was the pairing significantly effective?	No

## Sheet: Figure 3E
Figure 3E				Table Analyzed	p-S6 - Pham P40
	p-S6+	p-S6-		P value and statistical significance
Damaged	10	29		Test	Fisher's exact test
Intact	56	239		P value	0.3907
				P value summary	ns
				One- or two-sided	Two-sided
				Statistically significant (P < 0.05)?	No
				Data analyzed	p-S6+	p-S6-	Total
				Damaged	10	29	39
				Intact	56	239	295
				Total	66	268	334
				Percentage of row total	p-S6+	p-S6-
				Damaged	25.64%	74.36%
				Intact	18.98%	81.02%
				Percentage of column total	p-S6+	p-S6-
				Damaged	15.15%	10.82%
				Intact	84.85%	89.18%
				Percentage of grand total	p-S6+	p-S6-
				Damaged	2.99%	8.68%
				Intact	16.77%	71.56%

## Sheet: Figure 3F
Figure 3F				Table Analyzed	p-S6 - percentage
Damaged	Intact			Column B	Intact
14.2857	28.8136			vs.	vs.
30.7692	21.5686			Column A	Damaged
26.3158	15.1351
				Paired t test
				P value	0.8352
				P value summary	ns
				Significantly different (P < 0.05)?	No
				One- or two-tailed P value?	Two-tailed
				t, df	t=0.2362, df=2
				Number of pairs	3
				How big is the difference?
				Mean of differences	-1.951
				SD of differences	14.31
				SEM of differences	8.259
				95% confidence interval	-37.49 to 33.59
				R squared (partial eta squared)	0.02715
				How effective was the pairing?
				Correlation coefficient (r)	-0.7293
				P value (one tailed)	0.2399
				P value summary	ns
				Was the pairing significantly effective?	No
