# Supplementary material for: Activation of mTORC1 and c-Jun by Prohibitin1 loss in Schwann cells may link mitochondrial dysfunction to demyelination
Source: eLife. 2021 Sep 14;10:e66278. doi: 10.7554/eLife.66278 (PMC8478418; doi:10.7554/eLife.66278)
Supplement: Figure 4—figure supplement 1—source data 2. [file elife-66278-fig4-figsupp1-data2.xlsx]

## Sheet: Figure 4–figure supplement 1A
Figure 4–figure supplement 1A
Upregulated P20
	Control					Phb1-SCKO							Significant?	P value	Mean of Control	Mean of Phb1-SCKO	Difference	SE of difference	t ratio	df
Gdnf	0.630302	0.912173	1.14653	0.915732	1.39526	2.48902	6.49982	4.69541	6.62744	7.26109		Gdnf	Yes	0.000882	1	5.51455	-4.51455	0.877887	5.14252	8
Shh	0.60106	1.8905	0.715464	1.21679	0.57619	2.61963	1.83326	3.80851	2.78759	4.17548		Shh	Yes	0.003172	1	3.04489	-2.04489	0.491741	4.15848	8
Olig1	0.410534	2.02979	0.529739	1.02729	1.00265	1.27702	0.923436	0.790213	0.828103	0.457845		Olig1	No	0.657513	1	0.855324	0.144676	0.314267	0.46036	8
Downregulated P20
	Control					Phb1-SCKO							Significant?	P value	Mean of Control	Mean of Phb1-SCKO	Difference	SE of difference	t ratio	df
Cdh1	1.12439	1.09155	0.710867	0.934443	1.13874	0.950936	0.636469	0.756033	0.725405	0.68097		Cdh1	Yes	0.033254	1	0.749963	0.250037	0.0973837	2.56755	8
Mbp	1.30704	0.806673	0.749666	1.03573	1.10089	0.584297	0.648478	0.658999	0.698301	0.715476		Mbp	Yes	0.011533	1	0.66111	0.33889	0.103965	3.25966	8
Mpz	1.17482	1.17093	0.765707	0.952218	0.936328	0.86276	0.595257	0.540642	0.614717	0.554657		Mpz	Yes	0.005569	1	0.633607	0.366393	0.0975249	3.75692	8
Upredulated P40
	Control					Phb1-SCKO							Significant?	P value	Mean of Control	Mean of Phb1-SCKO	Difference	SE of difference	t ratio	df
Gdnf	1.22936	1.17704	0.933979	0.721096	0.938519	11.8321	8.79011	10.6337	8.34163	11.7775		Gdnf	Yes	2e-06	1	10.275	-9.27502	0.739036	12.5502	8
Shh	1.56504	1.18513	0.824913	0.473431	0.951482	1.65493	1.18733	2.48329	3.55106	4.38422		Shh	Yes	0.028229	1	2.65217	-1.65217	0.618086	2.67304	8
Olig1	1.6936	0.870527	0.752939	0.480726	1.20221	1.86534	0.603767	0.251097	0.367727	0.344597		Olig1	No	0.416189	1	0.686506	0.313494	0.365651	0.85736	8
Downregulated P40
	Control					Phb1-SCKO							Significant?	P value	Mean of Control	Mean of Phb1-SCKO	Difference	SE of difference	t ratio	df
Cdh1	1.59576	1.02724	0.85847	0.683088	0.835447	0.519998	0.486537	0.426929	0.517716	0.434595		Cdh1	Yes	0.011346	1	0.477155	0.522845	0.159861	3.27061	8
Mbp	1.50225	1.06496	0.82327	0.704471	0.905046	0.292287	0.232851	0.20967	0.257885	0.208572		Mbp	Yes	0.000611	1	0.240253	0.759747	0.139477	5.4471	8
Mpz	1.69116	0.893241	0.692477	0.785574	0.93755	0.217874	0.218298	0.13855	0.19186	0.170288		Mpz	Yes	0.001876	1	0.187374	0.812626	0.178624	4.54938	8

## Sheet: Figure 4–figure supplement 1D
Figure 4–figure supplement 1D
MLKL
	Control										Phb1-SCKO													Significant?	P value	Mean of Control	Mean of Phb1-SCKO	Difference	SE of difference	t ratio	df
P20	1.14442	0.860013	0.995569	1.00985	0.990151						1.73644	1.30714	1.38728	1.08962	1.42453	2.53859	2.56856						P20	Yes	0.025173	1	1.72174	-0.721736	0.27445	2.62975	10
P40	0.923555	1.01992	1.05653	0.918602	0.792287	1.28911					4.27654	2.52009	2.64251	3.18528	1.98429	2.54444	1.79789						P40	Yes	0.000444	1	2.70729	-1.70729	0.345788	4.9374	11
p62
	Control										Phb1-SCKO													Significant?	P value	Mean of Control	Mean of Phb1-SCKO	Difference	SE of difference	t ratio	df
P20	0.658036	1.09022	1.25174	0.989067	1.01093	0.662536	1.16755	1.16992			1.47784	1.49074	1.47887	0.544459	1.57076	1.22748	1.07151	2.27189	2.42774				P20	Yes	0.033842	1	1.50681	-0.50681	0.217038	2.33512	15
P40	0.657738	1.26971	1.07255	1.01316	1.12623	0.860607	0.88801	1.1058	1.00619		1.68433	1.08553	1.77547	1.33364	0.881081	0.569296	1.22234	2.17038	2.87366	2.57308			P40	Yes	0.027123	1	1.61688	-0.616881	0.255126	2.41795	17
ATG7
	Control										Phb1-SCKO													Significant?	P value	Mean of Control	Mean of Phb1-SCKO	Difference	SE of difference	t ratio	df
P20	1.04527	0.90534	1.0494	1.00747	0.992532	0.941543	0.95692	1.10154			1.09163	1.25278	1.22107	1.16167	1.00953	1.02075	1.57409	1.3968	1.06987				P20	Yes	0.011873	1	1.1998	-0.199799	0.0698095	2.86206	15
P40	0.985795	0.952668	1.06154	0.932024	1.14738	0.920593	0.945563	0.980253	1.07418		1.17214	1.04885	0.898788	1.01134	1.55939	1.26857	1.46787	1.30728	2.07414	2.66024	2.90909		P40	Yes	0.02056	1	1.57979	-0.579789	0.228339	2.53916	18
LC3II/LC3I
	Control										Phb1-SCKO													Significant?	P value	Mean of Control	Mean of Phb1-SCKO	Difference	SE of difference	t ratio	df
P20	0.978316	1.04496	0.97672	0.906223	1.09378	0.809851	0.835554	1.35459			1.72252	1.42138	1.689	3.03346	2.2253	0.840452	2.12787	2.85979					P20	Yes	0.002222	1	1.98997	-0.98997	0.265121	3.73403	14
P40	1.14934	0.95824	0.892419	1.13039	0.962478	0.907136	0.918968	0.954415	1.12662		1.35537	1.68395	1.53558	1.71079	2.34459	2.37462	1.74031	2.40508	0.704091	0.988929	0.841454		P40	Yes	0.008298	1	1.60771	-0.607706	0.204981	2.96469	18
