# Supplementary material for: Activation of mTORC1 and c-Jun by Prohibitin1 loss in Schwann cells may link mitochondrial dysfunction to demyelination
Source: eLife. 2021 Sep 14;10:e66278. doi: 10.7554/eLife.66278 (PMC8478418; doi:10.7554/eLife.66278)
Supplement: Figure 4—source data 1. [file elife-66278-fig4-data1.xlsx]

## Sheet: Figure 4B
Figure 4B				Table Analyzed	c-Jun-myelin P40
	Myelin ovoids	No ovoids		P value and statistical significance
c-Jun +	26	37		Test	Fisher's exact test
c-Jun -	0	87		P value	<0.0001
				P value summary	****
				One- or two-sided	Two-sided
				Statistically significant (P < 0.05)?	Yes
				Data analyzed	Myelin ovoids (P0)	No ovoids	Total
				c-Jun +	26	37	63
				c-Jun -	0	87	87
				Total	26	124	150
				Percentage of row total	Myelin ovoids (P0)	No ovoids
				c-Jun +	41.27%	58.73%
				c-Jun -	0.00%	100.00%
				Percentage of column total	Myelin ovoids (P0)	No ovoids
				c-Jun +	100.00%	29.84%
				c-Jun -	0.00%	70.16%
				Percentage of grand total	Myelin ovoids (P0)	No ovoids
				c-Jun +	17.33%	24.67%
				c-Jun -	0.00%	58.00%

## Sheet: Figure 4C
Figure 4C				Table Analyzed	JUN-myelin P40 - percentage
No ovoids	Ovoids			Column B	Ovoids
16	100			vs.	vs.
34.6154	100			Column A	No ovoids
36.9565	100
25.9259	100			Paired t test
				P value	0.0006
				P value summary	***
				Significantly different (P < 0.05)?	Yes
				One- or two-tailed P value?	Two-tailed
				t, df	t=15.05, df=3
				Number of pairs	4
				How big is the difference?
				Mean of differences	71.63
				SD of differences	9.517
				SEM of differences	4.759
				95% confidence interval	56.48 to 86.77
				R squared (partial eta squared)	0.9869
				How effective was the pairing?
				Correlation coefficient (r)	Vertical line
				P value (one tailed)
				P value summary
				Was the pairing significantly effective?

## Sheet: Figure 4E
Figure 4E				Table Analyzed	p-S6-myelin P40
	Myelin ovoids	No ovoids		P value and statistical significance
p-S6 +	14	34		Test	Fisher's exact test
p-S6 -	13	186		P value	<0.0001
				P value summary	****
				One- or two-sided	Two-sided
				Statistically significant (P < 0.05)?	Yes
				Data analyzed	Myelin ovoids (P0)	No ovoids	Total
				p-S6 +	14	34	48
				p-S6 -	13	186	199
				Total	27	220	247
				Percentage of row total	Myelin ovoids (P0)	No ovoids
				p-S6 +	29.17%	70.83%
				p-S6 -	6.53%	93.47%
				Percentage of column total	Myelin ovoids (P0)	No ovoids
				p-S6 +	51.85%	15.45%
				p-S6 -	48.15%	84.55%
				Percentage of grand total	Myelin ovoids (P0)	No ovoids
				p-S6 +	5.67%	13.77%
				p-S6 -	5.26%	75.30%

## Sheet: Figure 4F
Figure 4F				Table Analyzed	p-S6-myelin P40 - percentage
No ovoids	Ovoids			Column B	Ovoids
11.6505	33.3333			vs.	vs.
17.2414	57.1429			Column A	No ovoids
13.5135	16.6667
31.8182	87.5			Paired t test
				P value	0.0769
				P value summary	ns
				Significantly different (P < 0.05)?	No
				One- or two-tailed P value?	Two-tailed
				t, df	t=2.651, df=3
				Number of pairs	4
				How big is the difference?
				Mean of differences	30.1
				SD of differences	22.71
				SEM of differences	11.36
				95% confidence interval	-6.035 to 66.24
				R squared (partial eta squared)	0.7008
				How effective was the pairing?
				Correlation coefficient (r)	0.914
				P value (one tailed)	0.043
				P value summary	*
				Was the pairing significantly effective?	Yes
