# Supplementary material for: Activation of mTORC1 and c-Jun by Prohibitin1 loss in Schwann cells may link mitochondrial dysfunction to demyelination
Source: eLife. 2021 Sep 14;10:e66278. doi: 10.7554/eLife.66278 (PMC8478418; doi:10.7554/eLife.66278)
Supplement: Figure 5—figure supplement 1—source data 1. [file elife-66278-fig5-figsupp1-data1.xlsx]

## Sheet: Figure 5–figure supplement 1A
Figure 5–figure supplement 1D
p-4E-BP1/4E-BP1															p-S6/S6
	Control						Phb1 SCKO									Control						Phb1 SCKO
Veh	1.28343	0.979206	0.737365	1.05916	0.959852	0.980987	1.83358	1.19154	0.771109	1.46161					Veh	1.17331	1.05846	0.768234	1.10716	1.02844	0.864399	1.62985	2.03413	0.835039	0.645576
ISRIB	0.643946	1.05807	1.48608	1.2429	0.89183	0.98915	0.609766	0.7844	0.808194	1.31478	2.00382	1.06734			ISRIB	0.803695	1.36294	1.54238	0.662106	0.791716	0.909928	1.02303	1.67586	2.16141	0.551823	0.901895	0.927172
Compare cell means regardless of rows and columns															Compare cell means regardless of rows and columns
Number of families	1														Number of families	1
Number of comparisons per family	6														Number of comparisons per family	6
Alpha	0.05														Alpha	0.05
Holm-Sidak's multiple comparisons test	Predicted (LS) mean diff.	Significant?	Summary	Adjusted P Value											Tukey's multiple comparisons test	Predicted (LS) mean diff.	95.00% CI of diff.	Significant?	Summary
Veh:Control vs. Veh:Phb1 SCKO	-0.3145	No	ns	0.747											Veh:Control vs. Veh:Phb1 SCKO	-0.2861	-1.125 to 0.5525	No	ns
Veh:Control vs. ISRIB:Control	-0.052	No	ns	0.9641											Veh:Control vs. ISRIB:Control	-0.01213	-0.7622 to 0.7380	No	ns
Veh:Control vs. ISRIB:Phb1 SCKO	-0.09805	No	ns	0.9578											Veh:Control vs. ISRIB:Phb1 SCKO	-0.2069	-0.9570 to 0.5432	No	ns
Veh:Phb1 SCKO vs. ISRIB:Control	0.2625	No	ns	0.8151											Veh:Phb1 SCKO vs. ISRIB:Control	0.274	-0.5646 to 1.113	No	ns
Veh:Phb1 SCKO vs. ISRIB:Phb1 SCKO	0.2164	No	ns	0.8495											Veh:Phb1 SCKO vs. ISRIB:Phb1 SCKO	0.07928	-0.7594 to 0.9179	No	ns
ISRIB:Control vs. ISRIB:Phb1 SCKO	-0.04605	No	ns	0.9641											ISRIB:Control vs. ISRIB:Phb1 SCKO	-0.1947	-0.9448 to 0.5554	No	ns
Test details	Predicted (LS) mean 1	Predicted (LS) mean 2	Predicted (LS) mean diff.	SE of diff.	N1	N2	t	DF							Test details	Predicted (LS) mean 1	Predicted (LS) mean 2	Predicted (LS) mean diff.	SE of diff.	N1	N2	q	DF
Veh:Control vs. Veh:Phb1 SCKO	1	1.314	-0.3145	0.239	6	4	1.316	18							Veh:Control vs. Veh:Phb1 SCKO	1	1.286	-0.2861	0.2967	6	4	1.364	18
Veh:Control vs. ISRIB:Control	1	1.052	-0.052	0.2137	6	6	0.2433	18							Veh:Control vs. ISRIB:Control	1	1.012	-0.01213	0.2654	6	6	0.06462	18
Veh:Control vs. ISRIB:Phb1 SCKO	1	1.098	-0.09805	0.2137	6	6	0.4587	18							Veh:Control vs. ISRIB:Phb1 SCKO	1	1.207	-0.2069	0.2654	6	6	1.102	18
Veh:Phb1 SCKO vs. ISRIB:Control	1.314	1.052	0.2625	0.239	4	6	1.098	18							Veh:Phb1 SCKO vs. ISRIB:Control	1.286	1.012	0.274	0.2967	4	6	1.306	18
Veh:Phb1 SCKO vs. ISRIB:Phb1 SCKO	1.314	1.098	0.2164	0.239	4	6	0.9056	18							Veh:Phb1 SCKO vs. ISRIB:Phb1 SCKO	1.286	1.207	0.07928	0.2967	4	6	0.3779	18
ISRIB:Control vs. ISRIB:Phb1 SCKO	1.052	1.098	-0.04605	0.2137	6	6	0.2155	18							ISRIB:Control vs. ISRIB:Phb1 SCKO	1.012	1.207	-0.1947	0.2654	6	6	1.038	18
