# Supplementary material for: Activation of mTORC1 and c-Jun by Prohibitin1 loss in Schwann cells may link mitochondrial dysfunction to demyelination
Source: eLife. 2021 Sep 14;10:e66278. doi: 10.7554/eLife.66278 (PMC8478418; doi:10.7554/eLife.66278)
Supplement: Figure 5—source data 2. [file elife-66278-fig5-data2.xlsx]

## Sheet: Figure 5C
Figue 5C
c-Jun		Control						Phb1 SCKO
	Veh	0.828967	1.03658	1.13446	0.990149	0.967532	1.04232	3.73855	3.83167	3.54267	4.35994
	ISRIB	1.26542	0.960566	0.617414	1.39958	1.23802	1.14678	4.17043	3.27807	5.80599	2.99064	5.27869	3.97652
Compare cell means regardless of rows and columns
Number of families	1
Number of comparisons per family	6
Alpha	0.05
Holm-Sidak's multiple comparisons test	Predicted (LS) mean diff.	Significant?	Summary	Adjusted P Value
Veh:Control vs. Veh:Phb1 SCKO	-2.868	Yes	****	<0.0001
Veh:Control vs. ISRIB:Control	-0.1046	No	ns	0.7731
Veh:Control vs. ISRIB:Phb1 SCKO	-3.25	Yes	****	<0.0001
Veh:Phb1 SCKO vs. ISRIB:Control	2.764	Yes	****	<0.0001
Veh:Phb1 SCKO vs. ISRIB:Phb1 SCKO	-0.3818	No	ns	0.5801
ISRIB:Control vs. ISRIB:Phb1 SCKO	-3.145	Yes	****	<0.0001
Test details	Predicted (LS) mean 1	Predicted (LS) mean 2	Predicted (LS) mean diff.	SE of diff.	N1	N2	t	DF
Veh:Control vs. Veh:Phb1 SCKO	1	3.868	-2.868	0.3996	6	4	7.177	18
Veh:Control vs. ISRIB:Control	1	1.105	-0.1046	0.3574	6	6	0.2927	18
Veh:Control vs. ISRIB:Phb1 SCKO	1	4.25	-3.25	0.3574	6	6	9.093	18
Veh:Phb1 SCKO vs. ISRIB:Control	3.868	1.105	2.764	0.3996	4	6	6.915	18
Veh:Phb1 SCKO vs. ISRIB:Phb1 SCKO	3.868	4.25	-0.3818	0.3996	4	6	0.9555	18
ISRIB:Control vs. ISRIB:Phb1 SCKO	1.105	4.25	-3.145	0.3574	6	6	8.8	18
p-4E-BP1		Control						Phb1 SCKO
	Veh	1.05733	0.858618	1.08405	1.04481	0.943472	1.01172	7.11032	5.2234	4.29395	5.77966
	ISRIB	1.00841	1.66183	1.41219	1.26326	1.07911	0.939847	2.86605	2.94121	3.38714	2.84724	3.9485	2.77338
Compare cell means regardless of rows and columns
Number of families	1
Number of comparisons per family	6
Alpha	0.05
Holm-Sidak's multiple comparisons test	Predicted (LS) mean diff.	Significant?	Summary	Adjusted P Value
Veh:Control vs. Veh:Phb1 SCKO	-4.602	Yes	****	<0.0001
Veh:Control vs. ISRIB:Control	-0.2274	No	ns	0.4899
Veh:Control vs. ISRIB:Phb1 SCKO	-2.127	Yes	****	<0.0001
Veh:Phb1 SCKO vs. ISRIB:Control	4.374	Yes	****	<0.0001
Veh:Phb1 SCKO vs. ISRIB:Phb1 SCKO	2.475	Yes	****	<0.0001
ISRIB:Control vs. ISRIB:Phb1 SCKO	-1.9	Yes	****	<0.0001
Test details	Predicted (LS) mean 1	Predicted (LS) mean 2	Predicted (LS) mean diff.	SE of diff.	N1	N2	t	DF
Veh:Control vs. Veh:Phb1 SCKO	1	5.602	-4.602	0.3607	6	4	12.76	18
Veh:Control vs. ISRIB:Control	1	1.227	-0.2274	0.3227	6	6	0.7049	18
Veh:Control vs. ISRIB:Phb1 SCKO	1	3.127	-2.127	0.3227	6	6	6.593	18
Veh:Phb1 SCKO vs. ISRIB:Control	5.602	1.227	4.374	0.3607	4	6	12.13	18
Veh:Phb1 SCKO vs. ISRIB:Phb1 SCKO	5.602	3.127	2.475	0.3607	4	6	6.86	18
ISRIB:Control vs. ISRIB:Phb1 SCKO	1.227	3.127	-1.9	0.3227	6	6	5.888	18
4E-BP1		Control						Phb1 SCKO
	Veh	0.779445	0.829605	1.39095	0.986216	0.982701	1.03108	3.6689	4.14756	5.26849	3.95338
	ISRIB	1.48161	1.48599	0.899078	1.01615	1.20971	0.949931	4.44698	3.54759	3.96518	2.16505	1.97002	2.5978
Number of comparisons per family	6
Alpha	0.05
Holm-Sidak's multiple comparisons test	Predicted (LS) mean diff.	Significant?	Summary	Adjusted P Value
Veh:Control vs. Veh:Phb1 SCKO	-3.26	Yes	****	<0.0001
Veh:Control vs. ISRIB:Control	-0.1737	No	ns	0.6403
Veh:Control vs. ISRIB:Phb1 SCKO	-2.115	Yes	****	<0.0001
Veh:Phb1 SCKO vs. ISRIB:Control	3.086	Yes	****	<0.0001
Veh:Phb1 SCKO vs. ISRIB:Phb1 SCKO	1.144	Yes	*	0.0235
ISRIB:Control vs. ISRIB:Phb1 SCKO	-1.942	Yes	***	0.0001
Test details	Predicted (LS) mean 1	Predicted (LS) mean 2	Predicted (LS) mean diff.	SE of diff.	N1	N2	t	DF
Veh:Control vs. Veh:Phb1 SCKO	1	4.26	-3.26	0.4086	6	4	7.977	18
Veh:Control vs. ISRIB:Control	1	1.174	-0.1737	0.3655	6	6	0.4754	18
Veh:Control vs. ISRIB:Phb1 SCKO	1	3.115	-2.115	0.3655	6	6	5.788	18
Veh:Phb1 SCKO vs. ISRIB:Control	4.26	1.174	3.086	0.4086	4	6	7.551	18
Veh:Phb1 SCKO vs. ISRIB:Phb1 SCKO	4.26	3.115	1.144	0.4086	4	6	2.8	18
ISRIB:Control vs. ISRIB:Phb1 SCKO	1.174	3.115	-1.942	0.3655	6	6	5.312	18
p-S6		Control						Phb1 SCKO
	Veh	1.0082	0.865996	1.1258	1.14549	0.992315	0.862197	3.16201	4.46565	1.97432	1.20848
	ISRIB	1.12447	1.15747	1.51304	0.620004	0.745453	0.751066	2.44444	2.8807	4.21341	0.809738	1.4344	1.13605
Compare cell means regardless of rows and columns
Number of families	1
Number of comparisons per family	6
Alpha	0.05
Holm-Sidak's multiple comparisons test	Predicted (LS) mean diff.	Significant?	Summary	Adjusted P Value
Veh:Control vs. Veh:Phb1 SCKO	-1.703	No	ns	0.0536
Veh:Control vs. ISRIB:Control	0.01475	No	ns	0.9779
Veh:Control vs. ISRIB:Phb1 SCKO	-1.153	No	ns	0.1489
Veh:Phb1 SCKO vs. ISRIB:Control	1.717	No	ns	0.0536
Veh:Phb1 SCKO vs. ISRIB:Phb1 SCKO	0.5495	No	ns	0.5936
ISRIB:Control vs. ISRIB:Phb1 SCKO	-1.168	No	ns	0.1489
Test details	Predicted (LS) mean 1	Predicted (LS) mean 2	Predicted (LS) mean diff.	SE of diff.	N1	N2	t	DF
Veh:Control vs. Veh:Phb1 SCKO	1	2.703	-1.703	0.5882	6	4	2.895	18
Veh:Control vs. ISRIB:Control	1	0.9853	0.01475	0.5261	6	6	0.02803	18
Veh:Control vs. ISRIB:Phb1 SCKO	1	2.153	-1.153	0.5261	6	6	2.192	18
Veh:Phb1 SCKO vs. ISRIB:Control	2.703	0.9853	1.717	0.5882	4	6	2.92	18
Veh:Phb1 SCKO vs. ISRIB:Phb1 SCKO	2.703	2.153	0.5495	0.5882	4	6	0.9343	18
ISRIB:Control vs. ISRIB:Phb1 SCKO	0.9853	2.153	-1.168	0.5261	6	6	2.22	18
S6		Control						Phb1 SCKO
	Veh	0.820217	0.780969	1.39881	1.03568	0.965854	0.998469	1.85186	2.09554	2.25685	1.87385
	ISRIB	1.33552	0.810636	0.93638	0.937368	0.942527	0.826254	2.28079	1.64079	1.86075	1.46888	1.59205	1.22654
Compare cell means regardless of rows and columns
Number of families	1
Number of comparisons per family	6
Alpha	0.05
Holm-Sidak's multiple comparisons test	Predicted (LS) mean diff.	Significant?	Summary	Adjusted P Value
Veh:Control vs. Veh:Phb1 SCKO	-1.02	Yes	****	<0.0001
Veh:Control vs. ISRIB:Control	0.03522	No	ns	0.815
Veh:Control vs. ISRIB:Phb1 SCKO	-0.6783	Yes	***	0.0007
Veh:Phb1 SCKO vs. ISRIB:Control	1.055	Yes	****	<0.0001
Veh:Phb1 SCKO vs. ISRIB:Phb1 SCKO	0.3412	No	ns	0.106
ISRIB:Control vs. ISRIB:Phb1 SCKO	-0.7135	Yes	***	0.0006
Test details	Predicted (LS) mean 1	Predicted (LS) mean 2	Predicted (LS) mean diff.	SE of diff.	N1	N2	t	DF
Veh:Control vs. Veh:Phb1 SCKO	1	2.02	-1.02	0.1659	6	4	6.146	18
Veh:Control vs. ISRIB:Control	1	0.9648	0.03522	0.1484	6	6	0.2374	18
Veh:Control vs. ISRIB:Phb1 SCKO	1	1.678	-0.6783	0.1484	6	6	4.572	18
Veh:Phb1 SCKO vs. ISRIB:Control	2.02	0.9648	1.055	0.1659	4	6	6.358	18
Veh:Phb1 SCKO vs. ISRIB:Phb1 SCKO	2.02	1.678	0.3412	0.1659	4	6	2.057	18
ISRIB:Control vs. ISRIB:Phb1 SCKO	0.9648	1.678	-0.7135	0.1484	6	6	4.809	18
Opa1-L/Opa1-s		Control						Phb1 SCKO
	Veh	1.06318	0.981873	0.954944	0.972288	0.966751	1.06096	0.760286	0.563499	0.605257	0.392976
	ISRIB	1.02559	1.03232	1.08419	1.08357	1.0513	0.846096	0.815163	0.677896	0.76159	0.597834	0.642969	0.737329
Compare cell means regardless of rows and columns
Number of families	1
Number of comparisons per family	6
Alpha	0.05
Holm-Sidak's multiple comparisons test	Predicted (LS) mean diff.	Significant?	Summary	Adjusted P Value
Veh:Control vs. Veh:Phb1 SCKO	0.4195	Yes	****	<0.0001
Veh:Control vs. ISRIB:Control	-0.02051	No	ns	0.7039
Veh:Control vs. ISRIB:Phb1 SCKO	0.2945	Yes	****	<0.0001
Veh:Phb1 SCKO vs. ISRIB:Control	-0.44	Yes	****	<0.0001
Veh:Phb1 SCKO vs. ISRIB:Phb1 SCKO	-0.125	No	ns	0.0969
ISRIB:Control vs. ISRIB:Phb1 SCKO	0.315	Yes	****	<0.0001
Test details	Predicted (LS) mean 1	Predicted (LS) mean 2	Predicted (LS) mean diff.	SE of diff.	N1	N2	t	DF
Veh:Control vs. Veh:Phb1 SCKO	1	0.5805	0.4195	0.05938	6	4	7.064	18
Veh:Control vs. ISRIB:Control	1	1.021	-0.02051	0.05311	6	6	0.3861	18
Veh:Control vs. ISRIB:Phb1 SCKO	1	0.7055	0.2945	0.05311	6	6	5.545	18
Veh:Phb1 SCKO vs. ISRIB:Control	0.5805	1.021	-0.44	0.05938	4	6	7.409	18
Veh:Phb1 SCKO vs. ISRIB:Phb1 SCKO	0.5805	0.7055	-0.125	0.05938	4	6	2.104	18
ISRIB:Control vs. ISRIB:Phb1 SCKO	1.021	0.7055	0.315	0.05311	6	6	5.931	18
BiP		Control						Phb1 SCKO
	Veh	0.654552	1.14734	1.19811	1.09091	0.989965	0.919124	3.33285	2.40638	1.75	3.99853
	ISRIB	1.43359	1.85544	1.47958	1.94904	1.4653	0.822027	1.48299	1.50652	1.80181	1.2447	3.14252	1.69022
Compare cell means regardless of rows and columns
Number of families	1
Number of comparisons per family	6
Alpha	0.05
Holm-Sidak's multiple comparisons test	Predicted (LS) mean diff.	Significant?	Summary	Adjusted P Value
Veh:Control vs. Veh:Phb1 SCKO	-1.872	Yes	***	0.0007
Veh:Control vs. ISRIB:Control	-0.5008	No	ns	0.2917
Veh:Control vs. ISRIB:Phb1 SCKO	-0.8115	No	ns	0.0826
Veh:Phb1 SCKO vs. ISRIB:Control	1.371	Yes	*	0.0101
Veh:Phb1 SCKO vs. ISRIB:Phb1 SCKO	1.06	Yes	*	0.0478
ISRIB:Control vs. ISRIB:Phb1 SCKO	-0.3106	No	ns	0.3734
Test details	Predicted (LS) mean 1	Predicted (LS) mean 2	Predicted (LS) mean diff.	SE of diff.	N1	N2	t	DF
Veh:Control vs. Veh:Phb1 SCKO	1	2.872	-1.872	0.3805	6	4	4.92	18
Veh:Control vs. ISRIB:Control	1	1.501	-0.5008	0.3403	6	6	1.472	18
Veh:Control vs. ISRIB:Phb1 SCKO	1	1.811	-0.8115	0.3403	6	6	2.384	18
Veh:Phb1 SCKO vs. ISRIB:Control	2.872	1.501	1.371	0.3805	4	6	3.603	18
Veh:Phb1 SCKO vs. ISRIB:Phb1 SCKO	2.872	1.811	1.06	0.3805	4	6	2.787	18
ISRIB:Control vs. ISRIB:Phb1 SCKO	1.501	1.811	-0.3106	0.3403	6	6	0.9127	18
