# Supplementary material for: Activation of mTORC1 and c-Jun by Prohibitin1 loss in Schwann cells may link mitochondrial dysfunction to demyelination
Source: eLife. 2021 Sep 14;10:e66278. doi: 10.7554/eLife.66278 (PMC8478418; doi:10.7554/eLife.66278)
Supplement: Figure 6—figure supplement 1—source data 2. [file elife-66278-fig6-figsupp1-data2.xlsx]

## Sheet: Figure 6–figure supplement 1B
Figure 6–figure supplement 1B
p-4E-BP1	Control						Phb1 SCKO						Phb1 SCKO; JUN Het						Phb1; JUN SCKO
	0.694143	1.03675	1.26911	0.987587	0.98604	1.02637	6.97574	5.66053	5.42959	5.61702	3.1988	5.99127	4.79961	3.95755	5.0685	3.06576	4.09059	5.21613	3.9076	3.3694	3.85684	2.76087	0.780314	3.31881
Number of families	1
Number of comparisons per family	6
Alpha	0.05
Holm-Sidak's multiple comparisons test	Mean Diff.	Significant?	Summary	Adjusted P Value
Control vs. Phb1 SCKO	-4.479	Yes	****	<0.0001	A-B
Control vs. Phb1 SCKO; JUN Het	-3.366	Yes	****	<0.0001	A-C
Control vs. Phb1; JUN SCKO	-1.999	Yes	**	0.0048	A-D
Phb1 SCKO vs. Phb1 SCKO; JUN Het	1.112	No	ns	0.056	B-C
Phb1 SCKO vs. Phb1; JUN SCKO	2.48	Yes	***	0.0008	B-D
Phb1 SCKO; JUN Het vs. Phb1; JUN SCKO	1.367	Yes	*	0.0426	C-D
Test details	Mean 1	Mean 2	Mean Diff.	SE of diff.	n1	n2	t	DF
Control vs. Phb1 SCKO	1	5.479	-4.479	0.5484	6	6	8.168	20
Control vs. Phb1 SCKO; JUN Het	1	4.366	-3.366	0.5484	6	6	6.139	20
Control vs. Phb1; JUN SCKO	1	2.999	-1.999	0.5484	6	6	3.645	20
Phb1 SCKO vs. Phb1 SCKO; JUN Het	5.479	4.366	1.112	0.5484	6	6	2.029	20
Phb1 SCKO vs. Phb1; JUN SCKO	5.479	2.999	2.48	0.5484	6	6	4.522	20
Phb1 SCKO; JUN Het vs. Phb1; JUN SCKO	4.366	2.999	1.367	0.5484	6	6	2.494	20
4E-BP1	Control						Phb1 SCKO						Phb1 SCKO; JUN Het						Phb1; JUN SCKO
	0.828387	0.920441	1.25117	0.873987	0.9031	1.22291	4.48573	4.27496	4.51576	3.02408	1.98982	2.66614	4.86467	4.96433	5.17398	2.26168	2.60169	3.00706	3.83056	4.46438	4.83508	3.24515	1.08604	2.20225
Number of families	1
Number of comparisons per family	6
Alpha	0.05
Holm-Sidak's multiple comparisons test	Mean Diff.	Significant?	Summary	Adjusted P Value
Control vs. Phb1 SCKO	-2.493	Yes	**	0.0048	A-B
Control vs. Phb1 SCKO; JUN Het	-2.812	Yes	**	0.0018	A-C
Control vs. Phb1; JUN SCKO	-2.277	Yes	**	0.0083	A-D
Phb1 SCKO vs. Phb1 SCKO; JUN Het	-0.3195	No	ns	0.8596	B-C
Phb1 SCKO vs. Phb1; JUN SCKO	0.2155	No	ns	0.8596	B-D
Phb1 SCKO; JUN Het vs. Phb1; JUN SCKO	0.535	No	ns	0.8008	C-D
Test details	Mean 1	Mean 2	Mean Diff.	SE of diff.	n1	n2	t	DF
Control vs. Phb1 SCKO	1	3.493	-2.493	0.644	6	6	3.87	20
Control vs. Phb1 SCKO; JUN Het	1	3.812	-2.812	0.644	6	6	4.367	20
Control vs. Phb1; JUN SCKO	1	3.277	-2.277	0.644	6	6	3.536	20
Phb1 SCKO vs. Phb1 SCKO; JUN Het	3.493	3.812	-0.3195	0.644	6	6	0.4961	20
Phb1 SCKO vs. Phb1; JUN SCKO	3.493	3.277	0.2155	0.644	6	6	0.3346	20
Phb1 SCKO; JUN Het vs. Phb1; JUN SCKO	3.812	3.277	0.535	0.644	6	6	0.8307	20
p-4E-BP1/4E-BP1	Control						Phb1 SCKO						Phb1 SCKO; JUN Het						Phb1; JUN SCKO
	0.789759	1.25163	0.958608	1.14073	1.14	0.719273	1.20998	1.28263	1.41449	1.85485	2.04652	2.19988	1.22747	1.0915	1.59193	1.72202	1.65579	1.73612	1.43472	1.21939	1.01799	0.970747	0.942935	1.33302
Number of families	1
Number of comparisons per family	6
Alpha	0.05
Holm-Sidak's multiple comparisons test	Mean Diff.	Significant?	Summary	Adjusted P Value
Control vs. Phb1 SCKO	-0.6681	Yes	**	0.0046	A-B
Control vs. Phb1 SCKO; JUN Het	-0.5041	Yes	*	0.0307	A-C
Control vs. Phb1; JUN SCKO	-0.1531	No	ns	0.567	A-D
Phb1 SCKO vs. Phb1 SCKO; JUN Het	0.1639	No	ns	0.567	B-C
Phb1 SCKO vs. Phb1; JUN SCKO	0.5149	Yes	*	0.0307	B-D
Phb1 SCKO; JUN Het vs. Phb1; JUN SCKO	0.351	No	ns	0.1431	C-D
Test details	Mean 1	Mean 2	Mean Diff.	SE of diff.	n1	n2	t	DF
Control vs. Phb1 SCKO	1	1.668	-0.6681	0.1684	6	6	3.967	20
Control vs. Phb1 SCKO; JUN Het	1	1.504	-0.5041	0.1684	6	6	2.994	20
Control vs. Phb1; JUN SCKO	1	1.153	-0.1531	0.1684	6	6	0.9093	20
Phb1 SCKO vs. Phb1 SCKO; JUN Het	1.668	1.504	0.1639	0.1684	6	6	0.9734	20
Phb1 SCKO vs. Phb1; JUN SCKO	1.668	1.153	0.5149	0.1684	6	6	3.058	20
Phb1 SCKO; JUN Het vs. Phb1; JUN SCKO	1.504	1.153	0.351	0.1684	6	6	2.084	20
p-S6	Control						Phb1 SCKO						Phb1 SCKO; JUN Het						Phb1; JUN SCKO
	1.13081	0.764451	1.10474	0.920497	0.922059	1.15744	4.7266	2.70823	2.98692	5.90771	3.75291	2.84333	2.78952	2.69243	5.09938	1.65367	1.51253	1.397	2.65502	2.03878	1.43989	2.05552	1.00886	1.26662
Number of families	1
Number of comparisons per family	6
Alpha	0.05
Holm-Sidak's multiple comparisons test	Mean Diff.	Significant?	Summary	Adjusted P Value
Control vs. Phb1 SCKO	-2.821	Yes	***	0.0005	A-B
Control vs. Phb1 SCKO; JUN Het	-1.524	No	ns	0.0601	A-C
Control vs. Phb1; JUN SCKO	-0.7441	No	ns	0.3442	A-D
Phb1 SCKO vs. Phb1 SCKO; JUN Het	1.297	No	ns	0.1028	B-C
Phb1 SCKO vs. Phb1; JUN SCKO	2.077	Yes	**	0.0087	B-D
Phb1 SCKO; JUN Het vs. Phb1; JUN SCKO	0.78	No	ns	0.3442	C-D
Test details	Mean 1	Mean 2	Mean Diff.	SE of diff.	n1	n2	t	DF
Control vs. Phb1 SCKO	1	3.821	-2.821	0.5751	6	6	4.905	20
Control vs. Phb1 SCKO; JUN Het	1	2.524	-1.524	0.5751	6	6	2.65	20
Control vs. Phb1; JUN SCKO	1	1.744	-0.7441	0.5751	6	6	1.294	20
Phb1 SCKO vs. Phb1 SCKO; JUN Het	3.821	2.524	1.297	0.5751	6	6	2.255	20
Phb1 SCKO vs. Phb1; JUN SCKO	3.821	1.744	2.077	0.5751	6	6	3.611	20
Phb1 SCKO; JUN Het vs. Phb1; JUN SCKO	2.524	1.744	0.78	0.5751	6	6	1.356	20
S6	Control						Phb1 SCKO						Phb1 SCKO; JUN Het						Phb1; JUN SCKO
	1.11095	0.902788	0.986265	0.985605	1.0009	1.01349	2.38357	2.49636	2.03747	2.40464	1.38394	2.09492	2.1905	2.43485	2.67777	1.38229	1.91921	1.52953	2.19029	2.0575	1.0238	1.62485	1.46001	1.39253
Number of families	1
Number of comparisons per family	6
Alpha	0.05
Holm-Sidak's multiple comparisons test	Mean Diff.	Significant?	Summary	Adjusted P Value
Control vs. Phb1 SCKO	-1.133	Yes	***	0.0004	A-B
Control vs. Phb1 SCKO; JUN Het	-1.022	Yes	**	0.0011	A-C
Control vs. Phb1; JUN SCKO	-0.6248	Yes	*	0.0487	A-D
Phb1 SCKO vs. Phb1 SCKO; JUN Het	0.1111	No	ns	0.6304	B-C
Phb1 SCKO vs. Phb1; JUN SCKO	0.5087	No	ns	0.1066	B-D
Phb1 SCKO; JUN Het vs. Phb1; JUN SCKO	0.3975	No	ns	0.1824	C-D
Test details	Mean 1	Mean 2	Mean Diff.	SE of diff.	n1	n2	t	DF
Control vs. Phb1 SCKO	1	2.133	-1.133	0.2274	6	6	4.984	20
Control vs. Phb1 SCKO; JUN Het	1	2.022	-1.022	0.2274	6	6	4.496	20
Control vs. Phb1; JUN SCKO	1	1.625	-0.6248	0.2274	6	6	2.748	20
Phb1 SCKO vs. Phb1 SCKO; JUN Het	2.133	2.022	0.1111	0.2274	6	6	0.4886	20
Phb1 SCKO vs. Phb1; JUN SCKO	2.133	1.625	0.5087	0.2274	6	6	2.237	20
Phb1 SCKO; JUN Het vs. Phb1; JUN SCKO	2.022	1.625	0.3975	0.2274	6	6	1.748	20
p-S6/S6	Control						Phb1 SCKO						Phb1 SCKO; JUN Het						Phb1; JUN SCKO
	0.972678	0.954024	1.0733	0.980944	1.00075	1.0183	1.56436	1.06549	1.7486	2.55258	3.59177	1.38241	1.60634	1.53505	3.13767	1.58123	0.863525	0.951091	1.72855	1.62321	1.81982	1.50181	0.943506	0.837093
Number of families	1
Number of comparisons per family	6
Alpha	0.05
Holm-Sidak's multiple comparisons test	Mean Diff.	Significant?	Summary	Adjusted P Value
Control vs. Phb1 SCKO	-0.9842	No	ns	0.0972	A-B
Control vs. Phb1 SCKO; JUN Het	-0.6125	No	ns	0.4736	A-C
Control vs. Phb1; JUN SCKO	-0.409	No	ns	0.6445	A-D
Phb1 SCKO vs. Phb1 SCKO; JUN Het	0.3717	No	ns	0.6445	B-C
Phb1 SCKO vs. Phb1; JUN SCKO	0.5752	No	ns	0.4736	B-D
Phb1 SCKO; JUN Het vs. Phb1; JUN SCKO	0.2035	No	ns	0.6445	C-D
Test details	Mean 1	Mean 2	Mean Diff.	SE of diff.	n1	n2	t	DF
Control vs. Phb1 SCKO	1	1.984	-0.9842	0.3776	6	6	2.606	20
Control vs. Phb1 SCKO; JUN Het	1	1.612	-0.6125	0.3776	6	6	1.622	20
Control vs. Phb1; JUN SCKO	1	1.409	-0.409	0.3776	6	6	1.083	20
Phb1 SCKO vs. Phb1 SCKO; JUN Het	1.984	1.612	0.3717	0.3776	6	6	0.9844	20
Phb1 SCKO vs. Phb1; JUN SCKO	1.984	1.409	0.5752	0.3776	6	6	1.523	20
Phb1 SCKO; JUN Het vs. Phb1; JUN SCKO	1.612	1.409	0.2035	0.3776	6	6	0.5389	20
p-eIF2a	Control						Phb1 SCKO						Phb1 SCKO; JUN Het						Phb1; JUN SCKO
	0.427015	1.07237	1.50062	1.2129	1.01512	0.771982	4.0703	5.79212	7.87072	3.83752	3.6684	4.37519	8.42813	6.06915	6.36177	3.3134	3.72521	3.15637	4.64588	4.49195	3.72893	4.00022	1.26311	3.27432
Number of families	1
Number of comparisons per family	6
Alpha	0.05
Holm-Sidak's multiple comparisons test	Mean Diff.	Significant?	Summary	Adjusted P Value
Control vs. Phb1 SCKO	-3.936	Yes	***	0.0009	A-B
Control vs. Phb1 SCKO; JUN Het	-4.176	Yes	***	0.0005	A-C
Control vs. Phb1; JUN SCKO	-2.567	Yes	*	0.028	A-D
Phb1 SCKO vs. Phb1 SCKO; JUN Het	-0.24	No	ns	0.7821	B-C
Phb1 SCKO vs. Phb1; JUN SCKO	1.368	No	ns	0.2355	B-D
Phb1 SCKO; JUN Het vs. Phb1; JUN SCKO	1.608	No	ns	0.2084	C-D
Test details	Mean 1	Mean 2	Mean Diff.	SE of diff.	n1	n2	t	DF
Control vs. Phb1 SCKO	1	4.936	-3.936	0.856	6	6	4.598	20
Control vs. Phb1 SCKO; JUN Het	1	5.176	-4.176	0.856	6	6	4.878	20
Control vs. Phb1; JUN SCKO	1	3.567	-2.567	0.856	6	6	2.999	20
Phb1 SCKO vs. Phb1 SCKO; JUN Het	4.936	5.176	-0.24	0.856	6	6	0.2803	20
Phb1 SCKO vs. Phb1; JUN SCKO	4.936	3.567	1.368	0.856	6	6	1.598	20
Phb1 SCKO; JUN Het vs. Phb1; JUN SCKO	5.176	3.567	1.608	0.856	6	6	1.879	20
eIF2a	Control						Phb1 SCKO						Phb1 SCKO; JUN Het						Phb1; JUN SCKO
	0.961187	0.912439	1.12637	0.851784	0.971315	1.1769	2.16078	1.72871	1.67688	1.60483	1.38063	1.70113	1.44445	1.2822	1.42634	1.71019	0.951284	1.62707	1.61742	1.46821	1.48238	1.17251	1.64847	1.68055
Number of families	1
Number of comparisons per family	6
Alpha	0.05
Holm-Sidak's multiple comparisons test	Mean Diff.	Significant?	Summary	Adjusted P Value
Control vs. Phb1 SCKO	-0.7088	Yes	****	<0.0001	A-B
Control vs. Phb1 SCKO; JUN Het	-0.4069	Yes	*	0.0162	A-C
Control vs. Phb1; JUN SCKO	-0.5116	Yes	**	0.0029	A-D
Phb1 SCKO vs. Phb1 SCKO; JUN Het	0.3019	No	ns	0.0758	B-C
Phb1 SCKO vs. Phb1; JUN SCKO	0.1972	No	ns	0.2461	B-D
Phb1 SCKO; JUN Het vs. Phb1; JUN SCKO	-0.1047	No	ns	0.4141	C-D
Test details	Mean 1	Mean 2	Mean Diff.	SE of diff.	n1	n2	t	DF
Control vs. Phb1 SCKO	1	1.709	-0.7088	0.1255	6	6	5.648	20
Control vs. Phb1 SCKO; JUN Het	1	1.407	-0.4069	0.1255	6	6	3.242	20
Control vs. Phb1; JUN SCKO	1	1.512	-0.5116	0.1255	6	6	4.076	20
Phb1 SCKO vs. Phb1 SCKO; JUN Het	1.709	1.407	0.3019	0.1255	6	6	2.406	20
Phb1 SCKO vs. Phb1; JUN SCKO	1.709	1.512	0.1972	0.1255	6	6	1.572	20
Phb1 SCKO; JUN Het vs. Phb1; JUN SCKO	1.407	1.512	-0.1047	0.1255	6	6	0.834	20
p-eIF2a/eIF2a	Control						Phb1 SCKO						Phb1 SCKO; JUN Het						Phb1; JUN SCKO
	0.481193	1.0797	1.43911	1.33551	0.902165	0.762322	2.47148	3.53104	4.07299	2.11342	1.30861	2.33608	4.27579	3.0821	2.69596	1.86353	1.58505	1.84584	2.33458	2.21357	2.09127	1.65343	0.952589	2.40151
Number of families	1
Number of comparisons per family	6
Alpha	0.05
Holm-Sidak's multiple comparisons test	Mean Diff.	Significant?	Summary	Adjusted P Value
Control vs. Phb1 SCKO	-1.639	Yes	*	0.0104	A-B
Control vs. Phb1 SCKO; JUN Het	-1.558	Yes	*	0.0131	A-C
Control vs. Phb1; JUN SCKO	-0.9412	No	ns	0.19	A-D
Phb1 SCKO vs. Phb1 SCKO; JUN Het	0.08089	No	ns	0.8604	B-C
Phb1 SCKO vs. Phb1; JUN SCKO	0.6978	No	ns	0.364	B-D
Phb1 SCKO; JUN Het vs. Phb1; JUN SCKO	0.6169	No	ns	0.364	C-D
Test details	Mean 1	Mean 2	Mean Diff.	SE of diff.	n1	n2	t	DF
Control vs. Phb1 SCKO	1	2.639	-1.639	0.454	6	6	3.61	20
Control vs. Phb1 SCKO; JUN Het	1	2.558	-1.558	0.454	6	6	3.432	20
Control vs. Phb1; JUN SCKO	1	1.941	-0.9412	0.454	6	6	2.073	20
Phb1 SCKO vs. Phb1 SCKO; JUN Het	2.639	2.558	0.08089	0.454	6	6	0.1782	20
Phb1 SCKO vs. Phb1; JUN SCKO	2.639	1.941	0.6978	0.454	6	6	1.537	20
Phb1 SCKO; JUN Het vs. Phb1; JUN SCKO	2.558	1.941	0.6169	0.454	6	6	1.359	20
Opa1-L/Opa1-s	Control						Phb1 SCKO						Phb1 SCKO; JUN Het						Phb1; JUN SCKO
	1.12899	0.951837	0.919176	1.03245	0.99155	0.976005	0.64883	0.506654	0.531894	0.639363	0.630433	0.585235	0.659731	0.508611	0.481428	0.651616	0.716231	0.574856	0.590517	0.54797	0.492049	0.658249	1.05179	0.605471
Number of families	1
Number of comparisons per family	6
Alpha	0.05
Holm-Sidak's multiple comparisons test	Mean Diff.	Significant?	Summary	Adjusted P Value
Control vs. Phb1 SCKO	0.4096	Yes	****	<0.0001	A-B
Control vs. Phb1 SCKO; JUN Het	0.4013	Yes	****	<0.0001	A-C
Control vs. Phb1; JUN SCKO	0.3423	Yes	***	0.0003	A-D
Phb1 SCKO vs. Phb1 SCKO; JUN Het	-0.008344	No	ns	0.9056	B-C
Phb1 SCKO vs. Phb1; JUN SCKO	-0.06727	No	ns	0.7186	B-D
Phb1 SCKO; JUN Het vs. Phb1; JUN SCKO	-0.05893	No	ns	0.7186	C-D
Test details	Mean 1	Mean 2	Mean Diff.	SE of diff.	n1	n2	t	DF
Control vs. Phb1 SCKO	1	0.5904	0.4096	0.06951	6	6	5.893	20
Control vs. Phb1 SCKO; JUN Het	1	0.5987	0.4013	0.06951	6	6	5.773	20
Control vs. Phb1; JUN SCKO	1	0.6577	0.3423	0.06951	6	6	4.925	20
Phb1 SCKO vs. Phb1 SCKO; JUN Het	0.5904	0.5987	-0.008344	0.06951	6	6	0.12	20
Phb1 SCKO vs. Phb1; JUN SCKO	0.5904	0.6577	-0.06727	0.06951	6	6	0.9679	20
Phb1 SCKO; JUN Het vs. Phb1; JUN SCKO	0.5987	0.6577	-0.05893	0.06951	6	6	0.8478	20
BiP	Control						Phb1 SCKO						Phb1 SCKO; JUN Het						Phb1; JUN SCKO
	0.893358	0.943516	1.16312	1.00372	0.973433	1.02285	2.59499	2.07052	1.80224	2.5991	1.47978	1.76916	1.56906	1.36428	1.39095	1.08582	1.7399	1.6511	1.44526	1.07891	0.962587	1.68773	0.837474	1.36208
Number of families	1
Number of comparisons per family	6
Alpha	0.05
Holm-Sidak's multiple comparisons test	Mean Diff.	Significant?	Summary	Adjusted P Value
Control vs. Phb1 SCKO	-1.053	Yes	****	<0.0001	A-B
Control vs. Phb1 SCKO; JUN Het	-0.4669	Yes	*	0.0487	A-C
Control vs. Phb1; JUN SCKO	-0.229	No	ns	0.3558	A-D
Phb1 SCKO vs. Phb1 SCKO; JUN Het	0.5858	Yes	*	0.0148	B-C
Phb1 SCKO vs. Phb1; JUN SCKO	0.8236	Yes	***	0.0008	B-D
Phb1 SCKO; JUN Het vs. Phb1; JUN SCKO	0.2378	No	ns	0.3558	C-D
Test details	Mean 1	Mean 2	Mean Diff.	SE of diff.	n1	n2	t	DF
Control vs. Phb1 SCKO	1	2.053	-1.053	0.1784	6	6	5.902	20
Control vs. Phb1 SCKO; JUN Het	1	1.467	-0.4669	0.1784	6	6	2.617	20
Control vs. Phb1; JUN SCKO	1	1.229	-0.229	0.1784	6	6	1.284	20
Phb1 SCKO vs. Phb1 SCKO; JUN Het	2.053	1.467	0.5858	0.1784	6	6	3.284	20
Phb1 SCKO vs. Phb1; JUN SCKO	2.053	1.229	0.8236	0.1784	6	6	4.618	20
Phb1 SCKO; JUN Het vs. Phb1; JUN SCKO	1.467	1.229	0.2378	0.1784	6	6	1.333	20

## Sheet: Figure 6–figure supplement 1C
Figure 6–figure supplement 1C
Asns	Control							Phb1 SCKO							Phb1 SCKO; JUN Het							Phb1; JUN SCKO
	0.317596	1.96319	0.962836	0.728872	0.587164	1.44034		18.52	17.226	25.2234	17.8673	11.3203	10.1988	23.006	25.5658	28.955	27.8427	20.4903	11.6045	12.1597	18.6453	20.0313	14.7176	15.4026	14.7744	15.5139	17.3493
Number of families	1
Number of comparisons per family	6
Alpha	0.05
Holm-Sidak's multiple comparisons test	Mean Diff.	Significant?	Summary	Adjusted P Value
Control vs. Phb1 SCKO	-16.62	Yes	****	<0.0001	A-B
Control vs. Phb1 SCKO; JUN Het	-19.75	Yes	****	<0.0001	A-C
Control vs. Phb1; JUN SCKO	-15.3	Yes	****	<0.0001	A-D
Phb1 SCKO vs. Phb1 SCKO; JUN Het	-3.129	No	ns	0.4167	B-C
Phb1 SCKO vs. Phb1; JUN SCKO	1.325	No	ns	0.6253	B-D
Phb1 SCKO; JUN Het vs. Phb1; JUN SCKO	4.454	No	ns	0.2952	C-D
Test details	Mean 1	Mean 2	Mean Diff.	SE of diff.	n1	n2	t	DF
Control vs. Phb1 SCKO	1	17.62	-16.62	2.675	6	7	6.215	22
Control vs. Phb1 SCKO; JUN Het	1	20.75	-19.75	2.675	6	7	7.385	22
Control vs. Phb1; JUN SCKO	1	16.3	-15.3	2.776	6	6	5.512	22
Phb1 SCKO vs. Phb1 SCKO; JUN Het	17.62	20.75	-3.129	2.57	7	7	1.218	22
Phb1 SCKO vs. Phb1; JUN SCKO	17.62	16.3	1.325	2.675	7	6	0.4954	22
Phb1 SCKO; JUN Het vs. Phb1; JUN SCKO	20.75	16.3	4.454	2.675	7	6	1.665	22
Chac1	Control							Phb1 SCKO							Phb1 SCKO; JUN Het							Phb1; JUN SCKO
	1.0513	1.94924	0.668642	0.85441	0.675561	0.800844		30.8622	26.149	24.188	21.1659	15.6015	15.1054	34.7311	57.408	58.266	52.4905	18.1904	15.1792	18.3096	34.1658	28.6759	22.5249	16.7053	36.8305	39.5437	35.8882
Number of families	1
Number of comparisons per family	6
Alpha	0.05
Holm-Sidak's multiple comparisons test	Mean Diff.	Significant?	Summary	Adjusted P Value
Control vs. Phb1 SCKO	-22.97	Yes	**	0.0077	A-B
Control vs. Phb1 SCKO; JUN Het	-35.29	Yes	***	0.0001	A-C
Control vs. Phb1; JUN SCKO	-29.03	Yes	**	0.0015	A-D
Phb1 SCKO vs. Phb1 SCKO; JUN Het	-12.32	No	ns	0.1752	B-C
Phb1 SCKO vs. Phb1; JUN SCKO	-6.056	No	ns	0.5746	B-D
Phb1 SCKO; JUN Het vs. Phb1; JUN SCKO	6.259	No	ns	0.5746	C-D
Test details	Mean 1	Mean 2	Mean Diff.	SE of diff.	n1	n2	t	DF
Control vs. Phb1 SCKO	1	23.97	-22.97	6.524	6	7	3.521	22
Control vs. Phb1 SCKO; JUN Het	1	36.29	-35.29	6.524	6	7	5.409	22
Control vs. Phb1; JUN SCKO	1	30.03	-29.03	6.77	6	6	4.288	22
Phb1 SCKO vs. Phb1 SCKO; JUN Het	23.97	36.29	-12.32	6.268	7	7	1.965	22
Phb1 SCKO vs. Phb1; JUN SCKO	23.97	30.03	-6.056	6.524	7	6	0.9283	22
Phb1 SCKO; JUN Het vs. Phb1; JUN SCKO	36.29	30.03	6.259	6.524	7	6	0.9594	22
Pck2	Control							Phb1 SCKO							Phb1 SCKO; JUN Het							Phb1; JUN SCKO
	0.570273	1.98992	0.686258	0.620141	0.61462	1.51879		3.32033	3.53909	2.85734	1.99817	2.06756	0.99804	2.67454	4.63344	4.67444	4.3177	2.48542	1.45376	1.4777	2.0881	3.00649	1.7909	3.10771	1.63562	1.885	2.90003
Number of families	1
Number of comparisons per family	6
Alpha	0.05
Holm-Sidak's multiple comparisons test	Mean Diff.	Significant?	Summary	Adjusted P Value
Control vs. Phb1 SCKO	-1.494	No	ns	0.064	A-B
Control vs. Phb1 SCKO; JUN Het	-2.019	Yes	**	0.0085	A-C
Control vs. Phb1; JUN SCKO	-1.388	No	ns	0.0943	A-D
Phb1 SCKO vs. Phb1 SCKO; JUN Het	-0.5251	No	ns	0.6055	B-C
Phb1 SCKO vs. Phb1; JUN SCKO	0.106	No	ns	0.85	B-D
Phb1 SCKO; JUN Het vs. Phb1; JUN SCKO	0.631	No	ns	0.6055	C-D
Test details	Mean 1	Mean 2	Mean Diff.	SE of diff.	n1	n2	t	DF
Control vs. Phb1 SCKO	1	2.494	-1.494	0.5535	6	7	2.698	22
Control vs. Phb1 SCKO; JUN Het	1	3.019	-2.019	0.5535	6	7	3.647	22
Control vs. Phb1; JUN SCKO	1	2.388	-1.388	0.5744	6	6	2.416	22
Phb1 SCKO vs. Phb1 SCKO; JUN Het	2.494	3.019	-0.5251	0.5318	7	7	0.9873	22
Phb1 SCKO vs. Phb1; JUN SCKO	2.494	2.388	0.106	0.5535	7	6	0.1914	22
Phb1 SCKO; JUN Het vs. Phb1; JUN SCKO	3.019	2.388	0.631	0.5535	7	6	1.14	22
Ddit3	Control							Phb1 SCKO							Phb1 SCKO; JUN Het							Phb1; JUN SCKO
	0.678363	1.24484	0.840317	0.65826	0.843821	1.7344		3.64226	4.71141	4.18238	2.8994	2.29145	1.48395	3.7131	6.53774	6.7034	5.97501	3.59044	2.54808	2.44895	3.12968	4.32832	3.03316	3.39221	2.49786	2.38724	3.15827
Number of families	1
Number of comparisons per family	6
Alpha	0.05
Holm-Sidak's multiple comparisons test	Mean Diff.	Significant?	Summary	Adjusted P Value
Control vs. Phb1 SCKO	-2.275	Yes	*	0.0143	A-B
Control vs. Phb1 SCKO; JUN Het	-3.419	Yes	***	0.0003	A-C
Control vs. Phb1; JUN SCKO	-2.133	Yes	*	0.0244	A-D
Phb1 SCKO vs. Phb1 SCKO; JUN Het	-1.144	No	ns	0.1988	B-C
Phb1 SCKO vs. Phb1; JUN SCKO	0.142	No	ns	0.8362	B-D
Phb1 SCKO; JUN Het vs. Phb1; JUN SCKO	1.286	No	ns	0.1988	C-D
Test details	Mean 1	Mean 2	Mean Diff.	SE of diff.	n1	n2	t	DF
Control vs. Phb1 SCKO	1	3.275	-2.275	0.6785	6	7	3.353	22
Control vs. Phb1 SCKO; JUN Het	1	4.419	-3.419	0.6785	6	7	5.039	22
Control vs. Phb1; JUN SCKO	1	3.133	-2.133	0.7041	6	6	3.029	22
Phb1 SCKO vs. Phb1 SCKO; JUN Het	3.275	4.419	-1.144	0.6519	7	7	1.755	22
Phb1 SCKO vs. Phb1; JUN SCKO	3.275	3.133	0.142	0.6785	7	6	0.2093	22
Phb1 SCKO; JUN Het vs. Phb1; JUN SCKO	4.419	3.133	1.286	0.6785	7	6	1.896	22
