# Supplementary material for: Activation of mTORC1 and c-Jun by Prohibitin1 loss in Schwann cells may link mitochondrial dysfunction to demyelination
Source: eLife. 2021 Sep 14;10:e66278. doi: 10.7554/eLife.66278 (PMC8478418; doi:10.7554/eLife.66278)
Supplement: Figure 6—figure supplement 2—source data 2. [file elife-66278-fig6-figsupp2-data2.xlsx]

## Sheet: Figure 6–figure supplement 2B
Figure 6–figure supplement 2B
Myelinated			Unpaired t test
Control	JUN SCKO; Phb1 Het		P value	0.1212
1549	1458		P value summary	ns
1467	1521		Significantly different (P < 0.05)?	No
1586	1530		One- or two-tailed P value?	Two-tailed
1533	1492		t, df	t=1.693, df=10
1525	1527
1537	1383		How big is the difference?
			Mean of column A	1533
			Mean of column B	1485
			Difference between means (B - A) ± SEM	-47.67 ± 28.15
			95% confidence interval	-110.4 to 15.05
			R squared (eta squared)	0.2229
			F test to compare variances
			F, DFn, Dfd	2.169, 5, 5
			P value	0.4156
			P value summary	ns
			Significantly different (P < 0.05)?	No
			Data analyzed
			Sample size, column A	6
			Sample size, column B	6
Demyelinated
Control	JUN SCKO; Phb1 Het		Table Analyzed	Demyelinated axons
0	3
0	3		Column B	JUN SCKO; Phb1 Het
0	2		vs.	vs.
3	2		Column A	Control
0	2
4	0		Unpaired t test
			P value	0.362
			P value summary	ns
			Significantly different (P < 0.05)?	No
			One- or two-tailed P value?	Two-tailed
			t, df	t=0.9552, df=10
			How big is the difference?
			Mean of column A	1.167
			Mean of column B	2
			Difference between means (B - A) ± SEM	0.8333 ± 0.8724
			95% confidence interval	-1.111 to 2.777
			R squared (eta squared)	0.08361
			F test to compare variances
			F, DFn, Dfd	2.806, 5, 5
			P value	0.2821
			P value summary	ns
			Significantly different (P < 0.05)?	No
			Data analyzed
			Sample size, column A	6
			Sample size, column B	6
Myelinophagy			Table Analyzed	Myelinophgy
Control	JUN SCKO; Phb1 Het
0	0		Column B	JUN SCKO; Phb1 Het
0	0		vs.	vs.
0	0		Column A	Control
1	0
0	0		Unpaired t test
0	0		P value	0.3409
			P value summary	ns
			Significantly different (P < 0.05)?	No
			One- or two-tailed P value?	Two-tailed
			t, df	t=1.000, df=10
			How big is the difference?
			Mean of column A	0.1667
			Mean of column B	0
			Difference between means (B - A) ± SEM	-0.1667 ± 0.1667
			95% confidence interval	-0.5380 to 0.2047
			R squared (eta squared)	0.09091
			F test to compare variances
			F, DFn, Dfd	Infinity, 5, 5
			P value	<0.0001
			P value summary	****
			Significantly different (P < 0.05)?	Yes
			Data analyzed
			Sample size, column A	6
			Sample size, column B	6
Degenerating
Control	JUN SCKO; Phb1 Het		no t-test possible because all values are identical
0	0
0	0
0	0
0	0
0	0
0	0

## Sheet: Figure 6–figure supplement 2D
Figure 6–figure supplement 2D
	Control						JUN SCKO Phb1 Het
p-eIF2a	0.427015	1.07237	1.50062	1.2129	1.01512	0.771982	0.980115	2.3284	1.46772	0.905293
eIF2a	0.961187	0.912439	1.12637	0.851784	0.971315	1.1769	1.10091	1.11661	1.09331	1.19625
p-4E-BP1	0.694143	1.03675	1.26911	0.987587	0.98604	1.02637	0.955803	0.999964	1.08576	1.74844
4E-BP1	0.828387	0.920441	1.25117	0.873987	0.9031	1.22291	1.05912	1.32281	1.06495	0.904917
p-S6	1.13081	0.764451	1.10474	0.920497	0.922059	1.15744	1.27854	1.43346	0.944563	1.2364
S6	1.11095	0.902788	0.986265	0.985605	1.0009	1.01349	0.797493	0.748868	0.99941	0.517302
c-Jun	0.98683	0.72117	1.292	1.08226	1.21268	0.705059	0.843956	1.4482	0.735504	0.61033
BiP	0.893358	0.943516	1.16312	1.00372	0.973433	1.02285	1.20771	1.22423	0.987074	1.08431
Opa1-L/ Opa1-s	1.12899	0.951837	0.919176	1.03245	0.99155	0.976005	0.901499	0.910504	1.05312	0.971378
	Significant?	P value	Mean of Control	Mean of JUN SCKO Phb1 Het	Difference	SE of difference	t ratio	df	Adjusted P Value
p-eIF2a	No	0.225534	1	1.42038	-0.420381	0.320124	1.31318	8	0.72138
eIF2a	No	0.094729	1	1.12677	-0.126771	0.0669062	1.89476	8	0.504218
p-4E-BP1	No	0.289435	1	1.19749	-0.197492	0.174079	1.13449	8	0.745074
4E-BP1	No	0.474585	1	1.08795	-0.0879503	0.117227	0.750257	8	0.791318
p-S6	No	0.083967	1	1.22324	-0.223241	0.113154	1.9729	8	0.504218
S6	No	0.025312	1	0.765768	0.234232	0.0853772	2.74349	8	0.206057
c-Jun	No	0.651926	1	0.909499	0.0905011	0.193171	0.468502	8	0.791318
BiP	No	0.086716	1	1.12583	-0.125829	0.0644597	1.95206	8	0.504218
Opa1-L/ Opa1-s	No	0.406853	1	0.959124	0.0408759	0.0466922	0.875433	8	0.791318

## Sheet: Figure 6–figure supplement 2E
Figure 6–figure supplement 2E
		Control						JUN SCKO Phb1 Het
	1	108	124	109.667	118	116	79.3333	73.3333	110.667	100.667	141.333	91.3333	86.3333
	2	88.6667	125	134.667	98	139	64.6667	74.3333	90.6667	105.667	132.667	105.333	87.6667
	3	116.667	176.333	140	152	175	92.6667	88	120.667	136	141.667	166	127.667
	4	139	170	149.667	127.333	195.667	89.6667	127.333	114.667	138.667	142.667	226.333	118
Compare each cell mean with the other cell mean in that row.
Number of families	1
Number of comparisons per family	4
Alpha	0.05
Holm-Sidak's multiple comparisons test	Mean Diff.	Significant?	Summary	Adjusted P Value
Control - JUN SCKO Phb1 Het
Row 1	8.556	No	ns	0.9361
Row 2	8.944	No	ns	0.9361
Row 3	12.11	No	ns	0.926
Row 4	0.6111	No	ns	0.9714
Test details	Mean 1	Mean 2	Mean Diff.	SE of diff.	N1	N2	t	DF
Control - JUN SCKO Phb1 Het
Row 1	109.2	100.6	8.556	16.93	6	6	0.5054	40
Row 2	108.3	99.39	8.944	16.93	6	6	0.5284	40
Row 3	142.1	130	12.11	16.93	6	6	0.7155	40
Row 4	145.2	144.6	0.6111	16.93	6	6	0.0361	40

## Sheet: Figure 6–figure supplement 2F
Figure 6–figure supplement 2F
	Control						JUN SCKO Phb1 Het
Asns	0.317596	1.96319	0.962836	0.728872	0.587164	1.44034	1.23892	0.988715	1.01487	1.102	1.13893	1.12287
Chac1	1.0513	1.94924	0.668642	0.85441	0.675561	0.800844	2.47006	2.01407	0.813827	1.46989	1.4895	1.76894
Pck2	0.570273	1.98992	0.686258	0.620141	0.61462	1.51879	1.12995	1.26878	0.563688	0.863842	1.11159	0.433158
Ddit3	0.678363	1.24484	0.840317	0.65826	0.843821	1.7344	1.14544	1.52386	0.568909	0.842696	0.838572	0.519743
	Significant?	P value	Mean of Control	Mean of JUN SCKO Phb1 Het	Difference	SE of difference	t ratio	df	Adjusted P Value
Asns	No	0.694475	1	1.10105	-0.101047	0.249907	0.40434	10	0.970891
Chac1	No	0.051128	1	1.67105	-0.671048	0.30296	2.21498	10	0.189355
Pck2	No	0.718129	1	0.895169	0.104831	0.282303	0.371342	10	0.970891
Ddit3	No	0.692384	1	0.906536	0.0934638	0.229483	0.40728	10	0.970891
