# Supplementary material for: Activation of mTORC1 and c-Jun by Prohibitin1 loss in Schwann cells may link mitochondrial dysfunction to demyelination
Source: eLife. 2021 Sep 14;10:e66278. doi: 10.7554/eLife.66278 (PMC8478418; doi:10.7554/eLife.66278)
Supplement: Figure 6—source data 2. [file elife-66278-fig6-data2.xlsx]

## Sheet: Figure 6A
Figure 6A
	Control						Phb1 SCKO						Phb1 SCKO; JUN Het						Phb1; JUN SCKO
	0.98683	0.72117	1.292	1.08226	1.21268	0.705059	9.93849	8.42239	9.26214	4.73732	6.44492	4.683	6.46483	6.58282	8.52641	4.79483	4.05594	2.98893	5.72605	3.07247	3.28082	1.5943	0.62502	1.47535
Number of families	1
Number of comparisons per family	6
Alpha	0.05
Holm-Sidak's multiple comparisons test	Mean Diff.	Significant?	Summary	Adjusted P Value
Control vs. Phb1 SCKO	-6.248	Yes	****	<0.0001	A-B
Control vs. Phb1 SCKO; JUN Het	-4.569	Yes	**	0.0011	A-C
Control vs. Phb1; JUN SCKO	-1.629	No	ns	0.2214	A-D
Phb1 SCKO vs. Phb1 SCKO; JUN Het	1.679	No	ns	0.2214	B-C
Phb1 SCKO vs. Phb1; JUN SCKO	4.619	Yes	**	0.0011	B-D
Phb1 SCKO; JUN Het vs. Phb1; JUN SCKO	2.94	Yes	*	0.0286	C-D
Test details	Mean 1	Mean 2	Mean Diff.	SE of diff.	n1	n2	t	DF
Control vs. Phb1 SCKO	1	7.248	-6.248	1.027	6	6	6.085	20
Control vs. Phb1 SCKO; JUN Het	1	5.569	-4.569	1.027	6	6	4.45	20
Control vs. Phb1; JUN SCKO	1	2.629	-1.629	1.027	6	6	1.587	20
Phb1 SCKO vs. Phb1 SCKO; JUN Het	7.248	5.569	1.679	1.027	6	6	1.635	20
Phb1 SCKO vs. Phb1; JUN SCKO	7.248	2.629	4.619	1.027	6	6	4.499	20
Phb1 SCKO; JUN Het vs. Phb1; JUN SCKO	5.569	2.629	2.94	1.027	6	6	2.863	20

## Sheet: Figure 6C
Figure 6C
Myelinated axons
	Control							Phb1 SCKO							Phb1 SCKO; JUN Het							Phb1; JUN SCKO
	1549	1467	1586	1533	1525	1537		1037	1197	1235	1057	1128	1116		1218	1114	1028	1096	1048	1105	930	1036	1050	632	711	869
Number of families	1
Number of comparisons per family	6
Alpha	0.05
Holm-Sidak's multiple comparisons test	Mean Diff.	Significant?	Summary	Adjusted P Value
Control vs. Phb1 SCKO	404.5	Yes	****	<0.0001	A-B
Control vs. Phb1 SCKO; JUN Het	455.8	Yes	****	<0.0001	A-C
Control vs. Phb1; JUN SCKO	663.7	Yes	****	<0.0001	A-D
Phb1 SCKO vs. Phb1 SCKO; JUN Het	51.33	No	ns	0.3864	B-C
Phb1 SCKO vs. Phb1; JUN SCKO	259.2	Yes	***	0.0009	B-D
Phb1 SCKO; JUN Het vs. Phb1; JUN SCKO	207.8	Yes	**	0.0035	C-D
Test details	Mean 1	Mean 2	Mean Diff.	SE of diff.	n1	n2	t	DF
Control vs. Phb1 SCKO	1533	1128	404.5	60.23	6	6	6.716	21
Control vs. Phb1 SCKO; JUN Het	1533	1077	455.8	58.03	6	7	7.854	21
Control vs. Phb1; JUN SCKO	1533	869.2	663.7	60.23	6	6	11.02	21
Phb1 SCKO vs. Phb1 SCKO; JUN Het	1128	1077	51.33	58.03	6	7	0.8845	21
Phb1 SCKO vs. Phb1; JUN SCKO	1128	869.2	259.2	60.23	6	6	4.303	21
Phb1 SCKO; JUN Het vs. Phb1; JUN SCKO	1077	869.2	207.8	58.03	7	6	3.581	21
Demyelinated axons
	Control							Phb1 SCKO							Phb1 SCKO; JUN Het							Phb1; JUN SCKO
	0	0	0	3	0	4		74	106	98	100	92	121		68	45	17	46	86	116	83	42	28	41	17	30	13
Number of families	1
Number of comparisons per family	6
Alpha	0.05
Holm-Sidak's multiple comparisons test	Mean Diff.	Significant?	Summary	Adjusted P Value
Control vs. Phb1 SCKO	-97.33	Yes	****	<0.0001	A-B
Control vs. Phb1 SCKO; JUN Het	-64.69	Yes	****	<0.0001	A-C
Control vs. Phb1; JUN SCKO	-27.33	Yes	*	0.0274	A-D
Phb1 SCKO vs. Phb1 SCKO; JUN Het	32.64	Yes	*	0.0156	B-C
Phb1 SCKO vs. Phb1; JUN SCKO	70	Yes	****	<0.0001	B-D
Phb1 SCKO; JUN Het vs. Phb1; JUN SCKO	37.36	Yes	**	0.0088	C-D
Test details	Mean 1	Mean 2	Mean Diff.	SE of diff.	n1	n2	t	DF
Control vs. Phb1 SCKO	1.167	98.5	-97.33	11.53	6	6	8.443	21
Control vs. Phb1 SCKO; JUN Het	1.167	65.86	-64.69	11.11	6	7	5.823	21
Control vs. Phb1; JUN SCKO	1.167	28.5	-27.33	11.53	6	6	2.371	21
Phb1 SCKO vs. Phb1 SCKO; JUN Het	98.5	65.86	32.64	11.11	6	7	2.938	21
Phb1 SCKO vs. Phb1; JUN SCKO	98.5	28.5	70	11.53	6	6	6.072	21
Phb1 SCKO; JUN Het vs. Phb1; JUN SCKO	65.86	28.5	37.36	11.11	7	6	3.363	21
Myelinophagy
	Control							Phb1 SCKO							Phb1 SCKO; JUN Het							Phb1; JUN SCKO
	0	0	0	1	0	0		10	9	9	18	14	6		6	4	3	8	14	8	9	1	2	1	2	0	3
Number of families	1
Number of comparisons per family	6
Alpha	0.05
Holm-Sidak's multiple comparisons test	Mean Diff.	Significant?	Summary	Adjusted P Value
Control vs. Phb1 SCKO	-10.83	Yes	****	<0.0001	A-B
Control vs. Phb1 SCKO; JUN Het	-7.262	Yes	***	0.0008	A-C
Control vs. Phb1; JUN SCKO	-1.333	No	ns	0.4366	A-D
Phb1 SCKO vs. Phb1 SCKO; JUN Het	3.571	No	ns	0.076	B-C
Phb1 SCKO vs. Phb1; JUN SCKO	9.5	Yes	****	<0.0001	B-D
Phb1 SCKO; JUN Het vs. Phb1; JUN SCKO	5.929	Yes	**	0.0044	C-D
Test details	Mean 1	Mean 2	Mean Diff.	SE of diff.	n1	n2	t	DF
Control vs. Phb1 SCKO	0.1667	11	-10.83	1.681	6	6	6.444	21
Control vs. Phb1 SCKO; JUN Het	0.1667	7.429	-7.262	1.62	6	7	4.483	21
Control vs. Phb1; JUN SCKO	0.1667	1.5	-1.333	1.681	6	6	0.7931	21
Phb1 SCKO vs. Phb1 SCKO; JUN Het	11	7.429	3.571	1.62	6	7	2.205	21
Phb1 SCKO vs. Phb1; JUN SCKO	11	1.5	9.5	1.681	6	6	5.651	21
Phb1 SCKO; JUN Het vs. Phb1; JUN SCKO	7.429	1.5	5.929	1.62	7	6	3.66	21
Degenerating axons
	Control							Phb1 SCKO							Phb1 SCKO; JUN Het							Phb1; JUN SCKO
	0	0	0	0	0	0		0	2	1	5	0	1		0	0	1	0	1	2	1	1	2	4	4	0	1
Number of families	1
Number of comparisons per family	6
Alpha	0.05
Holm-Sidak's multiple comparisons test	Mean Diff.	Significant?	Summary	Adjusted P Value
Control vs. Phb1 SCKO	-1.5	No	ns	0.2541	A-B
Control vs. Phb1 SCKO; JUN Het	-0.7143	No	ns	0.6358	A-C
Control vs. Phb1; JUN SCKO	-2	No	ns	0.0802	A-D
Phb1 SCKO vs. Phb1 SCKO; JUN Het	0.7857	No	ns	0.6358	B-C
Phb1 SCKO vs. Phb1; JUN SCKO	-0.5	No	ns	0.6358	B-D
Phb1 SCKO; JUN Het vs. Phb1; JUN SCKO	-1.286	No	ns	0.3069	C-D
Test details	Mean 1	Mean 2	Mean Diff.	SE of diff.	n1	n2	t	DF
Control vs. Phb1 SCKO	0	1.5	-1.5	0.7446	6	6	2.015	21
Control vs. Phb1 SCKO; JUN Het	0	0.7143	-0.7143	0.7175	6	7	0.9955	21
Control vs. Phb1; JUN SCKO	0	2	-2	0.7446	6	6	2.686	21
Phb1 SCKO vs. Phb1 SCKO; JUN Het	1.5	0.7143	0.7857	0.7175	6	7	1.095	21
Phb1 SCKO vs. Phb1; JUN SCKO	1.5	2	-0.5	0.7446	6	6	0.6715	21
Phb1 SCKO; JUN Het vs. Phb1; JUN SCKO	0.7143	2	-1.286	0.7175	7	6	1.792	21

## Sheet: Figure 6D
Figure 6D
	Control							Phb1 SCKO							Phb1 SCKO; JUN Het							Phb1; JUN SCKO
	0	0	0	0	0	0		0	0	0	0	0	0		0	0	0	1	0	0	0	0	24	11	1	0	19
Number of families	1
Number of comparisons per family	6
Alpha	0.05
Holm-Sidak's multiple comparisons test	Mean Diff.	Significant?	Summary	Adjusted P Value
Control vs. Phb1 SCKO	0	No	ns	>0.9999	A-B
Control vs. Phb1 SCKO; JUN Het	-0.1429	No	ns	>0.9999	A-C
Control vs. Phb1; JUN SCKO	-9.167	Yes	*	0.0284	A-D
Phb1 SCKO vs. Phb1 SCKO; JUN Het	-0.1429	No	ns	>0.9999	B-C
Phb1 SCKO vs. Phb1; JUN SCKO	-9.167	Yes	*	0.0284	B-D
Phb1 SCKO; JUN Het vs. Phb1; JUN SCKO	-9.024	Yes	*	0.0284	C-D
Test details	Mean 1	Mean 2	Mean Diff.	SE of diff.	n1	n2	t	DF
Control vs. Phb1 SCKO	0	0	0	2.97	6	6	0	21
Control vs. Phb1 SCKO; JUN Het	0	0.1429	-0.1429	2.862	6	7	0.04992	21
Control vs. Phb1; JUN SCKO	0	9.167	-9.167	2.97	6	6	3.086	21
Phb1 SCKO vs. Phb1 SCKO; JUN Het	0	0.1429	-0.1429	2.862	6	7	0.04992	21
Phb1 SCKO vs. Phb1; JUN SCKO	0	9.167	-9.167	2.97	6	6	3.086	21
Phb1 SCKO; JUN Het vs. Phb1; JUN SCKO	0.1429	9.167	-9.024	2.862	7	6	3.153	21

## Sheet: Figure 6E
Figure 6E
		Control						Phb1 SCKO						Phb1; JUN SCKO						Phb1 SCKO JUN Het
	1	108	124	109.667	118	116	79.3333	7.33333	53.6667	8.66667	6	16.6667	15	11.6667	29	44.3333	15	4.66667	20	35.3333	17.6667	21.6667	28	30.6667	38.6667
	2	88.6667	125	134.667	98	139	64.6667	20.3333	47	14	12.6667	39	39.3333	13.3333	41	36.3333	24.3333	27	32	37.6667	19.6667	15.3333	27.3333	14	45.3333
	3	116.667	176.333	140	152	175	92.6667	11.3333	77	34	16.3333	39	17.3333	23.3333	26.3333	87.6667	38.3333	52.3333	40.6667	34.3333	25.6667	24	26.6667	27.3333	36.3333
	4	139	170	149.667	127.333	195.667	89.6667	6.66667	106	26.6667	34.3333	36.3333	13.3333	39.3333	37	124	42.3333	67	50.3333	54.3333	54.6667	29.3333	21.3333	18.6667	36.3333
Within each row, compare columns (simple effects within rows)
Number of families	1
Number of comparisons per family	24
Alpha	0.05
Holm-Sidak's multiple comparisons test	Mean Diff.	Significant?	Summary	Adjusted P Value
Row 1
Control vs. Phb1 SCKO	91.28	Yes	****	< 0.0001
Control vs. Phb1; JUN SCKO	88.39	Yes	****	< 0.0001
Control vs. Phb1 SCKO JUN Het	80.5	Yes	****	< 0.0001
Phb1 SCKO vs. Phb1; JUN SCKO	-2.889	No	ns	> 0.9999
Phb1 SCKO vs. Phb1 SCKO JUN Het	-10.78	No	ns	0.9867
Phb1; JUN SCKO vs. Phb1 SCKO JUN Het	-7.889	No	ns	0.9964
Row 2
Control vs. Phb1 SCKO	79.61	Yes	****	< 0.0001
Control vs. Phb1; JUN SCKO	79.33	Yes	****	< 0.0001
Control vs. Phb1 SCKO JUN Het	81.78	Yes	****	< 0.0001
Phb1 SCKO vs. Phb1; JUN SCKO	-0.2778	No	ns	> 0.9999
Phb1 SCKO vs. Phb1 SCKO JUN Het	2.167	No	ns	> 0.9999
Phb1; JUN SCKO vs. Phb1 SCKO JUN Het	2.444	No	ns	> 0.9999
Row 3
Control vs. Phb1 SCKO	109.6	Yes	****	< 0.0001
Control vs. Phb1; JUN SCKO	97.33	Yes	****	< 0.0001
Control vs. Phb1 SCKO JUN Het	113.1	Yes	****	< 0.0001
Phb1 SCKO vs. Phb1; JUN SCKO	-12.28	No	ns	0.9808
Phb1 SCKO vs. Phb1 SCKO JUN Het	3.444	No	ns	> 0.9999
Phb1; JUN SCKO vs. Phb1 SCKO JUN Het	15.72	No	ns	0.9337
Row 4
Control vs. Phb1 SCKO	108	Yes	****	< 0.0001
Control vs. Phb1; JUN SCKO	85.22	Yes	****	< 0.0001
Control vs. Phb1 SCKO JUN Het	109.4	Yes	****	< 0.0001
Phb1 SCKO vs. Phb1; JUN SCKO	-22.78	No	ns	0.6395
Phb1 SCKO vs. Phb1 SCKO JUN Het	1.444	No	ns	> 0.9999
Phb1; JUN SCKO vs. Phb1 SCKO JUN Het	24.22	No	ns	0.584
Test details	Mean 1	Mean 2	Mean Diff.	SE of diff.	N1	N2	t	DF
Row 1
Control vs. Phb1 SCKO	109.2	17.89	91.28	13.21	6	6	6.908	80
Control vs. Phb1; JUN SCKO	109.2	20.78	88.39	13.21	6	6	6.69	80
Control vs. Phb1 SCKO JUN Het	109.2	28.67	80.5	13.21	6	6	6.093	80
Phb1 SCKO vs. Phb1; JUN SCKO	17.89	20.78	-2.889	13.21	6	6	0.2186	80
Phb1 SCKO vs. Phb1 SCKO JUN Het	17.89	28.67	-10.78	13.21	6	6	0.8157	80
Phb1; JUN SCKO vs. Phb1 SCKO JUN Het	20.78	28.67	-7.889	13.21	6	6	0.5971	80
Row 2
Control vs. Phb1 SCKO	108.3	28.72	79.61	13.21	6	6	6.025	80
Control vs. Phb1; JUN SCKO	108.3	29	79.33	13.21	6	6	6.004	80
Control vs. Phb1 SCKO JUN Het	108.3	26.56	81.78	13.21	6	6	6.189	80
Phb1 SCKO vs. Phb1; JUN SCKO	28.72	29	-0.2778	13.21	6	6	0.02102	80
Phb1 SCKO vs. Phb1 SCKO JUN Het	28.72	26.56	2.167	13.21	6	6	0.164	80
Phb1; JUN SCKO vs. Phb1 SCKO JUN Het	29	26.56	2.444	13.21	6	6	0.185	80
Row 3
Control vs. Phb1 SCKO	142.1	32.5	109.6	13.21	6	6	8.296	80
Control vs. Phb1; JUN SCKO	142.1	44.78	97.33	13.21	6	6	7.367	80
Control vs. Phb1 SCKO JUN Het	142.1	29.06	113.1	13.21	6	6	8.556	80
Phb1 SCKO vs. Phb1; JUN SCKO	32.5	44.78	-12.28	13.21	6	6	0.9292	80
Phb1 SCKO vs. Phb1 SCKO JUN Het	32.5	29.06	3.444	13.21	6	6	0.2607	80
Phb1; JUN SCKO vs. Phb1 SCKO JUN Het	44.78	29.06	15.72	13.21	6	6	1.19	80
Row 4
Control vs. Phb1 SCKO	145.2	37.22	108	13.21	6	6	8.174	80
Control vs. Phb1; JUN SCKO	145.2	60	85.22	13.21	6	6	6.45	80
Control vs. Phb1 SCKO JUN Het	145.2	35.78	109.4	13.21	6	6	8.283	80
Phb1 SCKO vs. Phb1; JUN SCKO	37.22	60	-22.78	13.21	6	6	1.724	80
Phb1 SCKO vs. Phb1 SCKO JUN Het	37.22	35.78	1.444	13.21	6	6	0.1093	80
Phb1; JUN SCKO vs. Phb1 SCKO JUN Het	60	35.78	24.22	13.21	6	6	1.833	80
