# Supplementary material for: Activation of mTORC1 and c-Jun by Prohibitin1 loss in Schwann cells may link mitochondrial dysfunction to demyelination
Source: eLife. 2021 Sep 14;10:e66278. doi: 10.7554/eLife.66278 (PMC8478418; doi:10.7554/eLife.66278)
Supplement: Figure 7—figure supplement 1—source data 1. [file elife-66278-fig7-figsupp1-data1.xlsx]

## Sheet: Figure 7–figure supplement 1A
Figure 7–figure supplement 1A
p-4E-BP1/4E-BP1	Control + Veh						Control + Rapa						Phb1 SCKO + Veh						Phb1 SCKO + Rapa
	1.17415	0.796625	1.02923	0.856004	1.08976	1.05424	0.874694	2.86857	1.50456	0.980042	0.930193	0.925579	2.35901	1.694	2.02157	1.27865	1.15181	1.08028	1.3	1.4041	0.615537	0.94798	1.13154
Compare cell means regardless of rows and columns
Number of families	1
Number of comparisons per family	6
Alpha	0.05
Holm-Sidak's multiple comparisons test	Predicted (LS) mean diff.	Significant?	Summary	Adjusted P Value
Veh:Control vs. Veh:Phb1 SCKO	-0.5976	No	ns	0.2889
Veh:Control vs. Rapa:Control	-0.3473	No	ns	0.6834
Veh:Control vs. Rapa:Phb1 SCKO	-0.07983	No	ns	0.7975
Veh:Phb1 SCKO vs. Rapa:Control	0.2503	No	ns	0.7778
Veh:Phb1 SCKO vs. Rapa:Phb1 SCKO	0.5177	No	ns	0.4351
Rapa:Control vs. Rapa:Phb1 SCKO	0.2674	No	ns	0.7778
Test details	Predicted (LS) mean 1	Predicted (LS) mean 2	Predicted (LS) mean diff.	SE of diff.	N1	N2	t	DF
Veh:Control vs. Veh:Phb1 SCKO	1	1.598	-0.5976	0.2926	6	6	2.042	19
Veh:Control vs. Rapa:Control	1	1.347	-0.3473	0.2926	6	6	1.187	19
Veh:Control vs. Rapa:Phb1 SCKO	1	1.08	-0.07983	0.3069	6	5	0.2602	19
Veh:Phb1 SCKO vs. Rapa:Control	1.598	1.347	0.2503	0.2926	6	6	0.8554	19
Veh:Phb1 SCKO vs. Rapa:Phb1 SCKO	1.598	1.08	0.5177	0.3069	6	5	1.687	19
Rapa:Control vs. Rapa:Phb1 SCKO	1.347	1.08	0.2674	0.3069	6	5	0.8715	19
p-S6/S6	Control + Veh						Control + Rapa						Phb1 SCKO + Veh						Phb1 SCKO + Rapa
	1.08689	0.62924	1.28388	0.899975	1.10222	0.997806	1.07175	0.794534	0.637262	0.417363	0.594863	0.152717	1.65247	3.35842	1.51582	1.7048	6.02375	2.00651	0.439532	0.872467	0.22158	0.230239	0.148059
Compare cell means regardless of rows and columns
Number of families	1
Number of comparisons per family	6
Alpha	0.05
Holm-Sidak's multiple comparisons test	Predicted (LS) mean diff.	Significant?	Summary	Adjusted P Value
Veh:Control vs. Veh:Phb1 SCKO	-1.71	Yes	*	0.0198
Veh:Control vs. Rapa:Control	0.3886	No	ns	0.729
Veh:Control vs. Rapa:Phb1 SCKO	0.6176	No	ns	0.639
Veh:Phb1 SCKO vs. Rapa:Control	2.099	Yes	**	0.0048
Veh:Phb1 SCKO vs. Rapa:Phb1 SCKO	2.328	Yes	**	0.0035
Rapa:Control vs. Rapa:Phb1 SCKO	0.229	No	ns	0.729
Test details	Predicted (LS) mean 1	Predicted (LS) mean 2	Predicted (LS) mean diff.	SE of diff.	N1	N2	t	DF
Veh:Control vs. Veh:Phb1 SCKO	1	2.71	-1.71	0.5387	6	6	3.175	19
Veh:Control vs. Rapa:Control	1	0.6114	0.3886	0.5387	6	6	0.7214	19
Veh:Control vs. Rapa:Phb1 SCKO	1	0.3824	0.6176	0.565	6	5	1.093	19
Veh:Phb1 SCKO vs. Rapa:Control	2.71	0.6114	2.099	0.5387	6	6	3.896	19
Veh:Phb1 SCKO vs. Rapa:Phb1 SCKO	2.71	0.3824	2.328	0.565	6	5	4.121	19
Rapa:Control vs. Rapa:Phb1 SCKO	0.6114	0.3824	0.229	0.565	6	5	0.4054	19
