# Supplementary material for: Activation of mTORC1 and c-Jun by Prohibitin1 loss in Schwann cells may link mitochondrial dysfunction to demyelination
Source: eLife. 2021 Sep 14;10:e66278. doi: 10.7554/eLife.66278 (PMC8478418; doi:10.7554/eLife.66278)
Supplement: Figure 7—figure supplement 2—source data 1. [file elife-66278-fig7-figsupp2-data1.xlsx]

## Sheet: Figure 7–figure supplement 2B
Figure 7–figure supplement 2B
Myelinated	Control				Phb1 SCKO
Veh	48335.1	47052.2	44114.6	50382.7	45280.6	37698.4	35525.3	43367.3
Rapa	44217.7	53184.9	39270.3	53366.2	50020	51729	56870.7	52721.1
Compare cell means regardless of rows and columns
Number of families	1
Number of comparisons per family	6
Alpha	0.05
Holm-Sidak's multiple comparisons test	Mean Diff.	Significant?	Summary	Adjusted P Value
Veh:Control vs. Veh:Phb1 SCKO	7003	No	ns	0.2331
Veh:Control vs. Rapa:Control	-38.62	No	ns	0.9907
Veh:Control vs. Rapa:Phb1 SCKO	-5364	No	ns	0.3318
Veh:Phb1 SCKO vs. Rapa:Control	-7042	No	ns	0.2331
Veh:Phb1 SCKO vs. Rapa:Phb1 SCKO	-12367	Yes	*	0.0152
Rapa:Control vs. Rapa:Phb1 SCKO	-5325	No	ns	0.3318
Test details	Mean 1	Mean 2	Mean Diff.	SE of diff.	N1	N2	t	DF
Veh:Control vs. Veh:Phb1 SCKO	47471	40468	7003	3260	4	4	2.148	12
Veh:Control vs. Rapa:Control	47471	47510	-38.62	3260	4	4	0.01185	12
Veh:Control vs. Rapa:Phb1 SCKO	47471	52835	-5364	3260	4	4	1.646	12
Veh:Phb1 SCKO vs. Rapa:Control	40468	47510	-7042	3260	4	4	2.16	12
Veh:Phb1 SCKO vs. Rapa:Phb1 SCKO	40468	52835	-12367	3260	4	4	3.794	12
Rapa:Control vs. Rapa:Phb1 SCKO	47510	52835	-5325	3260	4	4	1.634	12
Demyelinated	Control				Phb1 SCKO
Veh	0	226.757	206.143	637.755	2869.9	2267.57	5668.93	3158.41
Rapa	295.77	0	103.072	117.288	2400.96	708.617	1360.54	2093.14
Compare cell means regardless of rows and columns
Number of families	1
Number of comparisons per family	6
Alpha	0.05
Holm-Sidak's multiple comparisons test	Mean Diff.	Significant?	Summary	Adjusted P Value
Veh:Control vs. Veh:Phb1 SCKO	-3224	Yes	***	0.0009
Veh:Control vs. Rapa:Control	138.6	No	ns	0.822
Veh:Control vs. Rapa:Phb1 SCKO	-1373	No	ns	0.082
Veh:Phb1 SCKO vs. Rapa:Control	3362	Yes	***	0.0007
Veh:Phb1 SCKO vs. Rapa:Phb1 SCKO	1850	Yes	*	0.0384
Rapa:Control vs. Rapa:Phb1 SCKO	-1512	No	ns	0.0804
Test details	Mean 1	Mean 2	Mean Diff.	SE of diff.	N1	N2	t	DF
Veh:Control vs. Veh:Phb1 SCKO	267.7	3491	-3224	603	4	4	5.346	12
Veh:Control vs. Rapa:Control	267.7	129	138.6	603	4	4	0.2299	12
Veh:Control vs. Rapa:Phb1 SCKO	267.7	1641	-1373	603	4	4	2.277	12
Veh:Phb1 SCKO vs. Rapa:Control	3491	129	3362	603	4	4	5.576	12
Veh:Phb1 SCKO vs. Rapa:Phb1 SCKO	3491	1641	1850	603	4	4	3.069	12
Rapa:Control vs. Rapa:Phb1 SCKO	129	1641	-1512	603	4	4	2.507	12
Degenerating	Control				Phb1 SCKO
Veh	0	113.379	0	0	318.878	425.17	503.905	850.34
Rapa	0	0	0	0	200.08	283.447	680.272	261.643
Compare cell means regardless of rows and columns
Number of families	1
Number of comparisons per family	6
Alpha	0.05
Holm-Sidak's multiple comparisons test	Mean Diff.	Significant?	Summary	Adjusted P Value
Veh:Control vs. Veh:Phb1 SCKO	-496.2	Yes	**	0.0047
Veh:Control vs. Rapa:Control	28.34	No	ns	0.8079
Veh:Control vs. Rapa:Phb1 SCKO	-328	Yes	*	0.0412
Veh:Phb1 SCKO vs. Rapa:Control	524.6	Yes	**	0.0037
Veh:Phb1 SCKO vs. Rapa:Phb1 SCKO	168.2	No	ns	0.3043
Rapa:Control vs. Rapa:Phb1 SCKO	-356.4	Yes	*	0.0346
Test details	Mean 1	Mean 2	Mean Diff.	SE of diff.	N1	N2	t	DF
Veh:Control vs. Veh:Phb1 SCKO	28.34	524.6	-496.2	114	4	4	4.352	12
Veh:Control vs. Rapa:Control	28.34	0	28.34	114	4	4	0.2486	12
Veh:Control vs. Rapa:Phb1 SCKO	28.34	356.4	-328	114	4	4	2.877	12
Veh:Phb1 SCKO vs. Rapa:Control	524.6	0	524.6	114	4	4	4.601	12
Veh:Phb1 SCKO vs. Rapa:Phb1 SCKO	524.6	356.4	168.2	114	4	4	1.475	12
Rapa:Control vs. Rapa:Phb1 SCKO	0	356.4	-356.4	114	4	4	3.125	12
