# Supplementary material for: Activation of mTORC1 and c-Jun by Prohibitin1 loss in Schwann cells may link mitochondrial dysfunction to demyelination
Source: eLife. 2021 Sep 14;10:e66278. doi: 10.7554/eLife.66278 (PMC8478418; doi:10.7554/eLife.66278)
Supplement: Figure 7—figure supplement 3—source data 2. [file elife-66278-fig7-figsupp3-data2.xlsx]

## Sheet: Figure 7–figure supplement 3B
Figure 7–figure supplement 3B
c-Jun		Control						Phb1 SCKO
	Veh	0.610208	0.866759	1.52303	0.757816	1.61511	0.627075	2.45681	4.05503	3.85765	3.60556	5.90777	3.76338
	Rapa	0.951994	0.670779	0.928581	0.352498	1.10752	1.05915	2.82294	2.37454	4.96302	2.22231	1.43421
Compare cell means regardless of rows and columns
Number of families	1
Number of comparisons per family	6
Alpha	0.05
Holm-Sidak's multiple comparisons test	Predicted (LS) mean diff.	Significant?	Summary	Adjusted P Value
Veh:Control vs. Veh:Phb1 SCKO	-2.941	Yes	****	<0.0001
Veh:Control vs. Rapa:Control	0.1549	No	ns	0.7637
Veh:Control vs. Rapa:Phb1 SCKO	-1.763	Yes	*	0.011
Veh:Phb1 SCKO vs. Rapa:Control	3.096	Yes	****	<0.0001
Veh:Phb1 SCKO vs. Rapa:Phb1 SCKO	1.178	No	ns	0.0776
Rapa:Control vs. Rapa:Phb1 SCKO	-1.918	Yes	**	0.0076
Test details	Predicted (LS) mean 1	Predicted (LS) mean 2	Predicted (LS) mean diff.	SE of diff.	N1	N2	t	DF
Veh:Control vs. Veh:Phb1 SCKO	1	3.941	-2.941	0.5081	6	6	5.789	19
Veh:Control vs. Rapa:Control	1	0.8451	0.1549	0.5081	6	6	0.3049	19
Veh:Control vs. Rapa:Phb1 SCKO	1	2.763	-1.763	0.5329	6	5	3.309	19
Veh:Phb1 SCKO vs. Rapa:Control	3.941	0.8451	3.096	0.5081	6	6	6.094	19
Veh:Phb1 SCKO vs. Rapa:Phb1 SCKO	3.941	2.763	1.178	0.5329	6	5	2.21	19
Rapa:Control vs. Rapa:Phb1 SCKO	0.8451	2.763	-1.918	0.5329	6	5	3.6	19
p-eIF2a		Control						Phb1 SCKO
	Veh	0.692443	1.48366	0.823893	1.19102	0.675659	1.13332	4.56211	4.65786	3.46203	3.89176	3.10895	2.77084
	Rapa	0.623692	0.694218	0.981063	0.31978	0.930226		3.13953	2.88306	3.39897	1.93986	2.89782
Number of comparisons per family	6
Alpha	0.05
Holm-Sidak's multiple comparisons test	Predicted (LS) mean diff.	Significant?	Summary	Adjusted P Value
Veh:Control vs. Veh:Phb1 SCKO	-2.742	Yes	****	<0.0001
Veh:Control vs. Rapa:Control	0.2902	No	ns	0.374
Veh:Control vs. Rapa:Phb1 SCKO	-1.852	Yes	****	<0.0001
Veh:Phb1 SCKO vs. Rapa:Control	3.032	Yes	****	<0.0001
Veh:Phb1 SCKO vs. Rapa:Phb1 SCKO	0.8904	Yes	*	0.0237
Rapa:Control vs. Rapa:Phb1 SCKO	-2.142	Yes	****	<0.0001
Test details	Predicted (LS) mean 1	Predicted (LS) mean 2	Predicted (LS) mean diff.	SE of diff.	N1	N2	t	DF
Veh:Control vs. Veh:Phb1 SCKO	1	3.742	-2.742	0.3035	6	6	9.036	18
Veh:Control vs. Rapa:Control	1	0.7098	0.2902	0.3183	6	5	0.9117	18
Veh:Control vs. Rapa:Phb1 SCKO	1	2.852	-1.852	0.3183	6	5	5.818	18
Veh:Phb1 SCKO vs. Rapa:Control	3.742	0.7098	3.032	0.3183	6	5	9.527	18
Veh:Phb1 SCKO vs. Rapa:Phb1 SCKO	3.742	2.852	0.8904	0.3183	6	5	2.797	18
Rapa:Control vs. Rapa:Phb1 SCKO	0.7098	2.852	-2.142	0.3325	5	5	6.443	18
eIF2a		Control						Phb1 SCKO
	Veh	0.884052	1.06466	1.05128	0.782752	1.3726	0.844649	1.59553	1.23813	0.538365	1.76485	1.6555	1.64196
	Rapa	0.90923	1.08712	1.37796	0.298548	1.1597	1.06272	0.952759	0.879824	0.662803	1.4417	1.18746
Compare cell means regardless of rows and columns
Number of families	1
Number of comparisons per family	6
Alpha	0.05
Holm-Sidak's multiple comparisons test	Predicted (LS) mean diff.	Significant?	Summary	Adjusted P Value
Veh:Control vs. Veh:Phb1 SCKO	-0.4057	No	ns	0.2649
Veh:Control vs. Rapa:Control	0.01745	No	ns	0.9962
Veh:Control vs. Rapa:Phb1 SCKO	-0.02491	No	ns	0.9962
Veh:Phb1 SCKO vs. Rapa:Control	0.4232	No	ns	0.2649
Veh:Phb1 SCKO vs. Rapa:Phb1 SCKO	0.3808	No	ns	0.3095
Rapa:Control vs. Rapa:Phb1 SCKO	-0.04237	No	ns	0.9962
Test details	Predicted (LS) mean 1	Predicted (LS) mean 2	Predicted (LS) mean diff.	SE of diff.	N1	N2	t	DF
Veh:Control vs. Veh:Phb1 SCKO	1	1.406	-0.4057	0.2022	6	6	2.007	19
Veh:Control vs. Rapa:Control	1	0.9825	0.01745	0.2022	6	6	0.08634	19
Veh:Control vs. Rapa:Phb1 SCKO	1	1.025	-0.02491	0.212	6	5	0.1175	19
Veh:Phb1 SCKO vs. Rapa:Control	1.406	0.9825	0.4232	0.2022	6	6	2.093	19
Veh:Phb1 SCKO vs. Rapa:Phb1 SCKO	1.406	1.025	0.3808	0.212	6	5	1.796	19
Rapa:Control vs. Rapa:Phb1 SCKO	0.9825	1.025	-0.04237	0.212	6	5	0.1998	19
p-eIF2a/eIF2a		Control						Phb1 SCKO
	Veh	0.902382	1.10261	0.995006	1.32086	0.6222	1.05694	2.63687	2.87003	2.15079	2.39142	2.46185	5.04605
	Rapa	2.13102	0.610633	0.941693	0.344821	0.838937	3.70957	2.22137	2.47664	3.49769	2.16167	4.2865
Compare cell means regardless of rows and columns
Number of families	1
Number of comparisons per family	6
Alpha	0.05
Holm-Sidak's multiple comparisons test	Predicted (LS) mean diff.	Significant?	Summary	Adjusted P Value
Veh:Control vs. Veh:Phb1 SCKO	-1.926	Yes	*	0.0152
Veh:Control vs. Rapa:Control	-0.4294	No	ns	0.6957
Veh:Control vs. Rapa:Phb1 SCKO	-1.929	Yes	*	0.0181
Veh:Phb1 SCKO vs. Rapa:Control	1.497	No	ns	0.0558
Veh:Phb1 SCKO vs. Rapa:Phb1 SCKO	-0.002606	No	ns	0.9965
Rapa:Control vs. Rapa:Phb1 SCKO	-1.499	No	ns	0.0558
Test details	Predicted (LS) mean 1	Predicted (LS) mean 2	Predicted (LS) mean diff.	SE of diff.	N1	N2	t	DF
Veh:Control vs. Veh:Phb1 SCKO	1	2.926	-1.926	0.5547	6	6	3.473	19
Veh:Control vs. Rapa:Control	1	1.429	-0.4294	0.5547	6	6	0.7742	19
Veh:Control vs. Rapa:Phb1 SCKO	1	2.929	-1.929	0.5818	6	5	3.315	19
Veh:Phb1 SCKO vs. Rapa:Control	2.926	1.429	1.497	0.5547	6	6	2.698	19
Veh:Phb1 SCKO vs. Rapa:Phb1 SCKO	2.926	2.929	-0.002606	0.5818	6	5	0.00448	19
Rapa:Control vs. Rapa:Phb1 SCKO	1.429	2.929	-1.499	0.5818	6	5	2.577	19
BiP		Control						Phb1 SCKO
	Veh	0.888814	0.967872	1.14331	0.849443	1.06666	1.0839	1.11143	1.66269	1.47955	1.33359	1.45119	1.46512
	Rapa	0.74735	0.838798	0.927839	0.710248	0.66934	0.450935	1.01284	1.18886	0.890992	0.367864	0.948097
Compare cell means regardless of rows and columns
Number of families	1
Number of comparisons per family	6
Alpha	0.05
Holm-Sidak's multiple comparisons test	Predicted (LS) mean diff.	Significant?	Summary	Adjusted P Value
Veh:Control vs. Veh:Phb1 SCKO	-0.4173	Yes	**	0.007
Veh:Control vs. Rapa:Control	0.2759	No	ns	0.0772
Veh:Control vs. Rapa:Phb1 SCKO	0.1183	No	ns	0.3687
Veh:Phb1 SCKO vs. Rapa:Control	0.6932	Yes	****	<0.0001
Veh:Phb1 SCKO vs. Rapa:Phb1 SCKO	0.5355	Yes	**	0.0014
Rapa:Control vs. Rapa:Phb1 SCKO	-0.1576	No	ns	0.3687
Test details	Predicted (LS) mean 1	Predicted (LS) mean 2	Predicted (LS) mean diff.	SE of diff.	N1	N2	t	DF
Veh:Control vs. Veh:Phb1 SCKO	1	1.417	-0.4173	0.1147	6	6	3.639	19
Veh:Control vs. Rapa:Control	1	0.7241	0.2759	0.1147	6	6	2.407	19
Veh:Control vs. Rapa:Phb1 SCKO	1	0.8817	0.1183	0.1202	6	5	0.9836	19
Veh:Phb1 SCKO vs. Rapa:Control	1.417	0.7241	0.6932	0.1147	6	6	6.046	19
Veh:Phb1 SCKO vs. Rapa:Phb1 SCKO	1.417	0.8817	0.5355	0.1202	6	5	4.454	19
Rapa:Control vs. Rapa:Phb1 SCKO	0.7241	0.8817	-0.1576	0.1202	6	5	1.311	19
Opa1-L/Opa1-s		Control						Phb1 SCKO
	Veh	0.927208	1.05038	1.02241	1.03074	1.00388	0.965385	0.541975	0.648199	0.596186	0.578455	0.637303	0.575662
	Rapa	0.984591	1.18633	1.16158	1.23755	1.16317	1.28872	0.575893	0.518209	0.522488	0.612309	0.614767
Number of comparisons per family	6
Alpha	0.05
Holm-Sidak's multiple comparisons test	Predicted (LS) mean diff.	Significant?	Summary	Adjusted P Value
Veh:Control vs. Veh:Phb1 SCKO	0.4037	Yes	****	<0.0001
Veh:Control vs. Rapa:Control	-0.1703	Yes	***	0.0005
Veh:Control vs. Rapa:Phb1 SCKO	0.4313	Yes	****	<0.0001
Veh:Phb1 SCKO vs. Rapa:Control	-0.574	Yes	****	<0.0001
Veh:Phb1 SCKO vs. Rapa:Phb1 SCKO	0.02756	No	ns	0.4935
Rapa:Control vs. Rapa:Phb1 SCKO	0.6016	Yes	****	<0.0001
Test details	Predicted (LS) mean 1	Predicted (LS) mean 2	Predicted (LS) mean diff.	SE of diff.	N1	N2	t	DF
Veh:Control vs. Veh:Phb1 SCKO	1	0.5963	0.4037	0.03764	6	6	10.73	19
Veh:Control vs. Rapa:Control	1	1.17	-0.1703	0.03764	6	6	4.525	19
Veh:Control vs. Rapa:Phb1 SCKO	1	0.5687	0.4313	0.03947	6	5	10.93	19
Veh:Phb1 SCKO vs. Rapa:Control	0.5963	1.17	-0.574	0.03764	6	6	15.25	19
Veh:Phb1 SCKO vs. Rapa:Phb1 SCKO	0.5963	0.5687	0.02756	0.03947	6	5	0.6983	19
Rapa:Control vs. Rapa:Phb1 SCKO	1.17	0.5687	0.6016	0.03947	6	5	15.24	19

## Sheet: Figure 7–figure supplement 3C
Figure 7–figure supplement 3C
Asns		Control						Phb1 SCKO
	Veh	0.752208	0.873928	1.27005	0.977653	1.12616		8.89436	12.7598	11.6408	19.6201	14.4338	10.7551
	Rapa	0.473605	0.649303	0.432368	0.85491	0.542086	0.518019	6.8917	11.9783	12.3604	15.9749	13.8669	12.6721
Compare cell means regardless of rows and columns
Number of families	1
Number of comparisons per family	6
Alpha	0.05
Holm-Sidak's multiple comparisons test	Predicted (LS) mean diff.	Significant?	Summary	Adjusted P Value
Veh:Control vs. Veh:Phb1 SCKO	-12.02	Yes	****	<0.0001
Veh:Control vs. Rapa:Control	0.4216	No	ns	0.8522
Veh:Control vs. Rapa:Phb1 SCKO	-11.29	Yes	****	<0.0001
Veh:Phb1 SCKO vs. Rapa:Control	12.44	Yes	****	<0.0001
Veh:Phb1 SCKO vs. Rapa:Phb1 SCKO	0.7266	No	ns	0.8522
Rapa:Control vs. Rapa:Phb1 SCKO	-11.71	Yes	****	<0.0001
Test details	Predicted (LS) mean 1	Predicted (LS) mean 2	Predicted (LS) mean diff.	SE of diff.	N1	N2	t	DF
Veh:Control vs. Veh:Phb1 SCKO	1	13.02	-12.02	1.492	5	6	8.052	19
Veh:Control vs. Rapa:Control	1	0.5784	0.4216	1.492	5	6	0.2825	19
Veh:Control vs. Rapa:Phb1 SCKO	1	12.29	-11.29	1.492	5	6	7.565	19
Veh:Phb1 SCKO vs. Rapa:Control	13.02	0.5784	12.44	1.423	6	6	8.741	19
Veh:Phb1 SCKO vs. Rapa:Phb1 SCKO	13.02	12.29	0.7266	1.423	6	6	0.5106	19
Rapa:Control vs. Rapa:Phb1 SCKO	0.5784	12.29	-11.71	1.423	6	6	8.231	19
Chac1		Control						Phb1 SCKO
	Veh	1.15015	1.00041	0.942465	0.948839	0.958135		45.9963	31.8962	41.1095	51.8423	35.9135	22.3025
	Rapa	1.20297	1.22937	1.31429	1.91424	0.749847	1.33244	43.4882	64.8472	43.9093	33.5448	59.7323	30.0503
Compare cell means regardless of rows and columns
Number of families	1
Number of comparisons per family	6
Alpha	0.05
Holm-Sidak's multiple comparisons test	Predicted (LS) mean diff.	Significant?	Summary	Adjusted P Value
Veh:Control vs. Veh:Phb1 SCKO	-37.18	Yes	****	<0.0001
Veh:Control vs. Rapa:Control	-0.2905	No	ns	0.9577
Veh:Control vs. Rapa:Phb1 SCKO	-44.93	Yes	****	<0.0001
Veh:Phb1 SCKO vs. Rapa:Control	36.89	Yes	****	<0.0001
Veh:Phb1 SCKO vs. Rapa:Phb1 SCKO	-7.752	No	ns	0.2766
Rapa:Control vs. Rapa:Phb1 SCKO	-44.64	Yes	****	<0.0001
Test details	Predicted (LS) mean 1	Predicted (LS) mean 2	Predicted (LS) mean diff.	SE of diff.	N1	N2	t	DF
Veh:Control vs. Veh:Phb1 SCKO	1	38.18	-37.18	5.412	5	6	6.869	19
Veh:Control vs. Rapa:Control	1	1.291	-0.2905	5.412	5	6	0.05368	19
Veh:Control vs. Rapa:Phb1 SCKO	1	45.93	-44.93	5.412	5	6	8.302	19
Veh:Phb1 SCKO vs. Rapa:Control	38.18	1.291	36.89	5.16	6	6	7.148	19
Veh:Phb1 SCKO vs. Rapa:Phb1 SCKO	38.18	45.93	-7.752	5.16	6	6	1.502	19
Rapa:Control vs. Rapa:Phb1 SCKO	1.291	45.93	-44.64	5.16	6	6	8.651	19
Pck2		Control						Phb1 SCKO
	Veh	1.03266	0.961463	1.4749	0.681505	0.849462		1.61773	1.39596	2.07493	2.56826	2.2541	1.95532
	Rapa	0.514108	0.574239	0.595359	0.717481	0.567158	0.453659	1.19545	2.31178	2.02874	2.01445	2.3754	1.74899
Compare cell means regardless of rows and columns
Number of families	1
Number of comparisons per family	6
Alpha	0.05
Holm-Sidak's multiple comparisons test	Predicted (LS) mean diff.	Significant?	Summary	Adjusted P Value
Veh:Control vs. Veh:Phb1 SCKO	-0.9777	Yes	***	0.0006
Veh:Control vs. Rapa:Control	0.4297	No	ns	0.1013
Veh:Control vs. Rapa:Phb1 SCKO	-0.9458	Yes	***	0.0006
Veh:Phb1 SCKO vs. Rapa:Control	1.407	Yes	****	<0.0001
Veh:Phb1 SCKO vs. Rapa:Phb1 SCKO	0.03192	No	ns	0.8734
Rapa:Control vs. Rapa:Phb1 SCKO	-1.375	Yes	****	<0.0001
Test details	Predicted (LS) mean 1	Predicted (LS) mean 2	Predicted (LS) mean diff.	SE of diff.	N1	N2	t	DF
Veh:Control vs. Veh:Phb1 SCKO	1	1.978	-0.9777	0.2073	5	6	4.717	19
Veh:Control vs. Rapa:Control	1	0.5703	0.4297	0.2073	5	6	2.073	19
Veh:Control vs. Rapa:Phb1 SCKO	1	1.946	-0.9458	0.2073	5	6	4.563	19
Veh:Phb1 SCKO vs. Rapa:Control	1.978	0.5703	1.407	0.1976	6	6	7.121	19
Veh:Phb1 SCKO vs. Rapa:Phb1 SCKO	1.978	1.946	0.03192	0.1976	6	6	0.1615	19
Rapa:Control vs. Rapa:Phb1 SCKO	0.5703	1.946	-1.375	0.1976	6	6	6.96	19
Ddit3		Control						Phb1 SCKO
	Veh	0.461415	0.851046	1.39121	1.23165	1.06468		2.38331	2.06855	2.38499	2.4572	2.98305	2.27431
	Rapa	0.545605	0.432423	0.322863	0.678685	1.00077	0.500061	1.79236	1.47385	2.25707	1.53609	2.48093	1.59451
Number of comparisons per family	6
Alpha	0.05
Holm-Sidak's multiple comparisons test	Predicted (LS) mean diff.	Significant?	Summary	Adjusted P Value
Veh:Control vs. Veh:Phb1 SCKO	-1.425	Yes	****	<0.0001
Veh:Control vs. Rapa:Control	0.4199	No	ns	0.0529
Veh:Control vs. Rapa:Phb1 SCKO	-0.8558	Yes	**	0.0014
Veh:Phb1 SCKO vs. Rapa:Control	1.845	Yes	****	<0.0001
Veh:Phb1 SCKO vs. Rapa:Phb1 SCKO	0.5694	Yes	*	0.0169
Rapa:Control vs. Rapa:Phb1 SCKO	-1.276	Yes	****	<0.0001
Test details	Predicted (LS) mean 1	Predicted (LS) mean 2	Predicted (LS) mean diff.	SE of diff.	N1	N2	t	DF
Veh:Control vs. Veh:Phb1 SCKO	1	2.425	-1.425	0.2034	5	6	7.008	19
Veh:Control vs. Rapa:Control	1	0.5801	0.4199	0.2034	5	6	2.065	19
Veh:Control vs. Rapa:Phb1 SCKO	1	1.856	-0.8558	0.2034	5	6	4.208	19
Veh:Phb1 SCKO vs. Rapa:Control	2.425	0.5801	1.845	0.1939	6	6	9.516	19
Veh:Phb1 SCKO vs. Rapa:Phb1 SCKO	2.425	1.856	0.5694	0.1939	6	6	2.937	19
Rapa:Control vs. Rapa:Phb1 SCKO	0.5801	1.856	-1.276	0.1939	6	6	6.579	19
