# Supplementary material for: Activation of mTORC1 and c-Jun by Prohibitin1 loss in Schwann cells may link mitochondrial dysfunction to demyelination
Source: eLife. 2021 Sep 14;10:e66278. doi: 10.7554/eLife.66278 (PMC8478418; doi:10.7554/eLife.66278)
Supplement: Figure 7—source data 2. [file elife-66278-fig7-data2.xlsx]

## Sheet: Figure 7C
Figure 7C
p-4E-BP1		Control						Phb1 SCKO
	Veh	0.796575	0.742973	1.46045	0.535027	1.41344	1.05153	5.58764	7.75701	7.31618	3.51206	3.70476	2.65532
	Rapa	0.867407	1.07083	1.23911	0.710089	0.524999	0.864177	3.76489	3.79722	3.22349	1.64242	1.55831
Compare cell means regardless of rows and columns
Number of families	1
Number of comparisons per family	6
Alpha	0.05
Holm-Sidak's multiple comparisons test	Predicted (LS) mean diff.	Significant?	Summary	Adjusted P Value
Veh:Control vs. Veh:Phb1 SCKO	-4.089	Yes	****	<0.0001
Veh:Control vs. Rapa:Control	0.1206	No	ns	0.8668
Veh:Control vs. Rapa:Phb1 SCKO	-1.797	No	ns	0.0542
Veh:Phb1 SCKO vs. Rapa:Control	4.209	Yes	****	<0.0001
Veh:Phb1 SCKO vs. Rapa:Phb1 SCKO	2.292	Yes	*	0.0244
Rapa:Control vs. Rapa:Phb1 SCKO	-1.918	No	ns	0.0542
Test details	Predicted (LS) mean 1	Predicted (LS) mean 2	Predicted (LS) mean diff.	SE of diff.	N1	N2	t	DF
Veh:Control vs. Veh:Phb1 SCKO	1	5.089	-4.089	0.7092	6	6	5.765	19
Veh:Control vs. Rapa:Control	1	0.8794	0.1206	0.7092	6	6	0.17	19
Veh:Control vs. Rapa:Phb1 SCKO	1	2.797	-1.797	0.7438	6	5	2.416	19
Veh:Phb1 SCKO vs. Rapa:Control	5.089	0.8794	4.209	0.7092	6	6	5.935	19
Veh:Phb1 SCKO vs. Rapa:Phb1 SCKO	5.089	2.797	2.292	0.7438	6	5	3.081	19
Rapa:Control vs. Rapa:Phb1 SCKO	0.8794	2.797	-1.918	0.7438	6	5	2.578	19
4E-BP1		Control						Phb1 SCKO
	Veh	0.642266	1.33279	1.02494	0.671697	0.923399	1.4049	2.82246	3.30517	1.93438	2.34514	4.53368	3.58315
	Rapa	0.744531	0.579963	0.95941	0.981832	0.369596	0.8154	1.78033	1.41514	2.86734	2.67755	5.18492
Compare cell means regardless of rows and columns
Number of families	1
Number of comparisons per family	6
Alpha	0.05
Holm-Sidak's multiple comparisons test	Predicted (LS) mean diff.	Significant?	Summary	Adjusted P Value
Veh:Control vs. Veh:Phb1 SCKO	-2.087	Yes	**	0.0022
Veh:Control vs. Rapa:Control	0.2582	No	ns	0.8106
Veh:Control vs. Rapa:Phb1 SCKO	-1.785	Yes	**	0.0078
Veh:Phb1 SCKO vs. Rapa:Control	2.346	Yes	***	0.0008
Veh:Phb1 SCKO vs. Rapa:Phb1 SCKO	0.3023	No	ns	0.8106
Rapa:Control vs. Rapa:Phb1 SCKO	-2.043	Yes	**	0.0033
Test details	Predicted (LS) mean 1	Predicted (LS) mean 2	Predicted (LS) mean diff.	SE of diff.	N1	N2	t	DF
Veh:Control vs. Veh:Phb1 SCKO	1	3.087	-2.087	0.4919	6	6	4.243	19
Veh:Control vs. Rapa:Control	1	0.7418	0.2582	0.4919	6	6	0.5249	19
Veh:Control vs. Rapa:Phb1 SCKO	1	2.785	-1.785	0.5159	6	5	3.46	19
Veh:Phb1 SCKO vs. Rapa:Control	3.087	0.7418	2.346	0.4919	6	6	4.768	19
Veh:Phb1 SCKO vs. Rapa:Phb1 SCKO	3.087	2.785	0.3023	0.5159	6	5	0.5859	19
Rapa:Control vs. Rapa:Phb1 SCKO	0.7418	2.785	-2.043	0.5159	6	5	3.961	19
p-S6		Control						Phb1 SCKO
	Veh	0.713566	0.692023	1.59441	0.605887	0.857354	1.53676	2.2593	6.93554	2.39176	2.42677	5.49878	1.83483
	Rapa	0.45381	0.708479	0.558248	0.727871	0.712643	0.531275	0.598976	0.297739	0.215923	0.660882	1.03005
Compare cell means regardless of rows and columns
Number of families	1
Number of comparisons per family	6
Alpha	0.05
Holm-Sidak's multiple comparisons test	Predicted (LS) mean diff.	Significant?	Summary	Adjusted P Value
Veh:Control vs. Veh:Phb1 SCKO	-2.558	Yes	**	0.0035
Veh:Control vs. Rapa:Control	0.3846	No	ns	0.8934
Veh:Control vs. Rapa:Phb1 SCKO	0.4393	No	ns	0.8934
Veh:Phb1 SCKO vs. Rapa:Control	2.942	Yes	**	0.0013
Veh:Phb1 SCKO vs. Rapa:Phb1 SCKO	2.997	Yes	**	0.0015
Rapa:Control vs. Rapa:Phb1 SCKO	0.05467	No	ns	0.9367
Test details	Predicted (LS) mean 1	Predicted (LS) mean 2	Predicted (LS) mean diff.	SE of diff.	N1	N2	t	DF
Veh:Control vs. Veh:Phb1 SCKO	1	3.558	-2.558	0.6482	6	6	3.946	19
Veh:Control vs. Rapa:Control	1	0.6154	0.3846	0.6482	6	6	0.5933	19
Veh:Control vs. Rapa:Phb1 SCKO	1	0.5607	0.4393	0.6799	6	5	0.6461	19
Veh:Phb1 SCKO vs. Rapa:Control	3.558	0.6154	2.942	0.6482	6	6	4.539	19
Veh:Phb1 SCKO vs. Rapa:Phb1 SCKO	3.558	0.5607	2.997	0.6799	6	5	4.408	19
Rapa:Control vs. Rapa:Phb1 SCKO	0.6154	0.5607	0.05467	0.6799	6	5	0.08042	19
S6		Control						Phb1 SCKO
	Veh	0.536537	1.3114	1.15206	0.787978	0.623969	1.58805	1.41347	1.57588	1.16504	1.31708	1.14426	1.18465
	Rapa	0.65366	0.86328	0.802405	1.08062	1.18364	3.63287	1.44719	1.13632	2.68651	1.28519	1.44936
Compare cell means regardless of rows and columns
Number of families	1
Number of comparisons per family	6
Alpha	0.05
Holm-Sidak's multiple comparisons test	Predicted (LS) mean diff.	Significant?	Summary	Adjusted P Value
Veh:Control vs. Veh:Phb1 SCKO	-0.3001	No	ns	0.9128
Veh:Control vs. Rapa:Control	-0.3694	No	ns	0.8936
Veh:Control vs. Rapa:Phb1 SCKO	-0.6009	No	ns	0.6562
Veh:Phb1 SCKO vs. Rapa:Control	-0.06935	No	ns	0.9128
Veh:Phb1 SCKO vs. Rapa:Phb1 SCKO	-0.3009	No	ns	0.9128
Rapa:Control vs. Rapa:Phb1 SCKO	-0.2315	No	ns	0.9128
Test details	Predicted (LS) mean 1	Predicted (LS) mean 2	Predicted (LS) mean diff.	SE of diff.	N1	N2	t	DF
Veh:Control vs. Veh:Phb1 SCKO	1	1.3	-0.3001	0.3948	6	6	0.7601	19
Veh:Control vs. Rapa:Control	1	1.369	-0.3694	0.3948	6	6	0.9357	19
Veh:Control vs. Rapa:Phb1 SCKO	1	1.601	-0.6009	0.4141	6	5	1.451	19
Veh:Phb1 SCKO vs. Rapa:Control	1.3	1.369	-0.06935	0.3948	6	6	0.1757	19
Veh:Phb1 SCKO vs. Rapa:Phb1 SCKO	1.3	1.601	-0.3009	0.4141	6	5	0.7266	19
Rapa:Control vs. Rapa:Phb1 SCKO	1.369	1.601	-0.2315	0.4141	6	5	0.5591	19

## Sheet: Figure 7E
Figure 7E
Myelinated axons				Control						Phb1 SCKO
			Veh	1439	1465	1490	1449	1406	1570	1289	1255	1127	1233	1315	1201
			Rapa	1541	1505	1560	1421	1466	1401	1448	1335	1429	1464	1394
Compare cell means regardless of rows and columns
Number of families	1
Number of comparisons per family	6
Alpha	0.05
Holm-Sidak's multiple comparisons test	Predicted (LS) mean diff.	Significant?	Summary	Adjusted P Value
Veh:Control vs. Veh:Phb1 SCKO	233.2	Yes	****	<0.0001
Veh:Control vs. Rapa:Control	-12.5	No	ns	0.7245
Veh:Control vs. Rapa:Phb1 SCKO	55.83	No	ns	0.2675
Veh:Phb1 SCKO vs. Rapa:Control	-245.7	Yes	****	<0.0001
Veh:Phb1 SCKO vs. Rapa:Phb1 SCKO	-177.3	Yes	***	0.0005
Rapa:Control vs. Rapa:Phb1 SCKO	68.33	No	ns	0.2156
Test details	Predicted (LS) mean 1	Predicted (LS) mean 2	Predicted (LS) mean diff.	SE of diff.	N1	N2	t	DF
Veh:Control vs. Veh:Phb1 SCKO	1470	1237	233.2	34.94	6	6	6.673	19
Veh:Control vs. Rapa:Control	1470	1482	-12.5	34.94	6	6	0.3577	19
Veh:Control vs. Rapa:Phb1 SCKO	1470	1414	55.83	36.65	6	5	1.523	19
Veh:Phb1 SCKO vs. Rapa:Control	1237	1482	-245.7	34.94	6	6	7.03	19
Veh:Phb1 SCKO vs. Rapa:Phb1 SCKO	1237	1414	-177.3	36.65	6	5	4.839	19
Rapa:Control vs. Rapa:Phb1 SCKO	1482	1414	68.33	36.65	6	5	1.865	19
Demyelinated axons		Control						Phb1 SCKO
	Veh	1	0	0	2	1	6	32	63	94	42	37	67
	Rapa	0	0	2	6	0	1	13	10	21	19	20
Compare cell means regardless of rows and columns
Number of families	1
Number of comparisons per family	6
Alpha	0.05
Holm-Sidak's multiple comparisons test	Predicted (LS) mean diff.	Significant?	Summary	Adjusted P Value
Veh:Control vs. Veh:Phb1 SCKO	-54.17	Yes	****	<0.0001
Veh:Control vs. Rapa:Control	0.1667	No	ns	0.9816
Veh:Control vs. Rapa:Phb1 SCKO	-14.93	No	ns	0.1631
Veh:Phb1 SCKO vs. Rapa:Control	54.33	Yes	****	<0.0001
Veh:Phb1 SCKO vs. Rapa:Phb1 SCKO	39.23	Yes	***	0.0002
Rapa:Control vs. Rapa:Phb1 SCKO	-15.1	No	ns	0.1631
Test details	Predicted (LS) mean 1	Predicted (LS) mean 2	Predicted (LS) mean diff.	SE of diff.	N1	N2	t	DF
Veh:Control vs. Veh:Phb1 SCKO	1.667	55.83	-54.17	7.124	6	6	7.603	19
Veh:Control vs. Rapa:Control	1.667	1.5	0.1667	7.124	6	6	0.02339	19
Veh:Control vs. Rapa:Phb1 SCKO	1.667	16.6	-14.93	7.472	6	5	1.999	19
Veh:Phb1 SCKO vs. Rapa:Control	55.83	1.5	54.33	7.124	6	6	7.627	19
Veh:Phb1 SCKO vs. Rapa:Phb1 SCKO	55.83	16.6	39.23	7.472	6	5	5.251	19
Rapa:Control vs. Rapa:Phb1 SCKO	1.5	16.6	-15.1	7.472	6	5	2.021	19
Myelinophagy		Control						Phb1 SCKO
	Veh	0	0	0	0	0	0	1	12	16	3	10	11
	Rapa	0	0	0	0	0	0	2	0	4	1	3
Compare cell means regardless of rows and columns
Number of families	1
Number of comparisons per family	6
Alpha	0.05
Holm-Sidak's multiple comparisons test	Predicted (LS) mean diff.	Significant?	Summary	Adjusted P Value
Veh:Control vs. Veh:Phb1 SCKO	-8.833	Yes	***	0.0004
Veh:Control vs. Rapa:Control	0	No	ns	>0.9999
Veh:Control vs. Rapa:Phb1 SCKO	-2	No	ns	0.6378
Veh:Phb1 SCKO vs. Rapa:Control	8.833	Yes	***	0.0004
Veh:Phb1 SCKO vs. Rapa:Phb1 SCKO	6.833	Yes	**	0.0055
Rapa:Control vs. Rapa:Phb1 SCKO	-2	No	ns	0.6378
Test details	Predicted (LS) mean 1	Predicted (LS) mean 2	Predicted (LS) mean diff.	SE of diff.	N1	N2	t	DF
Veh:Control vs. Veh:Phb1 SCKO	0	8.833	-8.833	1.741	6	6	5.073	19
Veh:Control vs. Rapa:Control	0	0	0	1.741	6	6	0	19
Veh:Control vs. Rapa:Phb1 SCKO	0	2	-2	1.826	6	5	1.095	19
Veh:Phb1 SCKO vs. Rapa:Control	8.833	0	8.833	1.741	6	6	5.073	19
Veh:Phb1 SCKO vs. Rapa:Phb1 SCKO	8.833	2	6.833	1.826	6	5	3.742	19
Rapa:Control vs. Rapa:Phb1 SCKO	0	2	-2	1.826	6	5	1.095	19
Degenerating		Control						Phb1 SCKO
	Veh	1	2	0	0	1	1	5	6	12	5	5	3
	Rapa	1	0	2	1	1	0	4	3	3	4	3
Compare cell means regardless of rows and columns
Number of families	1
Number of comparisons per family	6
Alpha	0.05
Holm-Sidak's multiple comparisons test	Predicted (LS) mean diff.	Significant?	Summary	Adjusted P Value
Veh:Control vs. Veh:Phb1 SCKO	-5.167	Yes	***	0.0003
Veh:Control vs. Rapa:Control	0	No	ns	>0.9999
Veh:Control vs. Rapa:Phb1 SCKO	-2.567	No	ns	0.0797
Veh:Phb1 SCKO vs. Rapa:Control	5.167	Yes	***	0.0003
Veh:Phb1 SCKO vs. Rapa:Phb1 SCKO	2.6	No	ns	0.0797
Rapa:Control vs. Rapa:Phb1 SCKO	-2.567	No	ns	0.0797
Test details	Predicted (LS) mean 1	Predicted (LS) mean 2	Predicted (LS) mean diff.	SE of diff.	N1	N2	t	DF
Veh:Control vs. Veh:Phb1 SCKO	0.8333	6	-5.167	0.9811	6	6	5.266	19
Veh:Control vs. Rapa:Control	0.8333	0.8333	0	0.9811	6	6	0	19
Veh:Control vs. Rapa:Phb1 SCKO	0.8333	3.4	-2.567	1.029	6	5	2.494	19
Veh:Phb1 SCKO vs. Rapa:Control	6	0.8333	5.167	0.9811	6	6	5.266	19
Veh:Phb1 SCKO vs. Rapa:Phb1 SCKO	6	3.4	2.6	1.029	6	5	2.527	19
Rapa:Control vs. Rapa:Phb1 SCKO	0.8333	3.4	-2.567	1.029	6	5	2.494	19

## Sheet: Figure 7F
Figure 7F
		Control						Phb1-SCKO
	Veh	0.659	0.65	0.689	0.625	0.646	0.599	0.645	0.686	0.669	0.647	0.626	0.559
	Rapamycin	0.643	0.612	0.654	0.635	0.659	0.647	0.659	0.628	0.636	0.643	0.665	0.636
Compare cell means regardless of rows and columns
Number of families	1
Number of comparisons per family	6
Alpha	0.05
Holm-Sidak's multiple comparisons test	Mean Diff.	Significant?	Summary	Adjusted P Value
Veh:Control vs. Veh:Phb1-SCKO	0.006	No	ns	0.9996
Veh:Control vs. Rapamycin:Control	0.003	No	ns	0.9996
Veh:Control vs. Rapamycin:Phb1-SCKO	0.0001667	No	ns	0.9996
Veh:Phb1-SCKO vs. Rapamycin:Control	-0.003	No	ns	0.9996
Veh:Phb1-SCKO vs. Rapamycin:Phb1-SCKO	-0.005833	No	ns	0.9996
Rapamycin:Control vs. Rapamycin:Phb1-SCKO	-0.002833	No	ns	0.9996
Test details	Mean 1	Mean 2	Mean Diff.	SE of diff.	N1	N2	t	DF
Veh:Control vs. Veh:Phb1-SCKO	0.6447	0.6387	0.006	0.01679	6	6	0.3574	20
Veh:Control vs. Rapamycin:Control	0.6447	0.6417	0.003	0.01679	6	6	0.1787	20
Veh:Control vs. Rapamycin:Phb1-SCKO	0.6447	0.6445	0.0001667	0.01679	6	6	0.009929	20
Veh:Phb1-SCKO vs. Rapamycin:Control	0.6387	0.6417	-0.003	0.01679	6	6	0.1787	20
Veh:Phb1-SCKO vs. Rapamycin:Phb1-SCKO	0.6387	0.6445	-0.005833	0.01679	6	6	0.3475	20
Rapamycin:Control vs. Rapamycin:Phb1-SCKO	0.6417	0.6445	-0.002833	0.01679	6	6	0.1688	20

## Sheet: Figure 7G
Figure 7G
NCV			Control						Phb1 SCKO
		Veh	29	27	29	31	30		5	5.8	7.9	1.7	8.2
		Rapamycin	23	26	26	28	25	29	14	14	15	16
Compare cell means regardless of rows and columns
Number of families	1
Number of comparisons per family	6
Alpha	0.05
Holm-Sidak's multiple comparisons test	Predicted (LS) mean diff.	Significant?	Summary	Adjusted P Value
Veh:Control vs. Veh:Phb1 SCKO	23.48	Yes	****	<0.0001
Veh:Control vs. Rapamycin:Control	3.033	Yes	*	0.0216
Veh:Control vs. Rapamycin:Phb1 SCKO	14.45	Yes	****	<0.0001
Veh:Phb1 SCKO vs. Rapamycin:Control	-20.45	Yes	****	<0.0001
Veh:Phb1 SCKO vs. Rapamycin:Phb1 SCKO	-9.03	Yes	****	<0.0001
Rapamycin:Control vs. Rapamycin:Phb1 SCKO	11.42	Yes	****	<0.0001
Test details	Predicted (LS) mean 1	Predicted (LS) mean 2	Predicted (LS) mean diff.	SE of diff.	N1	N2	t	DF
Veh:Control vs. Veh:Phb1 SCKO	29.2	5.72	23.48	1.245	5	5	18.86	16
Veh:Control vs. Rapamycin:Control	29.2	26.17	3.033	1.192	5	6	2.545	16
Veh:Control vs. Rapamycin:Phb1 SCKO	29.2	14.75	14.45	1.32	5	4	10.95	16
Veh:Phb1 SCKO vs. Rapamycin:Control	5.72	26.17	-20.45	1.192	5	6	17.16	16
Veh:Phb1 SCKO vs. Rapamycin:Phb1 SCKO	5.72	14.75	-9.03	1.32	5	4	6.84	16
Rapamycin:Control vs. Rapamycin:Phb1 SCKO	26.17	14.75	11.42	1.27	6	4	8.987	16
CMAP amplitude		Control						Phb1 SCKO
	Veh	5	4.5	2.55	6.05	2.7		0.65	0.9	1.9	0.95	1.25
	Rapamycin	3.2	3.05	2.05	3.3	3.45	2.75	1.3	1.7	2.85	1.75
Compare cell means regardless of rows and columns
Number of families	1
Number of comparisons per family	6
Alpha	0.05
Holm-Sidak's multiple comparisons test	Predicted (LS) mean diff.	Significant?	Summary	Adjusted P Value
Veh:Control vs. Veh:Phb1 SCKO	3.03	Yes	***	0.0004
Veh:Control vs. Rapamycin:Control	1.193	No	ns	0.1196
Veh:Control vs. Rapamycin:Phb1 SCKO	2.26	Yes	**	0.008
Veh:Phb1 SCKO vs. Rapamycin:Control	-1.837	Yes	*	0.0143
Veh:Phb1 SCKO vs. Rapamycin:Phb1 SCKO	-0.77	No	ns	0.2152
Rapamycin:Control vs. Rapamycin:Phb1 SCKO	1.067	No	ns	0.1567
Test details	Predicted (LS) mean 1	Predicted (LS) mean 2	Predicted (LS) mean diff.	SE of diff.	N1	N2	t	DF
Veh:Control vs. Veh:Phb1 SCKO	4.16	1.13	3.03	0.5625	5	5	5.386	16
Veh:Control vs. Rapamycin:Control	4.16	2.967	1.193	0.5386	5	6	2.216	16
Veh:Control vs. Rapamycin:Phb1 SCKO	4.16	1.9	2.26	0.5967	5	4	3.788	16
Veh:Phb1 SCKO vs. Rapamycin:Control	1.13	2.967	-1.837	0.5386	5	6	3.41	16
Veh:Phb1 SCKO vs. Rapamycin:Phb1 SCKO	1.13	1.9	-0.77	0.5967	5	4	1.29	16
Rapamycin:Control vs. Rapamycin:Phb1 SCKO	2.967	1.9	1.067	0.5741	6	4	1.858	16

## Sheet: Figure 7H
Figure 7H
		Control + Veh								Phb1 SCKO + Veh								Control + Rapa								Phb1 SCKO + Rapa
	1	74.6667	101	91.6667	78	106	91.3333			15.3333	38	4.66667	34	65.3333	14			128	127	88.6667	113.333	58	80			64.6667	54.6667	43.3333	31.3333	47	44.6667
	2	89.3333	134.333	156.333	111.667	159.667	104.667			32.6667	37	10	78	79.6667	26			167.667	134.333	121.667	145	131	134			67.3333	65	38.6667	57.3333	78.6667	87.3333
	3	132.667	138	184.333	125.333	228	169.333			39	47	16.6667	100	90.3333	41.3333			166.333	173.667	161.333	178	159.333	206			97	92.6667	49.6667	39.3333	102	106
	4	143.667	155	172	183.667	244	180			43	48	11.3333	160.667	106	47			225.667	154	206	214.333	188	245.667			123	80.3333	38	53.6667	126.667	156.333
Within each row, compare columns (simple effects within rows)
Number of families	1
Number of comparisons per family	24
Alpha	0.05
Holm-Sidak's multiple comparisons test	Mean Diff.	Significant?	Summary	Adjusted P Value
Row 1
Control + Veh vs. Phb1 SCKO + Veh	61.89	Yes	**	0.0084
Control + Veh vs. Control + Rapa	-8.722	No	ns	0.845
Control + Veh vs. Phb1 SCKO + Rapa	42.83	No	ns	0.1418
Phb1 SCKO + Veh vs. Control + Rapa	-70.61	Yes	**	0.0017
Phb1 SCKO + Veh vs. Phb1 SCKO + Rapa	-19.06	No	ns	0.7323
Control + Rapa vs. Phb1 SCKO + Rapa	51.56	Yes	*	0.0423
Row 2
Control + Veh vs. Phb1 SCKO + Veh	82.11	Yes	***	0.0002
Control + Veh vs. Control + Rapa	-12.94	No	ns	0.845
Control + Veh vs. Phb1 SCKO + Rapa	60.28	Yes	*	0.0103
Phb1 SCKO + Veh vs. Control + Rapa	-95.06	Yes	****	< 0.0001
Phb1 SCKO + Veh vs. Phb1 SCKO + Rapa	-21.83	No	ns	0.7057
Control + Rapa vs. Phb1 SCKO + Rapa	73.22	Yes	**	0.0011
Row 3
Control + Veh vs. Phb1 SCKO + Veh	107.2	Yes	****	< 0.0001
Control + Veh vs. Control + Rapa	-11.17	No	ns	0.845
Control + Veh vs. Phb1 SCKO + Rapa	81.83	Yes	***	0.0002
Phb1 SCKO + Veh vs. Control + Rapa	-118.4	Yes	****	< 0.0001
Phb1 SCKO + Veh vs. Phb1 SCKO + Rapa	-25.39	No	ns	0.6651
Control + Rapa vs. Phb1 SCKO + Rapa	93	Yes	****	< 0.0001
Row 4
Control + Veh vs. Phb1 SCKO + Veh	110.4	Yes	****	< 0.0001
Control + Veh vs. Control + Rapa	-25.89	No	ns	0.6651
Control + Veh vs. Phb1 SCKO + Rapa	83.39	Yes	***	0.0001
Phb1 SCKO + Veh vs. Control + Rapa	-136.3	Yes	****	< 0.0001
Phb1 SCKO + Veh vs. Phb1 SCKO + Rapa	-27	No	ns	0.6651
Control + Rapa vs. Phb1 SCKO + Rapa	109.3	Yes	****	< 0.0001
Test details	Mean 1	Mean 2	Mean Diff.	SE of diff.	N1	N2	t	DF
Row 1
Control + Veh vs. Phb1 SCKO + Veh	90.44	28.56	61.89	17.55	6	6	3.527	80
Control + Veh vs. Control + Rapa	90.44	99.17	-8.722	17.55	6	6	0.4971	80
Control + Veh vs. Phb1 SCKO + Rapa	90.44	47.61	42.83	17.55	6	6	2.441	80
Phb1 SCKO + Veh vs. Control + Rapa	28.56	99.17	-70.61	17.55	6	6	4.024	80
Phb1 SCKO + Veh vs. Phb1 SCKO + Rapa	28.56	47.61	-19.06	17.55	6	6	1.086	80
Control + Rapa vs. Phb1 SCKO + Rapa	99.17	47.61	51.56	17.55	6	6	2.938	80
Row 2
Control + Veh vs. Phb1 SCKO + Veh	126	43.89	82.11	17.55	6	6	4.68	80
Control + Veh vs. Control + Rapa	126	138.9	-12.94	17.55	6	6	0.7377	80
Control + Veh vs. Phb1 SCKO + Rapa	126	65.72	60.28	17.55	6	6	3.435	80
Phb1 SCKO + Veh vs. Control + Rapa	43.89	138.9	-95.06	17.55	6	6	5.418	80
Phb1 SCKO + Veh vs. Phb1 SCKO + Rapa	43.89	65.72	-21.83	17.55	6	6	1.244	80
Control + Rapa vs. Phb1 SCKO + Rapa	138.9	65.72	73.22	17.55	6	6	4.173	80
Row 3
Control + Veh vs. Phb1 SCKO + Veh	162.9	55.72	107.2	17.55	6	6	6.111	80
Control + Veh vs. Control + Rapa	162.9	174.1	-11.17	17.55	6	6	0.6364	80
Control + Veh vs. Phb1 SCKO + Rapa	162.9	81.11	81.83	17.55	6	6	4.664	80
Phb1 SCKO + Veh vs. Control + Rapa	55.72	174.1	-118.4	17.55	6	6	6.747	80
Phb1 SCKO + Veh vs. Phb1 SCKO + Rapa	55.72	81.11	-25.39	17.55	6	6	1.447	80
Control + Rapa vs. Phb1 SCKO + Rapa	174.1	81.11	93	17.55	6	6	5.3	80
Row 4
Control + Veh vs. Phb1 SCKO + Veh	179.7	69.33	110.4	17.55	6	6	6.291	80
Control + Veh vs. Control + Rapa	179.7	205.6	-25.89	17.55	6	6	1.475	80
Control + Veh vs. Phb1 SCKO + Rapa	179.7	96.33	83.39	17.55	6	6	4.753	80
Phb1 SCKO + Veh vs. Control + Rapa	69.33	205.6	-136.3	17.55	6	6	7.767	80
Phb1 SCKO + Veh vs. Phb1 SCKO + Rapa	69.33	96.33	-27	17.55	6	6	1.539	80
Control + Rapa vs. Phb1 SCKO + Rapa	205.6	96.33	109.3	17.55	6	6	6.228	80
